# Supplementary material for: Association of Concomitant Use of Cholinesterase Inhibitors or Memantine With Cognitive Decline in Alzheimer Clinical Trials: A Meta-analysis
Source: PubMed Central journal article supplement (PMC6324361; doi:10.1001/jamanetworkopen.2018.4080), 2018-11-02
Supplement: jamanetwopen-1-e184080-s001.pdf [file jamanetwopen-1-e184080-s001.pdf]

## Supplementary Online Content

Kennedy RE, Cutter GR, Fowler ME, Schneider LS. Association of concomitant use of cholinesterase inhibitors or memantine with cognitive decline in Alzheimer clinical trials: a meta-analysis. *JAMA Netw Open*. 2018;1(7):e184080. doi:10.1001/jamanetworkopen.2018.4080

### **eAppendix 1.** Statistical Analysis

**eTable 1.** Placebo-Controlled and Observational Studies Included in the Analyses

**eTable 2.** Participant Characteristics by Concomitant Medication Group for the DHA Study Included in Analyses

**eTable 3.** Participant Characteristics by Concomitant Medication Group for the ES Study Included in Analyses

**eTable 4.** Participant Characteristics by Concomitant Medication Group for the HC Study Included in Analyses

**eTable 5.** Participant Characteristics by Concomitant Medication Group for the HU Study Included in Analyses

**eTable 6.** Participant Characteristics by Concomitant Medication Group for the LL Study Included in Analyses

**eTable 7.** Participant Characteristics by Concomitant Medication Group for the NS Study Included in Analyses

**eTable 8.** Participant Characteristics by Concomitant Medication Group for the PR Study Included in Analyses

**eTable 9.** Participant Characteristics by Concomitant Medication Group for the SL Study Included in Analyses

**eTable 10.** Participant Characteristics by Concomitant Medication Group for the VN Study Included in Analyses

**eTable 11.** Participant Characteristics by Concomitant Medication Group for the ADNI Study Included in Analyses

**eFigure 1.** Funnel Plot of Estimates (estimated annual rates of decline) vs Precision (standard error) Across All Studies

**eFigure 2.** Rates of Decline for Participants Taking ChEIs, Memantine, or Both Compared to Rates of Decline for Participants Taking Neither Medication, Excluding the Observational ADNI Study

**eFigure 3.** Effect Sizes for Rates of Decline of Participants Taking ChEIs, Memantine, or Both Compared to Rates of Decline for Participants Taking Neither Medication, Excluding the Observational ADNI Study

**eFigure 4.** Rates of Decline for Participants Taking ChEIs Only Compared to Rates of Decline for Participants Taking Neither ChEIs Nor Memantine

**eFigure 5.** Rates of Decline for Participants Taking Memantine or Both Memantine and ChEIs Compared to Rates of Decline for Participants Taking ChEIs or Neither

### **eReferences**

**eAppendix 2.** Association of Concomitant Use of Cholinesterase Inhibitors or Memantine With Cognitive Decline in Alzheimer Clinical Trials: Source Code and Output

This supplementary material has been provided by the authors to give readers additional information about their work.

## **eAppendix 1.** Statistical Analysis

Mixed effects linear models<sup>1</sup> were used to estimate the slopes (i.e., rates of change in points per year) of the ADAS-cog between medication groups (ChEIs, memantine, both, and neither) for each study individually. The group taking neither medication was used as the reference group in the primary comparisons. Additional analyses compared rates for individuals taking ChEIs to rates for individuals taking neither, and rates for individuals taking memantine or both to rates for individuals taking ChEIs or neither. The full model was constructed with medication group and time effects and group by time interactions, with age and education as covariates, and the reduced model with time, group, and age and education effects. Thus, for participant  $i = 1, 2, \dots, n$  at time  $j = 1, 2, \dots, n_i$ , the full model was

$$ADAS_{i,j} = age_i + education_i + group_i + time_{i,j} + group_i \cdot time_{i,j} + \varepsilon_{i,j}$$

and the reduced model was

$$ADAS_{i,j} = age_i + education_i + group_i + time_{i,j} + \varepsilon_{i,j}$$

where the model includes both fixed effects of time at the group level and random effects of time at the individual level. An unstructured covariance matrix was used to model independence of the slope and intercept parameters. Parameters were estimated using maximum likelihood. P-values for the group by time interaction were found using -2 times the difference in the log likelihood of the full and reduced model, which follows a chi-squared distribution. Mixed effects models were performed using the *lme4* package<sup>2</sup> in the R statistical environment version 3.5.0.<sup>3</sup> Effect sizes (Cohen's *d*) were calculated from the mixed model *t* statistics using the *EMAtools* package for R.

**eTable 1.** Placebo-Controlled and Observational Studies Included in the Analyses

| <b>Study (code), dates</b>                                                   | <b>Design</b>              | <b>Intervention</b>                         | <b>N</b> | <b>Duration (months)</b> | <b>Minimal Severity</b>         |
|------------------------------------------------------------------------------|----------------------------|---------------------------------------------|----------|--------------------------|---------------------------------|
| English Instruments (EIN) 1993-1995 <sup>4</sup>                             | Observational , AD, NL     | None                                        | 306      | 12                       | CDR $\geq$ 1 (AD)<br>CDR 0 (NL) |
| Selegiline, vitamin E (SL) 1993-1996 <sup>5</sup>                            | RCT, moderate to severe AD | Vitamin E, selegiline                       | 341      | 24                       | CDR $\geq$ 2                    |
| Agitation (AP) 1994-1996 <sup>6</sup>                                        | RCT, AD                    | Haloperidol, Trazodone, Behavior Techniques | 149      | 24                       | None                            |
| Prednisone (PR) 1995-1998 <sup>7</sup>                                       | RCT, mild to moderate AD   | Prednisone                                  | 138      | 16                       | MMSE 13-26                      |
| Conjugated estrogens (ES) 1995-1999 <sup>8</sup>                             | RCT, mild to moderate AD   | Conjugated estrogens                        | 120      | 15                       | MMSE 12-28                      |
| Melatonin (ML) 1997-2000 <sup>9</sup>                                        | RCT, mild to moderate AD   | Melatonin                                   | 157      | 2                        | MMSE 0-26                       |
| Non-steroidal anti-inflammatory (NS) 1999-2001 <sup>10</sup>                 | RCT, mild to moderate AD   | Rofecoxib, naproxen                         | 351      | 12                       | MMSE 13-26                      |
| Memory impairment study (MIS), donepezil, vitamin E, 1999-2004 <sup>11</sup> | RCT, MCI                   | Donepezil, vitamin E                        | 769      | 36                       | MMSE 24-30<br>CDR 0.5           |
| Normal Control (NL) 1999-2004; not yet published                             | Observational , NL         | None                                        | 100      | 36                       | MMSE 24-30                      |
| Valproate (VP) 2000-2002 <sup>12</sup>                                       | RCT, AD                    | Divalproex                                  | 153      | 3                        | MMSE 4-24                       |
| Prevention Instruments (PI) 2002-2006 <sup>13</sup>                          | Observational , MCI, NL    | None                                        | 662      | 48                       | MMSE 26-30                      |

|                                                                            |                                |                      |                                   |         |                                                                            |
|----------------------------------------------------------------------------|--------------------------------|----------------------|-----------------------------------|---------|----------------------------------------------------------------------------|
| Simvastatin (LL)<br>2003-2008 <sup>14</sup>                                | RCT, mild to moderate AD       | Simvastatin          | 406                               | 18      | MMSE<br>12-26                                                              |
| Valproate Neuroprotection (VN) 2003-2009 <sup>15</sup>                     | RCT, moderate AD               | Divalproex           | 313                               | 24      | MMSE<br>12-20                                                              |
| Vitamins B (HC) 2003-2007 <sup>16</sup>                                    | RCT, mild to moderate AD       | B vitamins           | 409                               | 18      | MMSE<br>14-26                                                              |
| Huperzine (HU) 2004-2007 <sup>17</sup>                                     | RCT, mild to moderate AD       | Huperzine A          | 210                               | 6       | MMSE<br>10-24                                                              |
| Docosahexaenoic acid (DHA) 2006-2009 <sup>18</sup>                         | RCT, mild to moderate AD       | Docosahexaenoic acid | 402                               | 18      | MMSE<br>14-26                                                              |
| Alzheimer's Disease Neuroimaging Initiative (ADNI) 2005-2010 <sup>19</sup> | Observational, AD, MCI, normal | None                 | 800 (192 AD, 398 MCI, 229 normal) | 36 (AD) | MMSE<br>20-26 (AD)<br>24-30 (MCI)<br>CDR 0 (NL)<br>0.5 (MCI)<br>0.5-1 (AD) |

Studies were drawn from the Alzheimer's Disease Cooperative Study (ADCS; <http://www.adcs.org>) and the Alzheimer's Disease Neuroimaging Initiative (ADNI; <http://adni.loni.ucla.edu>) and included those with baseline demographic data and information on comorbid medical disorders. RCT=randomized controlled trial; NL=normal control (who were not included in analyses).

**eTable 2.** Participant Characteristics by Concomitant Medication Group for the DHA Study Included in Analyses

|                        | <b>N</b> | <b>Both N=228</b> | <b>ChEI<br/>N=101</b> | <b>Memantine<br/>N=24</b> | <b>Neither<br/>N=33</b> | <b>P<br/>Value</b> |
|------------------------|----------|-------------------|-----------------------|---------------------------|-------------------------|--------------------|
| Age, Years             | 386      | 75.1 (8.84)       | 76.6 (8.24)           | 78.5 (5.64)               | 78.4 (8.71)             | 0.052              |
| Education              | 386      |                   |                       |                           |                         | 0.162              |
| Less Than HS           |          | 14 (6.14%)        | 12 (11.9%)            | 5 (20.8%)                 | 3 (9.09%)               |                    |
| HS Graduate            |          | 112 (49.1%)       | 53 (52.5%)            | 9 (37.5%)                 | 16 (48.5%)              |                    |
| College Graduate       |          | 102 (44.7%)       | 36 (35.6%)            | 10 (41.7%)                | 14 (42.4%)              |                    |
| Race, White            | 386      | 211 (92.5%)       | 92 (91.1%)            | 22 (91.7%)                | 28 (84.8%)              | 0.471              |
| Ethnicity, Hispanic    | 386      | 5 (2.19%)         | 3 (2.97%)             | 2 (8.33%)                 | 4 (12.1%)               | 0.022              |
| Sex, Female            | 386      | 122 (53.5%)       | 56 (55.4%)            | 13 (54.2%)                | 12 (36.4%)              | 0.271              |
| Married                | 386      | 169 (74.1%)       | 68 (67.3%)            | 17 (70.8%)                | 22 (66.7%)              | 0.569              |
| Treatment Arm, Placebo | 386      | 102 (44.7%)       | 31 (30.7%)            | 12 (50.0%)                | 14 (42.4%)              | 0.087              |
| ADAS-Cog, Baseline     | 386      | 25.3 (8.76)       | 21.2 (6.97)           | 25.0 (9.81)               | 17.8 (8.30)             | <0.001             |
| ADAS-Cog, 6 months     | 340      | 27.9 (9.89)       | 22.3 (8.24)           | 29.1 (9.38)               | 18.1 (11.4)             | <0.001             |
| ADAS-Cog, 12 months    | 300      | 29.6 (11.2)       | 23.5 (9.31)           | 28.1 (10.1)               | 17.0 (12.3)             | <0.001             |
| ADAS-Cog, 18 months    | 264      | 31.0 (12.0)       | 26.8 (11.8)           | 27.4 (11.6)               | 20.4 (14.0)             | <0.001             |

**eTable 3.** Participant Characteristics by Concomitant Medication Group for the ES Study Included in Analyses

|                        | <b>N</b> | <b>ChEI N=31</b> | <b>Neither N=84</b> | <b>P Value</b> |
|------------------------|----------|------------------|---------------------|----------------|
| Age, Years             | 115      | 74.3 (7.84)      | 75.6 (6.43)         | 0.419          |
| Education              | 115      |                  |                     | 0.127          |
| Less Than HS           |          | 4 (12.9%)        | 26 (31.0%)          |                |
| HS Graduate            |          | 21 (67.7%)       | 42 (50.0%)          |                |
| College Graduate       |          | 6 (19.4%)        | 16 (19.0%)          |                |
| Race, White            | 115      | 30 (96.8%)       | 72 (85.7%)          | 0.181          |
| Ethnicity, Hispanic    | 115      | 0 (0.00%)        | 4 (4.76%)           | 0.573          |
| Sex, Female            | 115      | 31 (100%)        | 84 (100%)           | .              |
| Married                | 115      | 16 (51.6%)       | 36 (42.9%)          | 0.531          |
| Treatment Arm, Placebo | 115      | 7 (22.6%)        | 30 (35.7%)          | 0.266          |
| ADAS-Cog, Baseline     | 115      | 24.1 (9.08)      | 24.3 (9.22)         | 0.923          |
| ADAS-Cog, 6 months     | 97       | 27.8 (10.1)      | 27.1 (9.40)         | 0.756          |
| ADAS-Cog, 12 months    | 90       | 32.4 (14.2)      | 27.4 (10.5)         | 0.118          |

**eTable 4.** Participant Characteristics by Concomitant Medication Group for the HC Study Included in Analyses

|                        | <b>N</b> | <b>Both N=186</b> | <b>ChEI<br/>N=171</b> | <b>Memantine<br/>N=4</b> | <b>Neither<br/>N=22</b> | <b>P<br/>Value</b> |
|------------------------|----------|-------------------|-----------------------|--------------------------|-------------------------|--------------------|
| Age, Years             | 383      | 75.7 (8.01)       | 77.4 (7.29)           | 82.0 (8.91)              | 73.6 (8.42)             | 0.024              |
| Education              | 383      |                   |                       |                          |                         | 0.238              |
| Less Than HS           |          | 17 (9.14%)        | 26 (15.2%)            | 0 (0.00%)                | 6 (27.3%)               |                    |
| HS Graduate            |          | 95 (51.1%)        | 81 (47.4%)            | 2 (50.0%)                | 10 (45.5%)              |                    |
| College Graduate       |          | 74 (39.8%)        | 64 (37.4%)            | 2 (50.0%)                | 6 (27.3%)               |                    |
| Race, White            | 383      | 171 (91.9%)       | 147 (86.0%)           | 4 (100%)                 | 9 (40.9%)               | <0.001             |
| Ethnicity, Hispanic    | 383      | 7 (3.76%)         | 14 (8.19%)            | 0 (0.00%)                | 0 (0.00%)               | 0.244              |
| Sex, Female            | 383      | 98 (52.7%)        | 97 (56.7%)            | 3 (75.0%)                | 16 (72.7%)              | 0.277              |
| Married                | 383      | 141 (75.8%)       | 106 (62.0%)           | 3 (75.0%)                | 11 (50.0%)              | 0.006              |
| Treatment Arm, Placebo | 383      | 78 (41.9%)        | 68 (39.8%)            | 2 (50.0%)                | 7 (31.8%)               | 0.781              |
| ADAS-Cog, Baseline     | 383      | 24.6 (8.93)       | 21.0 (8.05)           | 20.5 (3.16)              | 15.0 (7.73)             | <0.001             |
| ADAS-Cog, 6 months     | 346      | 26.4 (9.99)       | 21.5 (7.61)           | 22.3 (2.09)              | 14.6 (8.21)             | <0.001             |
| ADAS-Cog, 12 months    | 324      | 29.2 (10.3)       | 22.3 (8.25)           | 24.8 (5.53)              | 17.1 (8.28)             | <0.001             |
| ADAS-Cog, 18 months    | 299      | 31.4 (12.3)       | 23.6 (10.1)           | 26.9 (8.47)              | 16.3 (8.41)             | <0.001             |



**eTable 5.** Participant Characteristics by Concomitant Medication Group for the HU Study Included in Analyses

|                     | N   | Both<br>N=7  | Ch<br>EI<br>N=2 | M<br>em<br>an<br>tin<br>e<br>N=88 | Ne<br>ith<br>er<br>N=92 | P<br>V<br>al<br>u<br>e |
|---------------------|-----|--------------|-----------------|-----------------------------------|-------------------------|------------------------|
| Age, Years          | 189 | 77<br>(636)  | 78<br>(283)     | 77.8<br>(754)                     | 79.0<br>(821)           | 0.762                  |
| Education           | 189 |              |                 |                                   |                         | 0.310                  |
| Less Than HS        |     | 2<br>(28.6%) | 0<br>(0.00%)    | 11<br>(12.5%)                     | 15<br>(16.3%)           |                        |
| HS Graduate         |     | 3<br>(42.9%) | 1<br>(50%)      | 46<br>(52.3%)                     | 57<br>(62.0%)           |                        |
| College Graduate    |     | 2<br>(28.6%) | 1<br>(50%)      | 31<br>(35.2%)                     | 20<br>(21.7%)           |                        |
| Race, White         | 189 | 7<br>(100%)  | 1<br>(50%)      | 82<br>(93.2%)                     | 86<br>(93.5%)           | 0.261                  |
| Ethnicity, Hispanic | 189 | 0<br>(0%)    | 0<br>(0%)       | 5<br>(5.68%)                      | 6<br>(6.52%)            | 1.000                  |

|                              |     |                            |                            |                        |                        |                   |
|------------------------------|-----|----------------------------|----------------------------|------------------------|------------------------|-------------------|
| Sex,<br>Female               | 189 | 3<br>(4<br>2.<br>9<br>%)   | 1<br>(5<br>0.<br>0<br>%)   | 57<br>(64<br>.8<br>%)  | 55<br>(59<br>.8<br>%)  | 0.<br>5<br>9<br>8 |
| Married                      | 189 | 7<br>(1<br>00<br>%)        | 1<br>(5<br>0.<br>0<br>%)   | 63<br>(71<br>.6<br>%)  | 62<br>(67<br>.4<br>%)  | 0.<br>2<br>3<br>8 |
| Treatment<br>Arm,<br>Placebo | 189 | 3<br>(4<br>2.<br>9<br>%)   | 0<br>(0.<br>00<br>%)       | 35<br>(39<br>.8<br>%)  | 28<br>(30<br>.4<br>%)  | 0.<br>4<br>0<br>6 |
| ADAS-<br>Cog,<br>Baseline    | 189 | 30<br>.2<br>(7.<br>96<br>) | 23<br>.7<br>(0.<br>00<br>) | 29.<br>9<br>(11<br>.7) | 23.<br>2<br>(10<br>.0) | 0.<br>0<br>0<br>1 |
| ADAS-<br>Cog, 6<br>months    | 141 | 26<br>.2<br>(7.<br>45<br>) | 24<br>.3<br>(0.<br>94<br>) | 26.<br>2<br>(11<br>.0) | 20.<br>6<br>(9.<br>34) | 0.<br>0<br>1<br>5 |
| ADAS-<br>Cog, 12<br>months   | 111 | 26<br>.5<br>(4.<br>13<br>) | 22<br>.0<br>(.)            | 27.<br>8<br>(11<br>.4) | 21.<br>2<br>(11<br>.2) | 0.<br>0<br>2<br>8 |
| ADAS-<br>Cog, 18<br>months   | 299 | 27<br>.2<br>(2.<br>04<br>) | 30<br>.7<br>(.)            | 25.<br>9<br>(8.<br>57) | 21.<br>5<br>(10<br>.8) | 0.<br>5<br>5<br>4 |

**eTable 6.** Participant Characteristics by Concomitant Medication Group for the LL Study Included in Analyses

|                        | <b>N</b> | <b>Both N=195</b> | <b>ChEI<br/>N=167</b> | <b>Memantine<br/>N=11</b> | <b>Neither<br/>N=13</b> | <b>P<br/>Value</b> |
|------------------------|----------|-------------------|-----------------------|---------------------------|-------------------------|--------------------|
| Age, Years             | 386      | 72.6 (9.85)       | 75.5 (8.31)           | 79.8 (8.13)               | 73.2 (9.33)             | 0.004              |
| Education              | 386      |                   |                       |                           |                         | 0.084              |
| Less Than HS           |          | 12 (6.15%)        | 24 (14.4%)            | 1 (9.09%)                 | 1 (7.69%)               |                    |
| HS Graduate            |          | 89 (45.6%)        | 83 (49.7%)            | 4 (36.4%)                 | 6 (46.2%)               |                    |
| College Graduate       |          | 94 (48.2%)        | 60 (35.9%)            | 6 (54.5%)                 | 6 (46.2%)               |                    |
| Race, White            | 386      | 179 (91.8%)       | 153 (91.6%)           | 10 (90.9%)                | 10 (76.9%)              | 0.275              |
| Ethnicity, Hispanic    | 386      | 12 (6.15%)        | 12 (7.19%)            | 0 (0.00%)                 | 0 (0.00%)               | 0.966              |
| Sex, Female            | 386      | 104 (53.3%)       | 108 (64.7%)           | 10 (90.9%)                | 6 (46.2%)               | 0.014              |
| Married                | 386      | 151 (77.4%)       | 112 (67.1%)           | 6 (54.5%)                 | 7 (53.8%)               | 0.027              |
| Treatment Arm, Placebo | 386      | 94 (48.2%)        | 86 (51.5%)            | 8 (72.7%)                 | 5 (38.5%)               | 0.339              |
| ADAS-Cog, Baseline     | 386      | 26.1 (10.5)       | 21.6 (8.93)           | 28.2 (9.81)               | 20.8 (6.72)             | <0.001             |
| ADAS-Cog, 6 months     | 326      | 28.5 (10.9)       | 21.7 (9.55)           | 29.4 (11.8)               | 22.1 (6.73)             | <0.001             |
| ADAS-Cog, 12 months    | 293      | 31.0 (12.6)       | 22.3 (8.54)           | 34.5 (11.1)               | 26.3 (10.4)             | <0.001             |
| ADAS-Cog, 18 months    | 252      | 31.7 (12.8)       | 24.9 (9.37)           | 35.0 (19.6)               | 27.7 (9.40)             | <0.001             |

**eTable 7.** Participant Characteristics by Concomitant Medication Group for the NS Study Included in Analyses

|                        | <b>N</b> | <b>Both N=1</b> | <b>ChEI N=287</b> | <b>Neither N=56</b> | <b>P Value</b> |
|------------------------|----------|-----------------|-------------------|---------------------|----------------|
| Age, Years             | 344      | 55.0 (.)        | 73.5 (7.60)       | 76.3 (7.50)         | 0.002          |
| Education              | 344      |                 |                   |                     | 0.198          |
| Less Than HS           |          | 0 (0.00%)       | 34 (11.8%)        | 12 (21.4%)          |                |
| HS Graduate            |          | 0 (0.00%)       | 141 (49.1%)       | 25 (44.6%)          |                |
| College Graduate       |          | 1 (100%)        | 112 (39.0%)       | 19 (33.9%)          |                |
| Race, White            | 344      | 1 (100%)        | 262 (91.3%)       | 48 (85.7%)          | 0.290          |
| Ethnicity, Hispanic    | 344      | 0 (0.00%)       | 13 (4.53%)        | 6 (10.7%)           | 0.150          |
| Sex, Female            | 344      | 1 (100%)        | 148 (51.6%)       | 34 (60.7%)          | 0.243          |
| Married                | 344      | 0 (0.00%)       | 229 (79.8%)       | 35 (62.5%)          | 0.003          |
| Treatment Arm, Placebo | 344      | 1 (100%)        | 92 (32.1%)        | 17 (30.4%)          | 0.425          |
| ADAS-Cog, Baseline     | 344      | 45.3 (.)        | 24.2 (9.55)       | 22.3 (9.64)         | 0.034          |
| ADAS-Cog, 6 months     | 269      | . (.)           | 26.3 (10.8)       | 20.8 (11.7)         | 0.005          |
| ADAS-Cog, 12 months    | 231      | . (.)           | 27.6 (10.6)       | 21.5 (10.9)         | 0.002          |

**eTable 8.** Participant Characteristics by Concomitant Medication Group for the PR Study Included in Analyses

|                        | <b>N</b> | <b>ChEI N=19</b> | <b>Neither N=116</b> | <b>P Value</b> |
|------------------------|----------|------------------|----------------------|----------------|
| Age, Years             | 135      | 72.6 (5.13)      | 72.3 (7.94)          | 0.838          |
| Education              | 135      |                  |                      | 0.510          |
| Less Than HS           |          | 1 (5.26%)        | 14 (12.1%)           |                |
| HS Graduate            |          | 13 (68.4%)       | 61 (52.6%)           |                |
| College Graduate       |          | 5 (26.3%)        | 41 (35.3%)           |                |
| Race, White            | 135      | 19 (100%)        | 110 (94.8%)          | 0.594          |
| Ethnicity, Hispanic    | 135      | 0 (0.00%)        | 5 (4.31%)            | 1.000          |
| Sex, Female            | 135      | 12 (63.2%)       | 56 (48.3%)           | 0.339          |
| Married                | 135      | 16 (84.2%)       | 97 (83.6%)           | 1.000          |
| Treatment Arm, Placebo | 135      | 9 (47.4%)        | 58 (50.0%)           | 1.000          |
| ADAS-Cog, Baseline     | 135      | 21.3 (8.05)      | 21.9 (10.2)          | 0.756          |
| ADAS-Cog, 6 months     | 117      | 24.1 (11.2)      | 24.1 (11.6)          | 0.994          |
| ADAS-Cog, 12 months    | 99       | 27.1 (12.9)      | 27.6 (12.9)          | 0.872          |
| ADAS-Cog, 18 months    | 87       | 25.6 (12.6)      | 27.7 (13.7)          | 0.540          |

**eTable 9.** Participant Characteristics by Concomitant Medication Group for the SL Study Included in Analyses

|                        | <b>N</b> | <b>ChEI<br/>N=2</b> | <b>Neither N=314</b> | <b>P Value</b> |
|------------------------|----------|---------------------|----------------------|----------------|
| Age, Years             | 316      | 61.0 (0.00)         | 73.0 (8.01)          | <0.001         |
| Education              | 316      |                     |                      | 0.042          |
| Less Than HS           |          | 0 (0.00%)           | 90 (28.7%)           |                |
| HS Graduate            |          | 0 (0.00%)           | 161 (51.3%)          |                |
| College Graduate       |          | 2 (100%)            | 63 (20.1%)           |                |
| Race, White            | 316      | 1 (50.0%)           | 277 (88.2%)          | 0.226          |
| Ethnicity, Hispanic    | 316      | 1 (50.0%)           | 12 (3.82%)           | 0.081          |
| Sex, Female            | 316      | 1 (50.0%)           | 205 (65.3%)          | 1.000          |
| Married                | 316      | 2 (100%)            | 228 (72.6%)          | 1.000          |
| Treatment Arm, Placebo | 316      | 1 (50.0%)           | 77 (24.5%)           | 0.433          |
| ADAS-Cog, Baseline     | 316      | 28.8 (3.06)         | 39.1 (10.8)          | 0.111          |
| ADAS-Cog, 6 months     | 238      | 29.5 (1.18)         | 40.4 (12.0)          | 0.001          |
| ADAS-Cog, 12 months    | 180      | 44.0 (3.30)         | 43.5 (12.5)          | 0.862          |
| ADAS-Cog, 18 months    | 129      | 50.0 (.)            | 44.6 (12.8)          | .              |
| ADAS-Cog, 24 months    | 98       | 41.0 (.)            | 45.5 (12.9)          | .              |

**eTable 10.** Participant Characteristics by Concomitant Medication Group for the VN Study Included in Analyses

|                        | <b>N</b> | <b>Both N=197</b> | <b>ChEI<br/>N=67</b> | <b>Memantine<br/>N=11</b> | <b>Neither<br/>N=6</b> | <b>P<br/>Value</b> |
|------------------------|----------|-------------------|----------------------|---------------------------|------------------------|--------------------|
| Age, Years             | 281      | 74.8 (8.36)       | 77.9 (6.55)          | 76.2 (5.98)               | 79.2 (5.78)            | 0.026              |
| Education              | 281      |                   |                      |                           |                        | 0.251              |
| Less Than HS           |          | 22 (11.2%)        | 16 (23.9%)           | 1 (9.09%)                 | 0 (0.00%)              |                    |
| HS Graduate            |          | 95 (48.2%)        | 30 (44.8%)           | 6 (54.5%)                 | 3 (50.0%)              |                    |
| College Graduate       |          | 80 (40.6%)        | 21 (31.3%)           | 4 (36.4%)                 | 3 (50.0%)              |                    |
| Race, White            | 281      | 180 (91.4%)       | 60 (89.6%)           | 11 (100%)                 | 6 (100%)               | 0.798              |
| Ethnicity, Hispanic    | 281      | 6 (3.05%)         | 2 (2.99%)            | 2 (18.2%)                 | 0 (0.00%)              | 0.137              |
| Sex, Female            | 281      | 108 (54.8%)       | 44 (65.7%)           | 6 (54.5%)                 | 4 (66.7%)              | 0.439              |
| Married                | 281      | 148 (75.1%)       | 42 (62.7%)           | 10 (90.9%)                | 5 (83.3%)              | 0.114              |
| Treatment Arm, Placebo | 281      | 103 (52.3%)       | 32 (47.8%)           | 6 (54.5%)                 | 4 (66.7%)              | 0.823              |
| ADAS-Cog, Baseline     | 281      | 30.1 (9.18)       | 26.4 (8.62)          | 30.8 (8.05)               | 30.6 (9.48)            | 0.030              |
| ADAS-Cog, 6 months     | 197      | 31.9 (9.13)       | 27.8 (8.62)          | 33.3 (7.46)               | 30.5 (4.76)            | 0.042              |
| ADAS-Cog, 12 months    | 166      | 35.0 (10.2)       | 30.0 (11.7)          | 33.5 (10.4)               | 34.1 (1.85)            | 0.087              |
| ADAS-Cog, 18 months    | 122      | 35.3 (10.5)       | 32.3 (9.96)          | 31.2 (3.57)               | 40.2 (2.59)            | 0.300              |
| ADAS-Cog, 24 months    | 104      | 36.8 (10.7)       | 30.2 (10.6)          | 38.0 (8.82)               | 35.2 (9.67)            | 0.048              |

**eTable 11.** Participant Characteristics by Concomitant Medication Group for the ADNI Study Included in Analyses

|                        | <b>N</b> | <b>Both<br/>N=109</b> | <b>ChEI<br/>N=59</b> | <b>Memantine<br/>N=5</b> | <b>Neither<br/>N=6</b> | <b>P<br/>Value</b> |
|------------------------|----------|-----------------------|----------------------|--------------------------|------------------------|--------------------|
| Age, Years             | 179      | 74.1 (8.15)           | 76.9 (6.23)          | 78.0 (9.43)              | 77.3 (5.09)            | 0.080              |
| Education              | 179      |                       |                      |                          |                        | 0.015              |
| Less Than HS           |          | 5 (4.59%)             | 9 (15.3%)            | 2 (40.0%)                | 2 (33.3%)              |                    |
| HS Graduate            |          | 43 (39.4%)            | 24 (40.7%)           | 2 (40.0%)                | 2 (33.3%)              |                    |
| College Graduate       |          | 61 (56.0%)            | 26 (44.1%)           | 1 (20.0%)                | 2 (33.3%)              |                    |
| Race, White            | 179      | 102 (93.6%)           | 56 (94.9%)           | 5 (100%)                 | 5 (83.3%)              | 0.608              |
| Ethnicity, Hispanic    | 179      | 2 (1.83%)             | 0 (0.00%)            | 0 (0.00%)                | 1 (16.7%)              | 0.168              |
| Sex, Female            | 179      | 42 (38.5%)            | 31 (52.5%)           | 5 (100%)                 | 5 (83.3%)              | 0.003              |
| Married                | 179      | 98 (89.9%)            | 45 (76.3%)           | 2 (40.0%)                | 2 (33.3%)              | <0.001             |
| Treatment Arm, Placebo | 179      | 109 (100%)            | 59 (100%)            | 5 (100%)                 | 6 (100%)               | .                  |
| ADAS-Cog, Baseline     | 179      | 19.2 (6.29)           | 17.8 (5.85)          | 20.7 (9.29)              | 17.9 (9.95)            | 0.499              |
| ADAS-Cog, 6 months     | 169      | 21.5 (7.89)           | 19.7 (7.30)          | 20.7 (7.94)              | 20.2 (12.6)            | 0.607              |
| ADAS-Cog, 12 months    | 150      | 23.0 (8.98)           | 21.7 (8.74)          | 21.2 (7.11)              | 23.2 (15.2)            | 0.856              |
| ADAS-Cog, 24 months    | 127      | 28.9 (12.3)           | 26.7 (11.5)          | 26.5 (8.17)              | 30.2 (13.2)            | 0.795              |



**eFigure 1.** Funnel Plot of Estimates (estimated annual rates of decline) vs Precision (standard error) Across All Studies

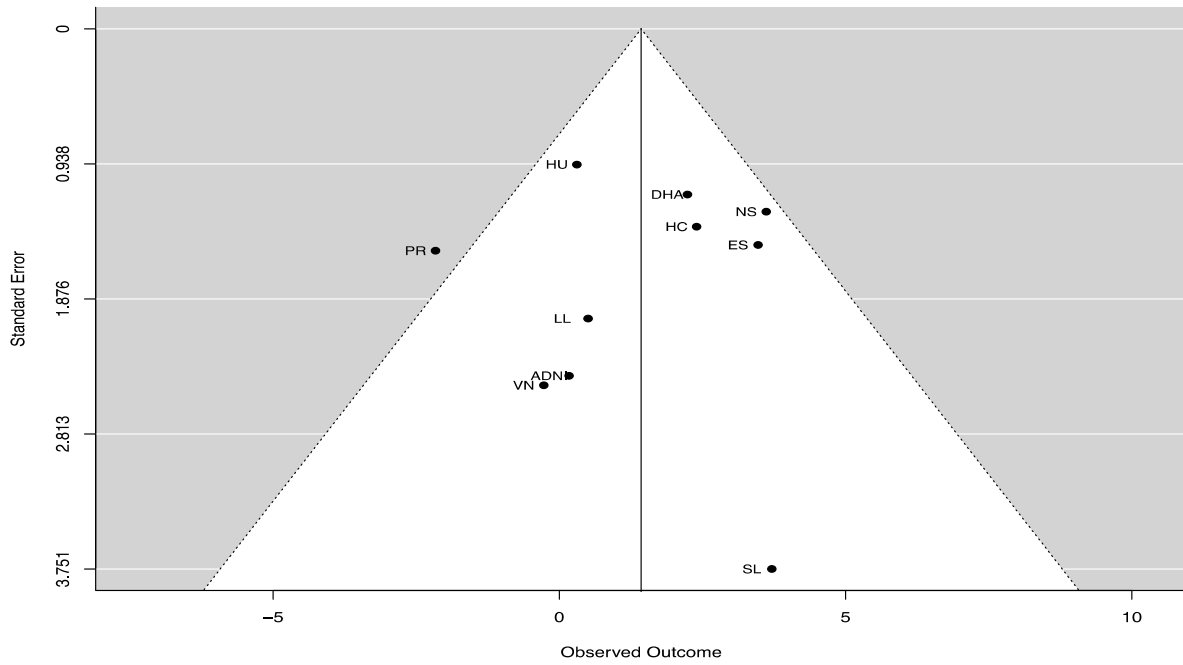

One study (PR) was identified as an outlier but was not excluded from analysis. Although there was considerable heterogeneity among studies, no evidence of low precision studies favoring one group being excluded from publication was seen for rates of progression.

**eFigure 2.** Rates of Decline for Participants Taking ChEIs, Memantine, or Both Compared to Rates of Decline for Participants Taking Neither Medication, Excluding the Observational ADNI Study

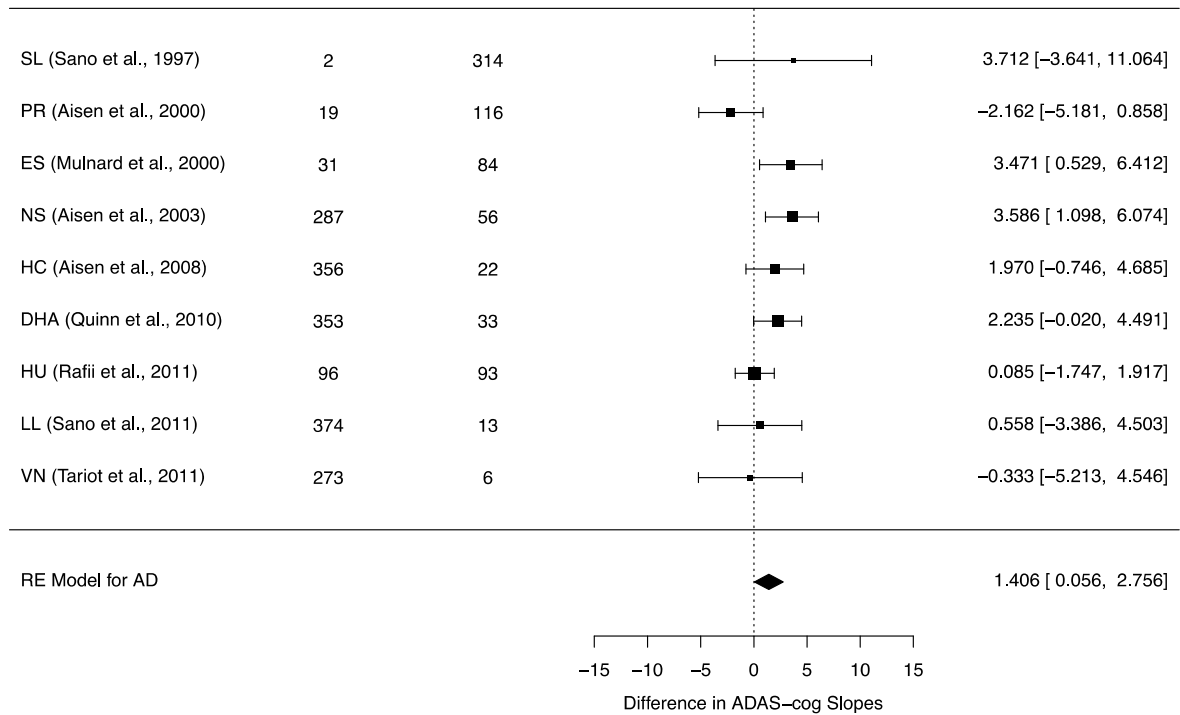

Rates of decline for individual studies were combined using random effects meta-analysis. Vertical reference line indicates no difference between participants taking medication and participants not taking medication; size of squares is proportional to the weight of the study in the analysis. AD=Alzheimer's disease; ADNI=Alzheimer's Disease Neuroimaging Initiative; CI=confidence interval.

**eFigure 3.** Effect Sizes for Rates of Decline of Participants Taking ChEIs, Memantine, or Both Compared to Rates of Decline for Participants Taking Neither Medication, Excluding the Observational ADNI Study

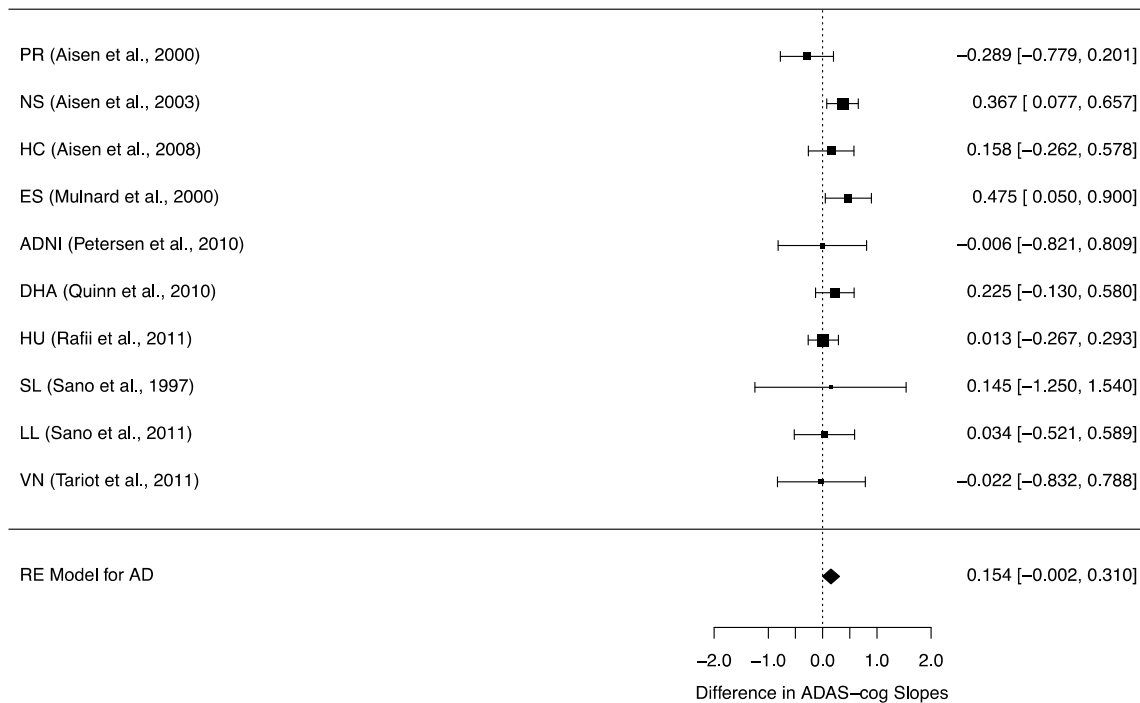

Effect sizes for individual studies were combined using random effects meta-analysis. Vertical reference line indicates no difference between participants taking medication and participants not taking medication; size of squares is proportional to the weight of the study in the analysis. AD=Alzheimer's disease; ADNI=Alzheimer's Disease Neuroimaging Initiative; CI=confidence interval.

**eFigure 4.** Rates of Decline for Participants Taking ChEIs Only Compared to Rates of Decline for Participants Taking Neither ChEIs Nor Memantine

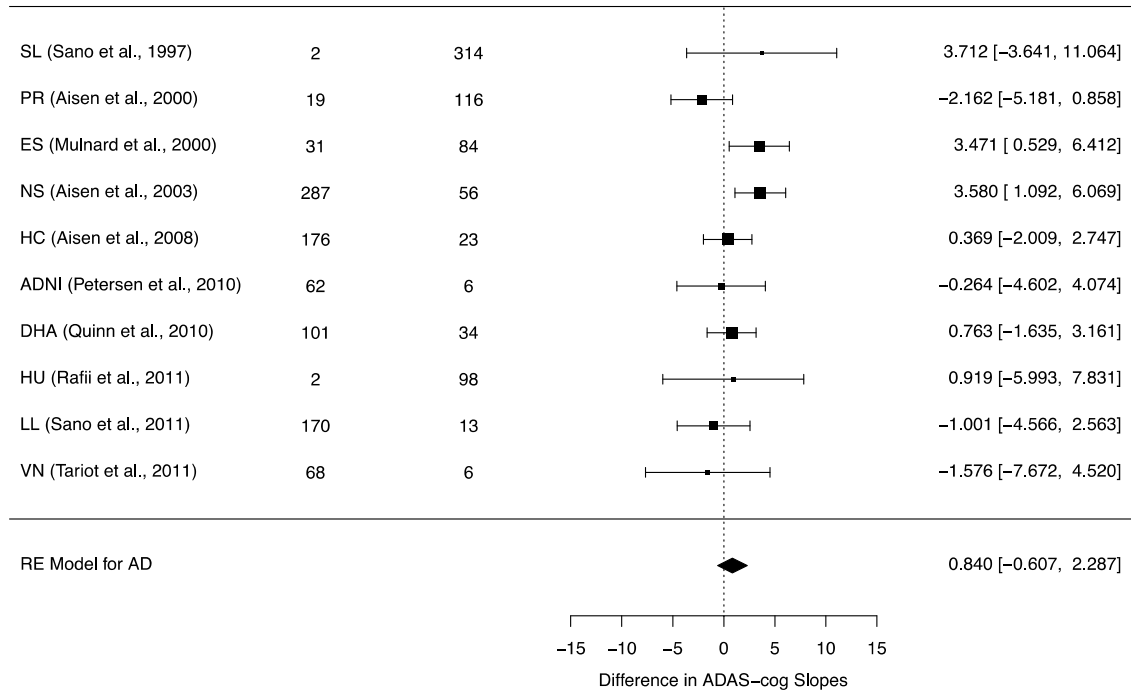

Rates of decline for individual studies were combined using random effects meta-analysis. Vertical reference line indicates no difference between participants taking medication and participants not taking medication; size of squares is proportional to the weight of the study in the analysis. AD=Alzheimer's disease; CI=confidence interval.

**eFigure 5.** Rates of Decline for Participants Taking Memantine or Both Memantine and ChEIs Compared to Rates of Decline for Participants Taking ChEIs or Neither

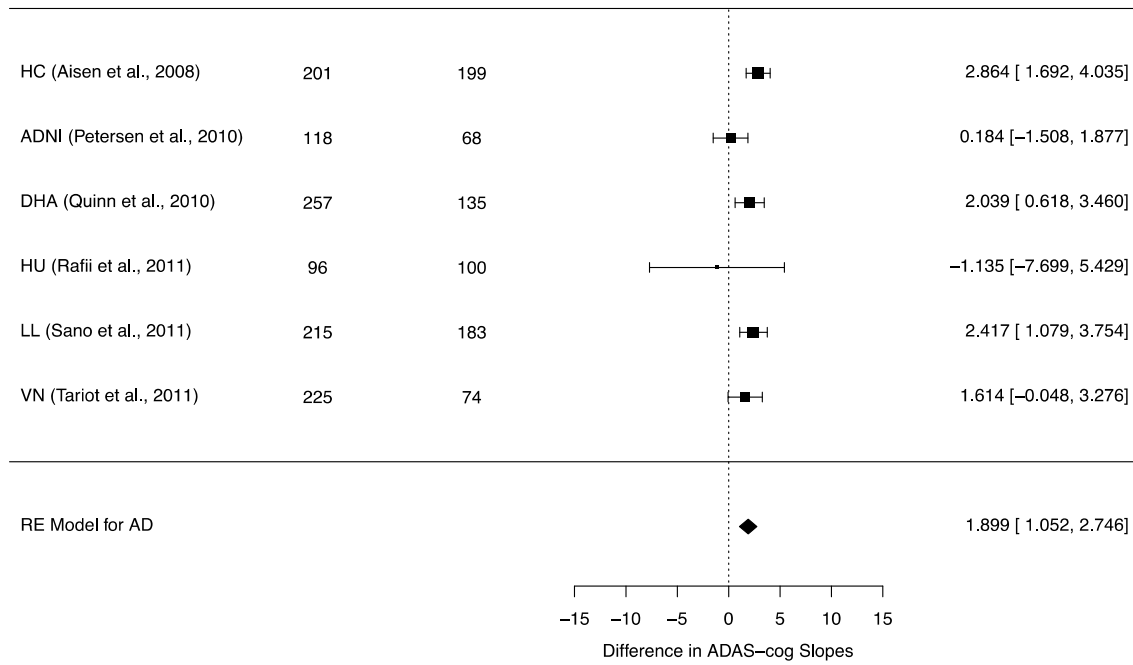

Rates of decline for individual studies were combined using random effects meta-analysis. Vertical reference line indicates no difference between participants taking medication and participants not taking medication; size of squares is proportional to the weight of the study in the analysis. AD=Alzheimer’s disease; CI=confidence interval.

## eReferences

1. Brown H, Prescott R. *Applied Mixed Models in Medicine*. 2nd ed. Chichester: Wiley; 2006.
2. Bates D, Mächler M, Bolker B, Walker S. Fitting Linear Mixed-Effects Models Using lme4. *J Stat Softw*. 2015;67(1):1-48.
3. *R: A Language and Environment for Statistical Computing* [computer program]. Vienna, Austria: R Foundation for Statistical Computing; 2016.
4. Ferris SH, Mackell JA, Mohs R, et al. A multicenter evaluation of new treatment efficacy instruments for Alzheimer's disease clinical trials: overview and general results. *Alzheimer Dis Assoc Disord*. 1997;11 Suppl 2:S1-12.
5. Sano M, Ernesto C, Thomas RG, et al. A controlled trial of selegiline, alpha-tocopherol, or both as treatment for Alzheimer's disease. *N Engl J Med*. 1997;336(17):1216-1222.
6. Teri L, Logsdon RG, Peskind E, et al. Treatment of agitation in AD: a randomized, placebo-controlled clinical trial. *Neurology*. 2000;55(9):1271-1278.
7. Aisen PS, Davis KL, Berg JD, et al. A randomized controlled trial of prednisone in Alzheimer's disease. *Neurology*. 2000;54(3):588-593.
8. Mulnard RA, Cotman CW, Kawas C, et al. Estrogen replacement therapy for treatment of mild to moderate Alzheimer disease: a randomized controlled trial. *JAMA*. 2000;283(8):1007-1015.
9. Singer C, Tractenberg RE, Kaye J, et al. A multicenter, placebo-controlled trial of melatonin for sleep disturbance in Alzheimer's disease. *Sleep*. 2003;26(7):893-901.

10. Aisen PS, Schafer KA, Grundman M, et al. Effects of rofecoxib or naproxen vs placebo on Alzheimer disease progression: a randomized controlled trial. *JAMA*. 2003;289(21):2819-2826.
11. Petersen RC, Thomas RG, Grundman M, et al. Vitamin E and donepezil for the treatment of mild cognitive impairment. *N Engl J Med*. 2005;352(23):2379-2388.
12. Tariot PN, Raman R, Jakimovich L, et al. Divalproex sodium in nursing home residents with possible or probable Alzheimer disease complicated by agitation: a randomized, controlled trial. *Am J Geriatr Psychiatry*. 2005;13(11):942-949.
13. Ferris SH, Aisen PS, Cummings J, et al. ADCS Prevention Instrument Project: overview and initial results. *Alzheimer Dis Assoc Disord*. 2006;20(4 Suppl 3):S109-123.
14. Sano M, Bell KL, Galasko D, et al. A randomized, double-blind, placebo-controlled trial of simvastatin to treat Alzheimer disease. *Neurology*. 2011;77(6):556-563.
15. Tariot PN, Schneider LS, Cummings J, et al. Chronic divalproex sodium to attenuate agitation and clinical progression of Alzheimer disease. *Arch Gen Psychiatry*. 2011;68(8):853-861.
16. Aisen PS, Schneider LS, Sano M, et al. High-dose B vitamin supplementation and cognitive decline in Alzheimer disease: a randomized controlled trial. *JAMA*. 2008;300(15):1774-1783.
17. Rafii MS, Walsh S, Little JT, et al. A phase II trial of huperzine A in mild to moderate Alzheimer disease. *Neurology*. 2011;76(16):1389-1394.

18. Quinn JF, Raman R, Thomas RG, et al. Docosahexaenoic acid supplementation and cognitive decline in Alzheimer disease: a randomized trial. *JAMA*. 2010;304(17):1903-1911.
19. Petersen RC, Aisen PS, Beckett LA, et al. Alzheimer's Disease Neuroimaging Initiative (ADNI): clinical characterization. *Neurology*. 2010;74(3):201-209.



**eAppendix 2.** Association of Concomitant Use of Cholinesterase Inhibitors or Memantine With Cognitive Decline in Alzheimer Clinical Trials: Source Code and Output

BIostatistician: RICHARD KENNEDY

AUGUST 14, 2018

**Rates of Decline Across Studies**

**Mixed Effects Model**

```
## Study Name
## [1] "ADNI"
## Full Mixed Effects Model
## Linear mixed model fit by maximum likelihood ['lmerMod']
## Formula: ADAS ~ AGE + EDUCATION + group + month + group:month + (month |
##   UID)
## Data: mixed.data
##
##   AIC   BIC logLik deviance df.resid
## 3946.4 3990.8 -1963.2 3926.4    615
##
## Scaled residuals:
##   Min     1Q  Median     3Q    Max
## -2.28808 -0.43372 -0.03786  0.41513  2.54026
##
## Random effects:
## Groups Name      Variance Std.Dev. Corr
## UID (Intercept) 32.43   5.695
##   month      19.39   4.403  0.46
## Residual      10.82   3.290
## Number of obs: 625, groups: UID, 179
##
## Fixed effects:
##           Estimate Std. Error t value
## (Intercept) 12.91213   5.71935  2.258
## AGE          0.05498   0.06101  0.901
## EDUCATION    0.05426   0.14712  0.369
## group1       0.69923   2.65425  0.263
## month        4.87580   2.37431  2.054
## group1:month 0.16899   2.40962  0.070
##
## Correlation of Fixed Effects:
##           (Intr) AGE  EDUCAT group1 month
## AGE      -0.836
## EDUCATION -0.340  0.032
## group1   -0.433  0.047 -0.142
```

```
## month      0.061  0.007  0.039 -0.175
## group1:mnth -0.059 -0.007 -0.040  0.178 -0.985
## P Value for Full vs. Reduced Model
## [1] 0.9441329
```

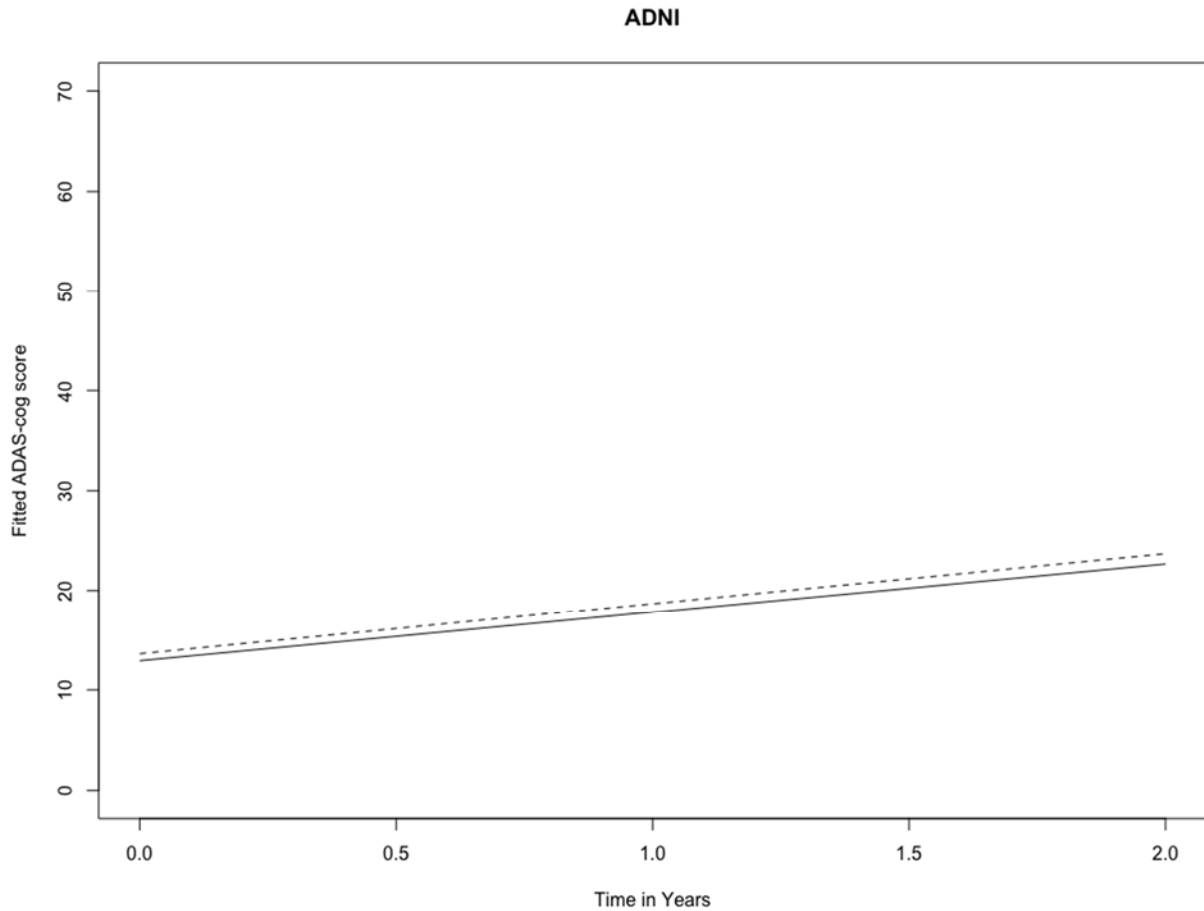

```
## Study Name
## [1] "DHA"
## Full Mixed Effects Model
## Linear mixed model fit by maximum likelihood ['lmerMod']
## Formula: ADAS ~ AGE + EDUCATION + group + month + group:month + (month |
##   UID)
## Data: mixed.data
##
##   AIC   BIC logLik deviance df.resid
## 8300.2 8351.8 -4140.1  8280.2   1280
##
## Scaled residuals:
##   Min     1Q  Median     3Q    Max
## -2.54915 -0.48624 -0.01167  0.47009  2.70408
##
```

```

## Random effects:
## Groups Name      Variance Std.Dev. Corr
## UID (Intercept) 61.39  7.835
##   month      22.69  4.763  0.63
## Residual      11.51  3.393
## Number of obs: 1290, groups: UID, 386
##
## Fixed effects:
##      Estimate Std. Error t value
## (Intercept) 9.16954  4.81603  1.904
## AGE         0.13973  0.04805  2.908
## EDUCATION  -0.19013  0.14829 -1.282
## group1      7.00299  1.52905  4.580
## month       3.20138  1.10153  2.906
## group1:month 2.23547  1.15064  1.943
##
## Correlation of Fixed Effects:
##      (Intr) AGE  EDUCAT group1 month
## AGE      -0.848
## EDUCATION -0.557 0.149
## group1   -0.359 0.082 0.013
## month    0.095 -0.005 0.004 -0.294
## group1:mnth -0.085 -0.001 -0.009 0.306 -0.957
## P Value for Full vs. Reduced Model
## [1] 0.0529316

```

### DHA

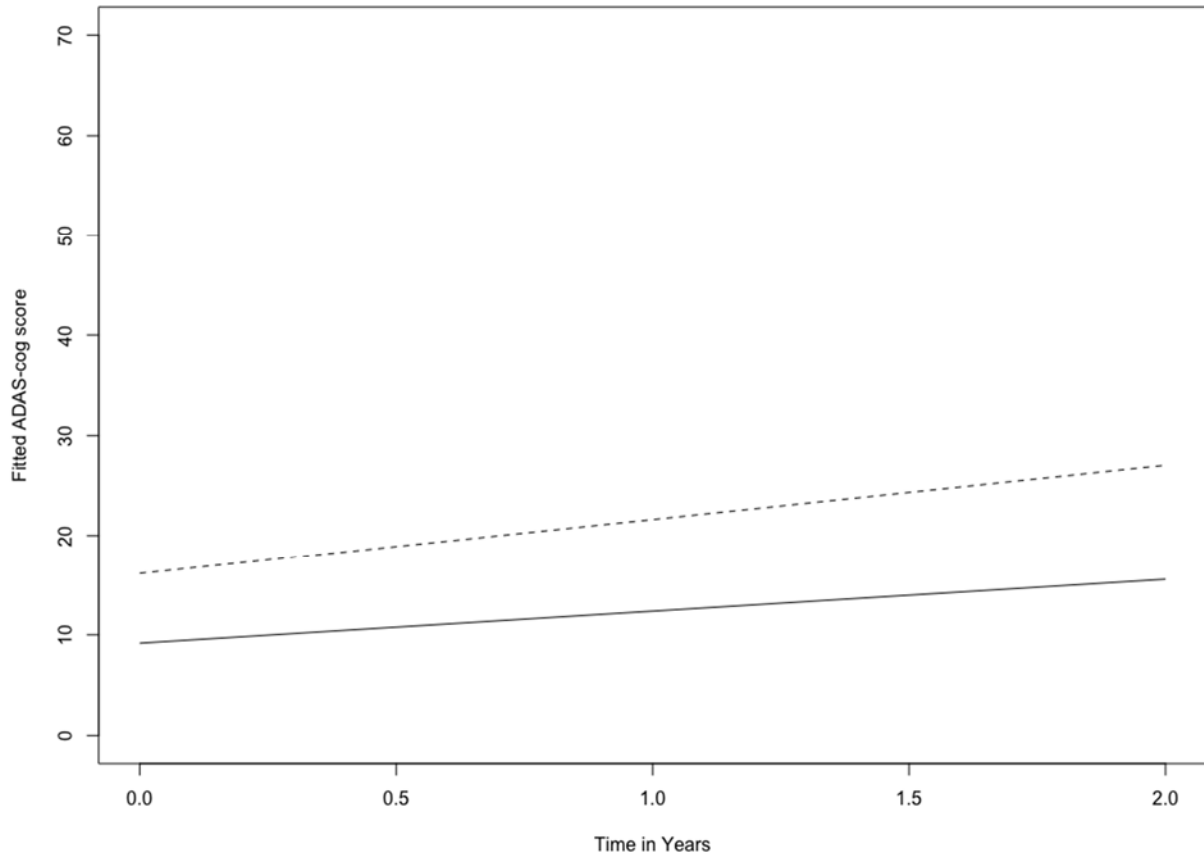

```
## Study Name
## [1] "ES"
## Full Mixed Effects Model
## Linear mixed model fit by maximum likelihood ['lmerMod']
## Formula: ADAS ~ AGE + EDUCATION + group + month + group:month + (month |
##   UID)
## Data: mixed.data
##
##   AIC   BIC logLik deviance df.resid
## 2004.6 2041.7 -992.3 1984.6   292
##
## Scaled residuals:
##   Min     1Q  Median     3Q      Max
## -2.47336 -0.52156 -0.01569  0.48441  2.62754
##
## Random effects:
## Groups Name      Variance Std.Dev. Corr
## UID   (Intercept) 62.40   7.899
##      month      15.68   3.959  0.87
## Residual          13.66   3.696
```

```

## Number of obs: 302, groups: UID, 115
##
## Fixed effects:
##      Estimate Std. Error t value
## (Intercept) 14.9766   9.8512  1.520
## AGE          0.1429   0.1177  1.215
## EDUCATION   -0.1100   0.2496 -0.441
## group1      -0.1170   1.8339 -0.064
## month        4.8566   0.7858  6.181
## group1:month 3.4706   1.5006  2.313
##
## Correlation of Fixed Effects:
##      (Intr) AGE  EDUCAT group1 month
## AGE          -0.950
## EDUCATION    -0.442  0.155
## group1       -0.061  0.059 -0.135
## month         0.023 -0.002 -0.007 -0.106
## group1:mnth -0.018  0.004  0.012  0.208 -0.524
## P Value for Full vs. Reduced Model
## [1] 0.02347949

```

ES

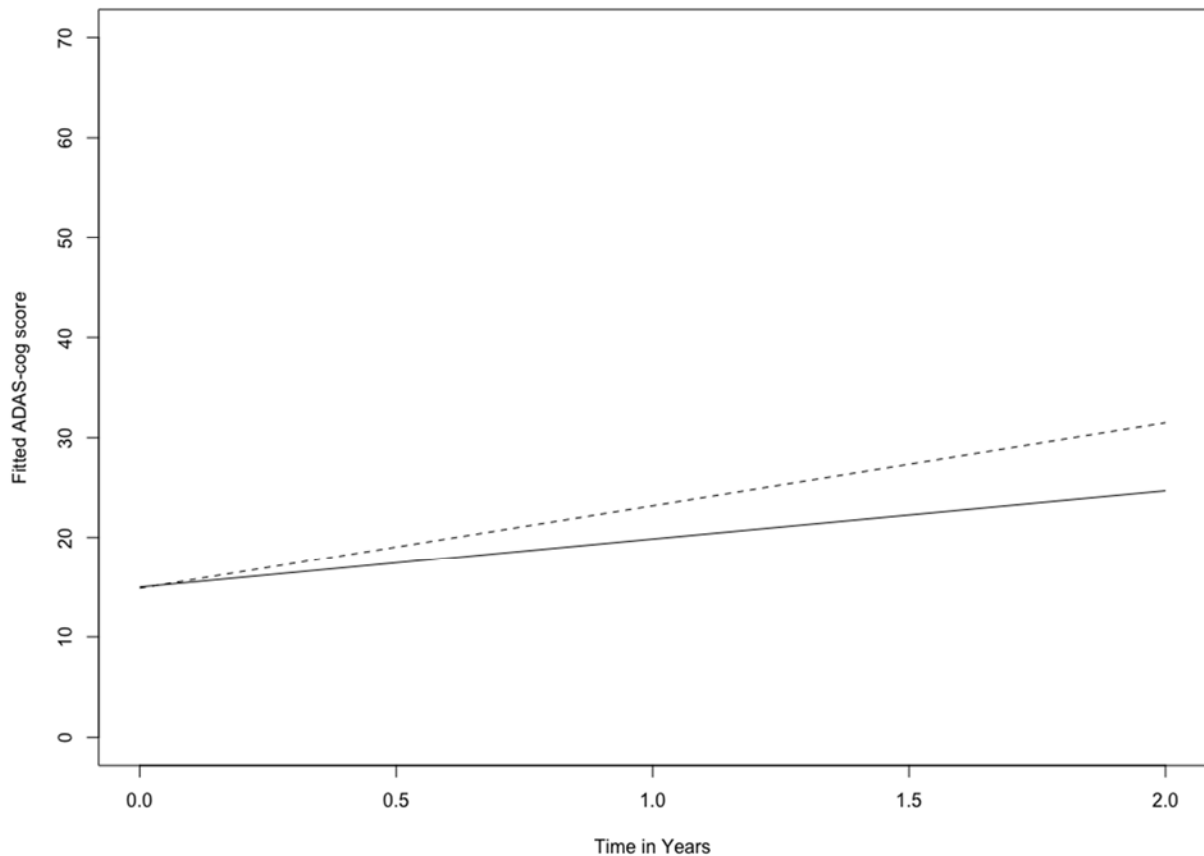

```

## Study Name
## [1] "HC"
## Full Mixed Effects Model
## Linear mixed model fit by maximum likelihood ['lmerMod']
## Formula: ADAS ~ AGE + EDUCATION + group + month + group:month + (month |
##   UID)
## Data: mixed.data
##
##   AIC   BIC logLik deviance df.resid
## 8739.9 8792.0 -4360.0 8719.9   1342
##
## Scaled residuals:
##   Min     1Q   Median     3Q      Max
## -3.2002 -0.4998 -0.0318  0.4747  4.1500
##
## Random effects:
## Groups Name      Variance Std.Dev. Corr
## UID   (Intercept) 57.55   7.586
##   month      17.18   4.145  0.51
## Residual      13.38   3.657
## Number of obs: 1352, groups: UID, 383
##
## Fixed effects:
##           Estimate Std. Error t value
## (Intercept) 8.46425  4.83373  1.751
## AGE          0.16653  0.05377  3.097
## EDUCATION   -0.43377  0.13749 -3.155
## group1       7.46975  1.82102  4.102
## month        2.07515  1.34071  1.548
## group1:month 2.39751  1.37374  1.745
##
## Correlation of Fixed Effects:
##      (Intr) AGE  EDUCAT group1 month
## AGE      -0.855
## EDUCATION -0.454  0.100
## group1   -0.243 -0.096 -0.077
## month    0.056 -0.011  0.004 -0.129
## group1:mnth -0.053  0.008 -0.004  0.134 -0.976
## P Value for Full vs. Reduced Model
## [1] 0.08138587

```

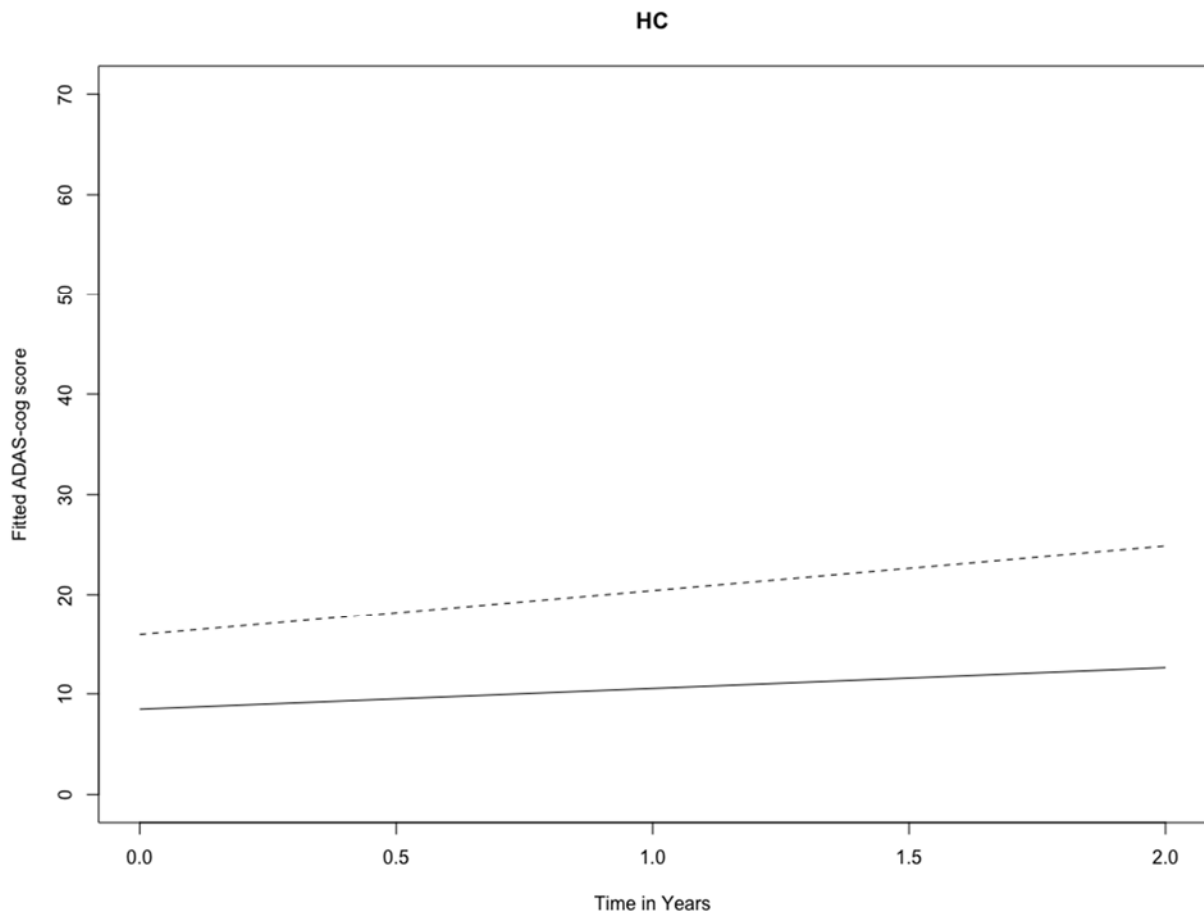

```
## Study Name
## [1] "HU"
## Full Mixed Effects Model
## Linear mixed model fit by maximum likelihood ['lmerMod']
## Formula: ADAS ~ AGE + EDUCATION + group + month + group:month + (month |
##   UID)
## Data: mixed.data
##
##   AIC   BIC logLik deviance df.resid
## 3184.0 3225.5 -1582.0 3164.0   460
##
## Scaled residuals:
##   Min     1Q  Median     3Q    Max
## -2.1772 -0.4950 -0.0242  0.4914  2.7602
##
## Random effects:
## Groups Name      Variance Std.Dev. Corr
## UID   (Intercept) 96.145   9.805
##      month        2.761   1.662   1.00
## Residual          15.926   3.991
```

```

## Number of obs: 470, groups: UID, 189
##
## Fixed effects:
##      Estimate Std. Error t value
## (Intercept) 30.50647  8.52768  3.577
## AGE        -0.04086  0.09842 -0.415
## EDUCATION  -0.35447  0.23224 -1.526
## group1     6.69647  1.53576  4.360
## month      1.52377  0.69837  2.182
## group1:month 0.30563  0.94194  0.324
##
## Correlation of Fixed Effects:
##      (Intr) AGE  EDUCAT group1 month
## AGE      -0.926
## EDUCATION -0.393  0.042
## group1   -0.120  0.072 -0.103
## month    0.014 -0.011 -0.004 -0.016
## group1:mnth -0.012  0.005  0.013  0.031 -0.741
## P Value for Full vs. Reduced Model
## [1] 0.7457864

```

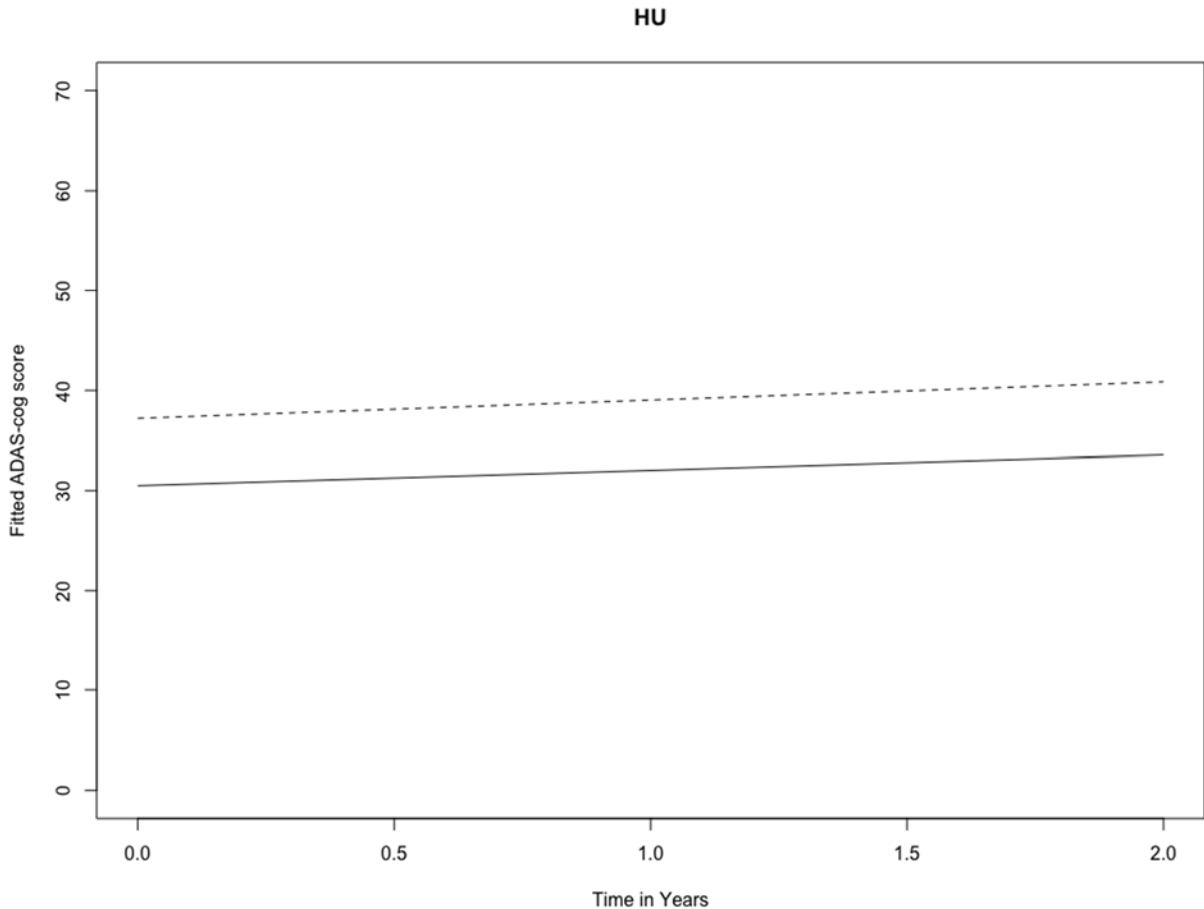



```

## Study Name
## [1] "LL"
## Full Mixed Effects Model
## Linear mixed model fit by maximum likelihood ['lmerMod']
## Formula: ADAS ~ AGE + EDUCATION + group + month + group:month + (month |
##   UID)
## Data: mixed.data
##
##   AIC   BIC logLik deviance df.resid
## 8335.5 8386.9 -4157.7 8315.5   1247
##
## Scaled residuals:
##   Min     1Q  Median     3Q      Max
## -2.44423 -0.48247 -0.00702  0.46690  2.90282
##
## Random effects:
## Groups Name      Variance Std.Dev. Corr
## UID   (Intercept) 86.68   9.310
##   month      19.76   4.445  0.40
## Residual      13.64   3.693
## Number of obs: 1257, groups: UID, 386
##
## Fixed effects:
##           Estimate Std. Error t value
## (Intercept) 19.639525  5.512140  3.563
## AGE         -0.006826  0.054198 -0.126
## EDUCATION    0.078098  0.158249  0.494
## group1       3.692815  2.788784  1.324
## month        5.048043  1.914305  2.637
## group1:month 0.376432  1.942334  0.194
##
## Correlation of Fixed Effects:
##      (Intr) AGE  EDUCAT group1 month
## AGE         -0.759
## EDUCATION   -0.490  0.095
## group1      -0.485 -0.017  0.021
## month        0.056 -0.003  0.002 -0.108
## group1:mnth -0.054  0.002 -0.003  0.110 -0.986
## P Value for Full vs. Reduced Model
## [1] 0.8464143

```

LL

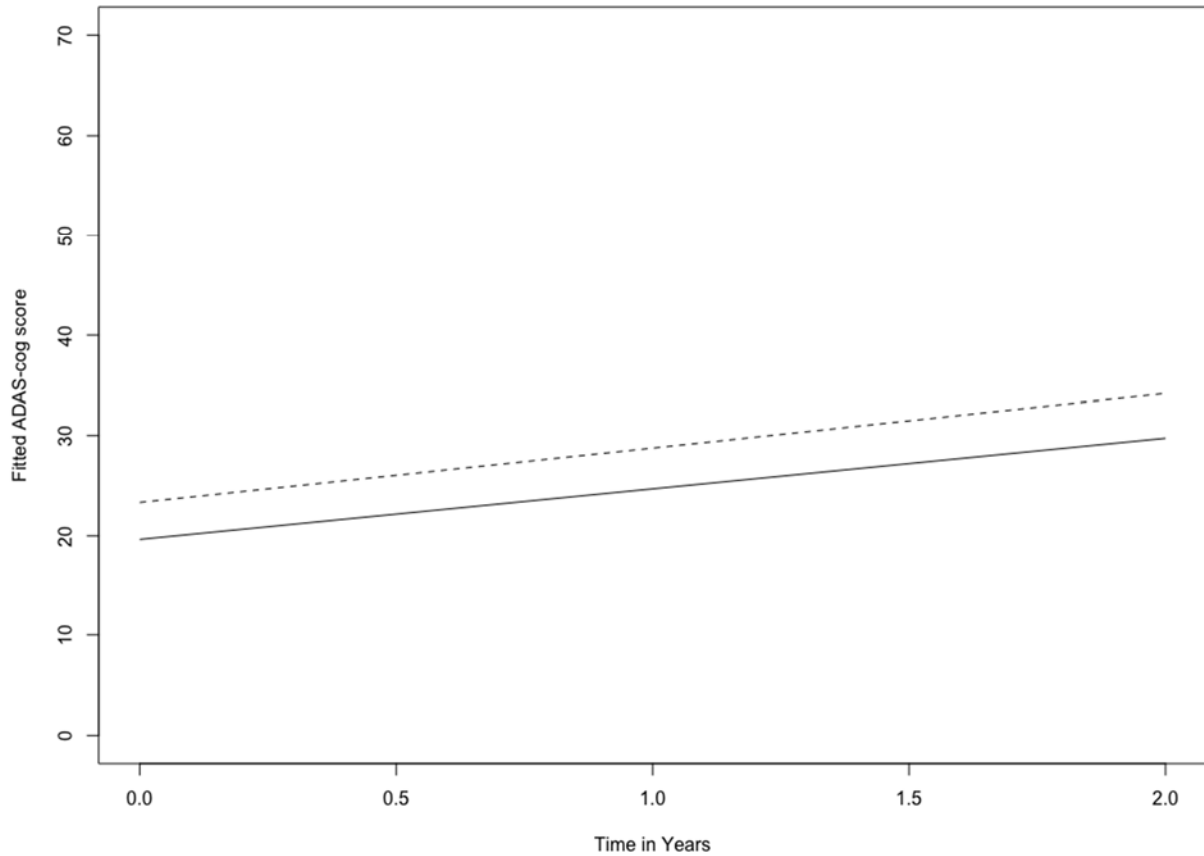

```
## Study Name
## [1] "NS"
## Full Mixed Effects Model
## Linear mixed model fit by maximum likelihood ['lmerMod']
## Formula: ADAS ~ AGE + EDUCATION + group + month + group:month + (month |
##   UID)
## Data: mixed.data
##
##   AIC   BIC logLik deviance df.resid
## 5716.7 5764.1 -2848.4 5696.7    834
##
## Scaled residuals:
##   Min     1Q  Median     3Q    Max
## -2.5777 -0.4560 -0.0277  0.4424  2.6088
##
## Random effects:
##   Groups Name   Variance Std.Dev. Corr
##   UID   (Intercept) 80.04   8.946
##   month      22.24   4.715   0.47
## Residual      14.06   3.749
```

```

## Number of obs: 844, groups: UID, 344
##
## Fixed effects:
##      Estimate Std. Error t value
## (Intercept) 32.72073   6.02192   5.434
## AGE         -0.12793   0.06842  -1.870
## EDUCATION   -0.07395   0.16062  -0.460
## group1      1.91781   1.42228   1.348
## month       2.20356   1.17262   1.879
## group1:month 3.61425   1.27001   2.846
##
## Correlation of Fixed Effects:
##      (Intr) AGE  EDUCAT group1 month
## AGE          -0.911
## EDUCATION    -0.462  0.124
## group1       -0.282  0.131 -0.069
## month        0.009  0.004  0.003 -0.056
## group1:mnth -0.007 -0.005 -0.005  0.062 -0.923
## P Value for Full vs. Reduced Model
## [1] 0.004782265

```

NS

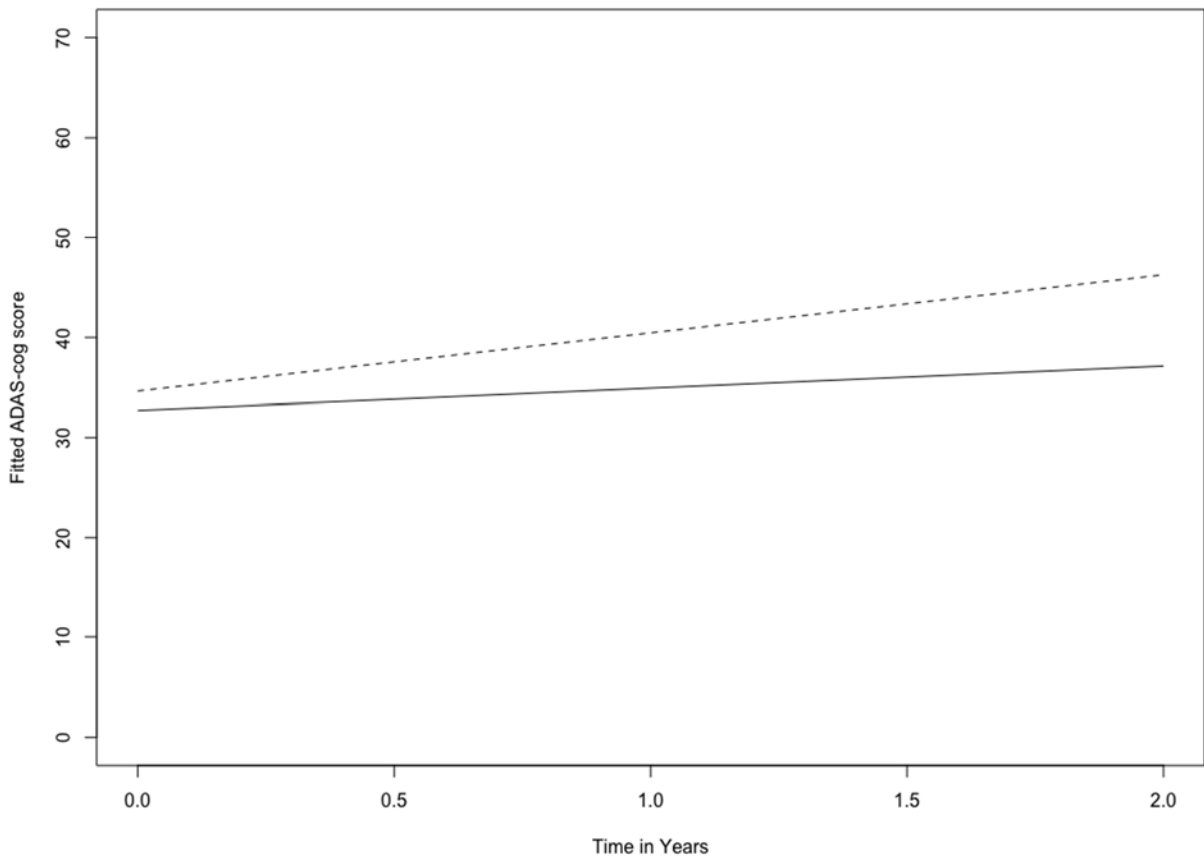

```

## Study Name
## [1] "PR"
## Full Mixed Effects Model
## Linear mixed model fit by maximum likelihood ['lmerMod']
## Formula: ADAS ~ AGE + EDUCATION + group + month + group:month + (month |
##   UID)
## Data: mixed.data
##
##   AIC   BIC logLik deviance df.resid
## 2958.4 2999.2 -1469.2 2938.4   428
##
## Scaled residuals:
##   Min     1Q   Median     3Q      Max
## -2.76980 -0.50680 -0.02234  0.47104  2.93902
##
## Random effects:
## Groups Name      Variance Std.Dev. Corr
## UID   (Intercept) 81.11   9.006
##   month      22.10   4.701   0.76
## Residual      16.67   4.083
## Number of obs: 438, groups: UID, 135
##
## Fixed effects:
##           Estimate Std. Error t value
## (Intercept) 32.78688   9.01135   3.638
## AGE         -0.06482   0.10664  -0.608
## EDUCATION   -0.43416   0.25763  -1.685
## group1      -0.12742   2.39055  -0.053
## month        5.99618   0.63927   9.380
## group1:month -2.16187   1.54065  -1.403
##
## Correlation of Fixed Effects:
##      (Intr) AGE  EDUCAT group1 month
## AGE      -0.911
## EDUCATION -0.521  0.137
## group1   -0.051 -0.008  0.049
## month    0.053 -0.014 -0.026 -0.117
## group1:mnth -0.032  0.014  0.017  0.356 -0.415
## P Value for Full vs. Reduced Model
## [1] 0.1620023

```

PR

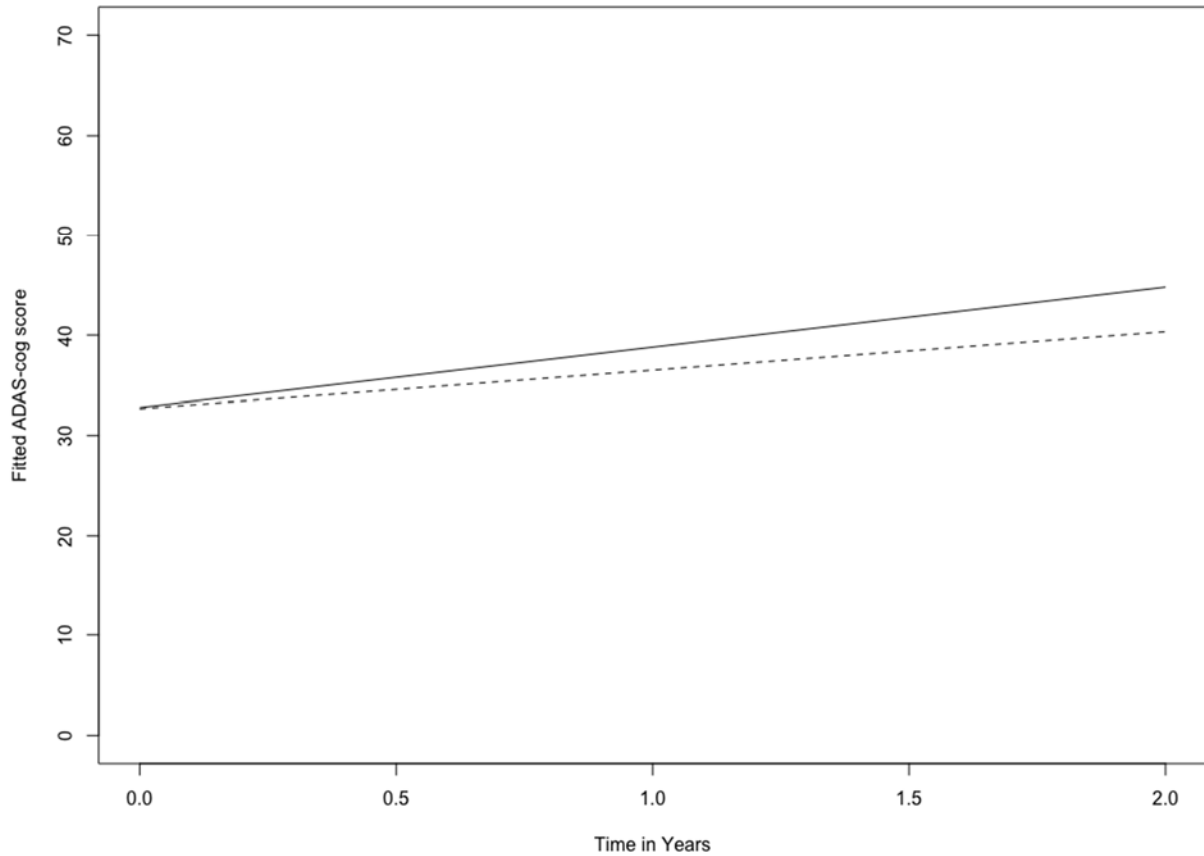

```
## Study Name
## [1] "SL"
## Full Mixed Effects Model
## Linear mixed model fit by maximum likelihood ['lmerMod']
## Formula: ADAS ~ AGE + EDUCATION + group + month + group:month + (month |
##   UID)
## Data: mixed.data
##
##   AIC   BIC logLik deviance df.resid
## 6467.8 6516.5 -3223.9 6447.8    951
##
## Scaled residuals:
##   Min     1Q  Median     3Q      Max
## -2.9713 -0.4627  0.0355  0.4802  3.1977
##
## Random effects:
##   Groups Name   Variance Std.Dev. Corr
##   UID   (Intercept) 105.53  10.273
##   month      14.80   3.847  0.34
## Residual      14.68   3.831
```

```

## Number of obs: 961, groups: UID, 316
##
## Fixed effects:
##      Estimate Std. Error t value
## (Intercept) 51.372173 6.398754 8.028
## AGE        -0.172115 0.076926 -2.237
## EDUCATION   0.006988 0.187404 0.037
## group1     -12.686658 7.818356 -1.623
## month       7.769544 0.356626 21.786
## group1:month 3.711581 3.751239 0.989
##
## Correlation of Fixed Effects:
##      (Intr) AGE  EDUCAT group1 month
## AGE        -0.929
## EDUCATION  -0.488 0.145
## group1     -0.015 0.087 -0.191
## month       0.002 0.001 0.010 -0.007
## group1:mnth 0.001 0.000 -0.003 0.086 -0.095
## P Value for Full vs. Reduced Model
## [1] 0.3234868

```

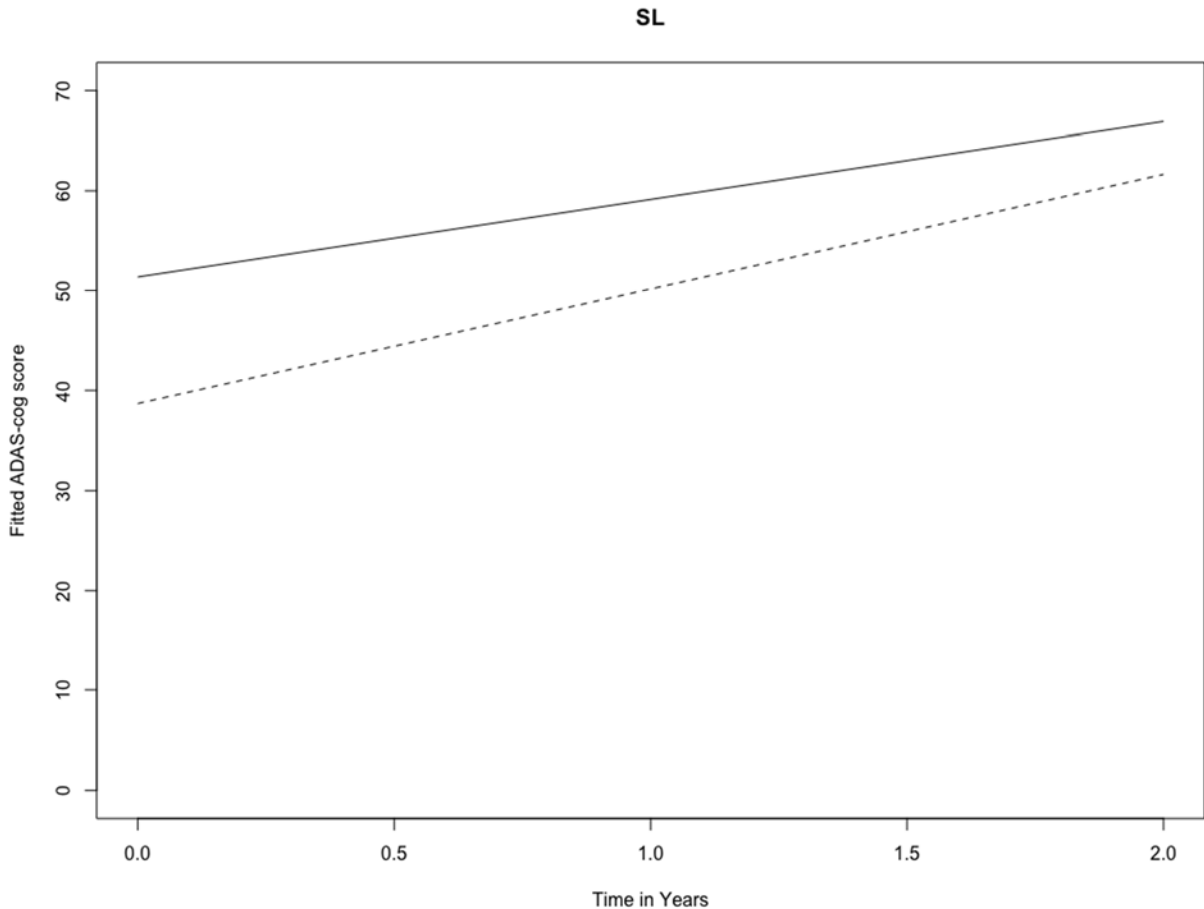

```

## Study Name
## [1] "VN"
## Full Mixed Effects Model
## Linear mixed model fit by maximum likelihood ['lmerMod']
## Formula: ADAS ~ AGE + EDUCATION + group + month + group:month + (month |
##   UID)
## Data: mixed.data
##
##   AIC   BIC logLik deviance df.resid
## 5767.6 5815.3 -2873.8 5747.6   860
##
## Scaled residuals:
##   Min     1Q   Median     3Q      Max
## -3.0375 -0.4897 -0.0031  0.4356  4.0284
##
## Random effects:
## Groups Name      Variance Std.Dev. Corr
## UID   (Intercept) 65.40   8.087
##      month      13.96   3.736   0.31
## Residual      15.89   3.986
## Number of obs: 870, groups: UID, 281
##
## Fixed effects:
##           Estimate Std. Error t value
## (Intercept) 41.58966   7.06175   5.889
## AGE         -0.12357   0.06702  -1.844
## EDUCATION   -0.07391   0.15826  -0.467
## group1      -2.03790   3.63689  -0.560
## month        6.58004   2.45421   2.681
## group1:month -0.44030   2.48236  -0.177
##
## Correlation of Fixed Effects:
##      (Intr) AGE  EDUCAT group1 month
## AGE          -0.793
## EDUCATION    -0.434  0.125
## group1       -0.577  0.072  0.069
## month         0.004 -0.006 -0.003  0.001
## group1:mnth  -0.005  0.006  0.003 -0.001 -0.989
## P Value for Full vs. Reduced Model
## [1] 0.8592453

```

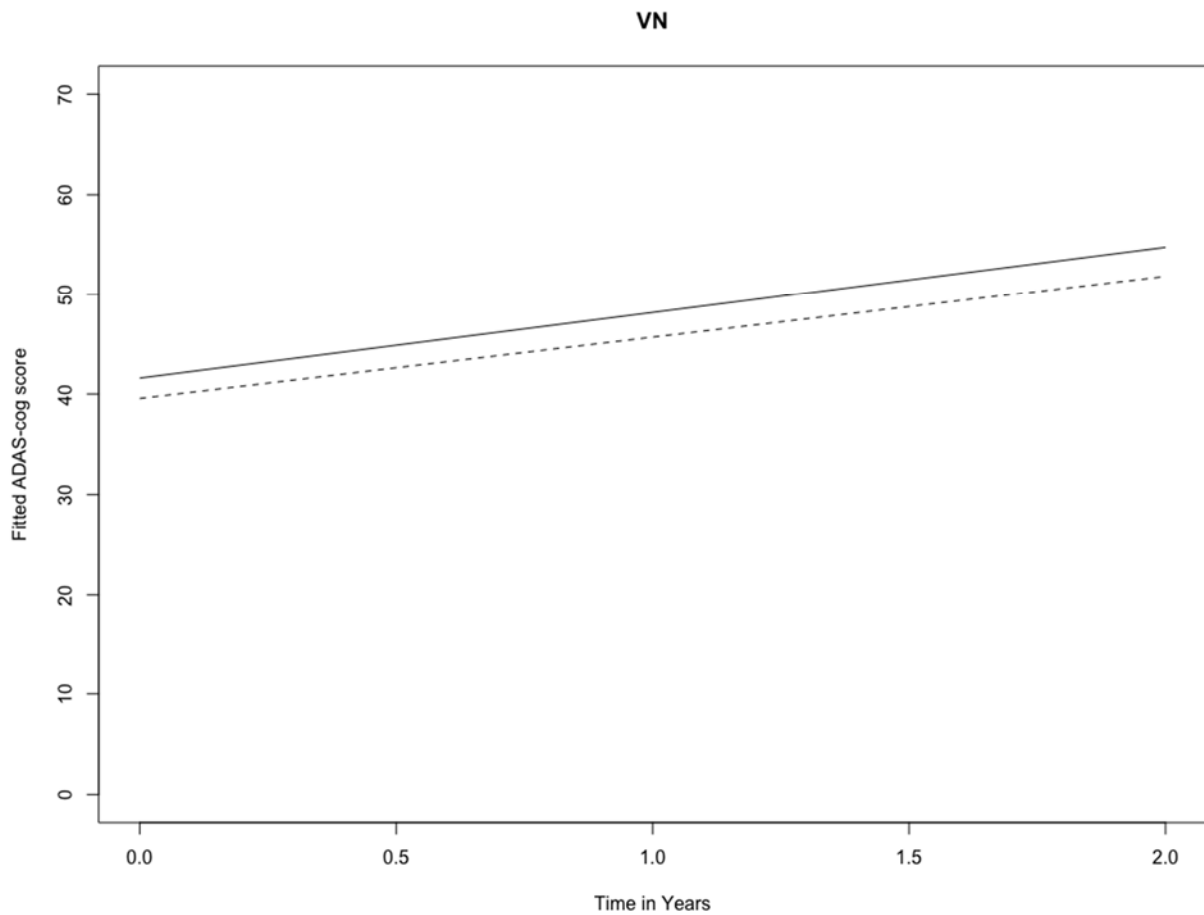

### Meta-Analysis with metafor

```
##
## Random-Effects Model (k = 10; tau^2 estimator: REML)
##
## tau^2 (estimated amount of total heterogeneity): 1.5630 (SE = 1.8553)
## tau (square root of estimated tau^2 value): 1.2502
## I^2 (total heterogeneity / total variability): 40.44%
## H^2 (total variability / sampling variability): 1.68
##
## Test for Heterogeneity:
## Q(df = 9) = 14.1588, p-val = 0.1168
##
## Model Results:
##
## estimate se zval pval ci.lb ci.ub
## 1.4074 0.6466 2.1767 0.0295 0.1401 2.6747 *
##
## ---
## Signif. codes: 0 '***' 0.001 '**' 0.01 '*' 0.05 '.' 0.1 ' ' 1
```



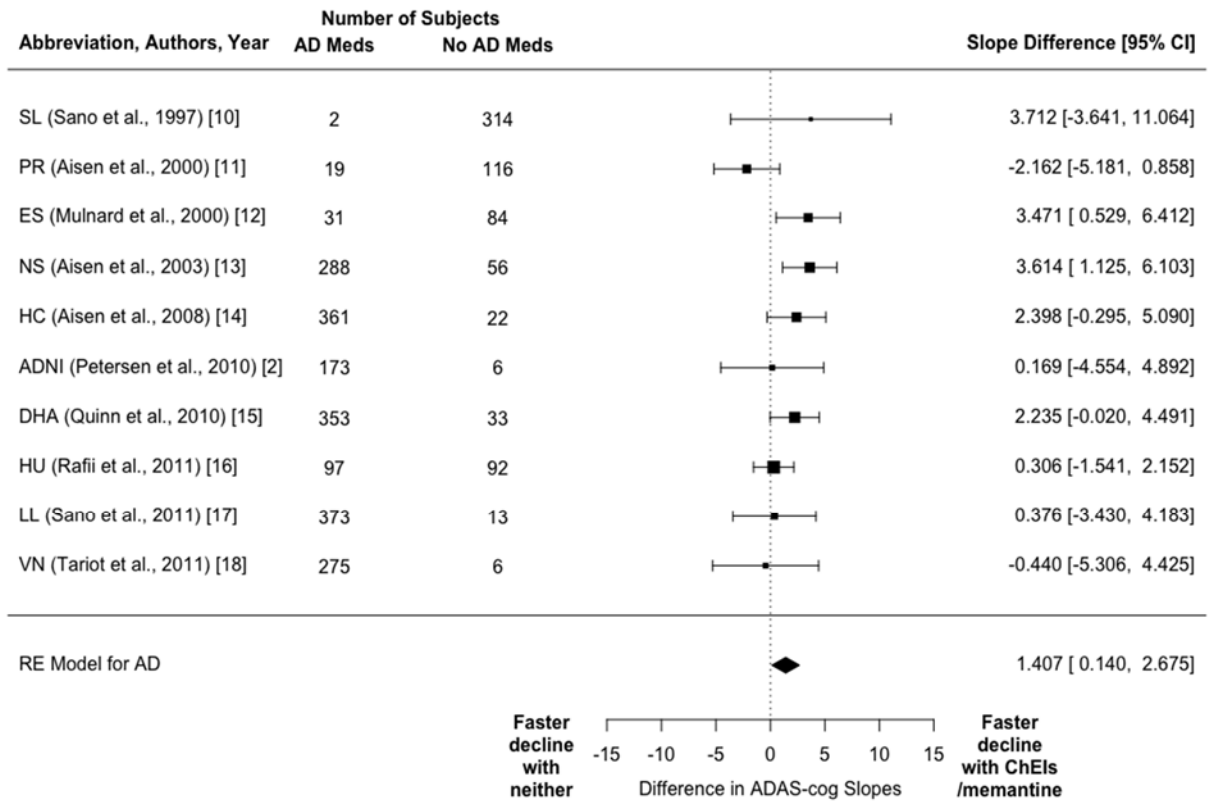

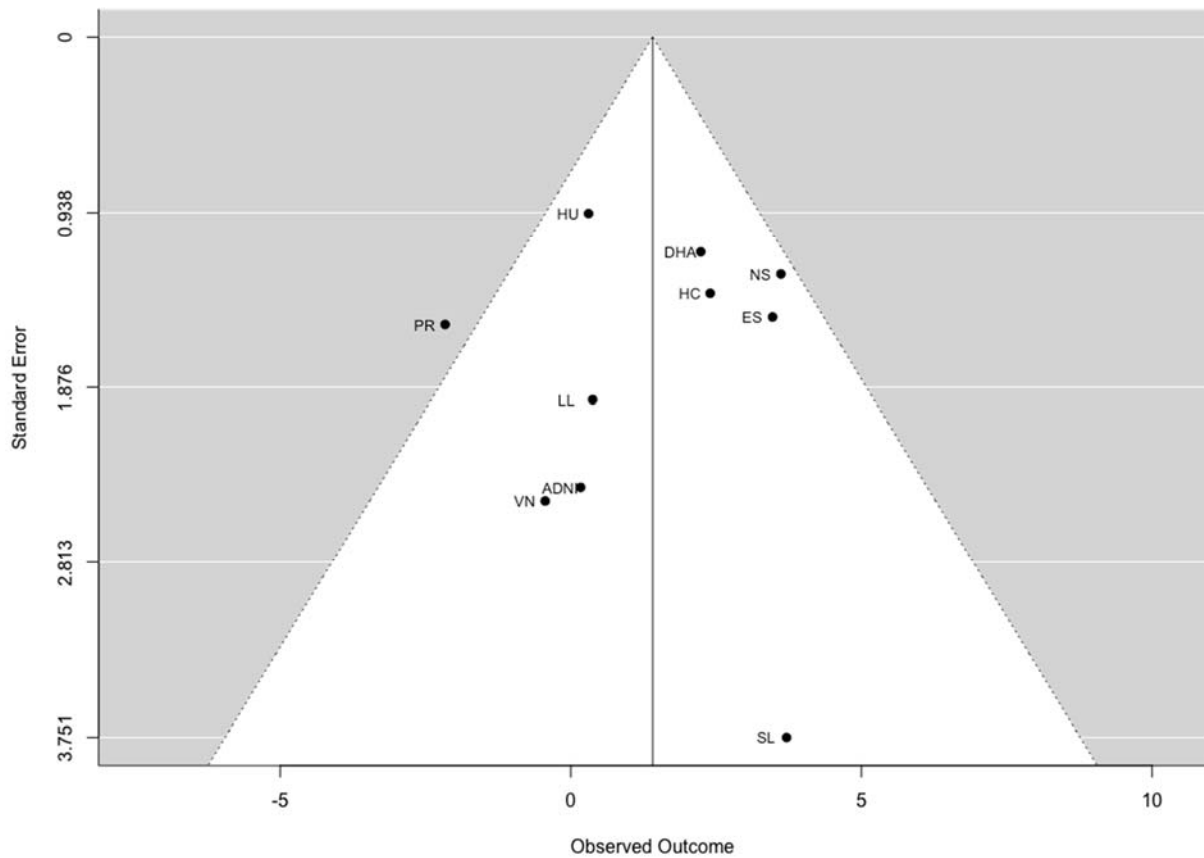

### Fail Safe N

```
##
## Fail-safe N Calculation Using the Rosenberg Approach
##
## Average Effect Size: 1.4219
## Observed Significance Level: 0.0024
## Target Significance Level: 0.05
##
## Fail-safe N: 15
```



## Participant Characteristics

### Baseline Characteristics for All Studies

|                     | Both<br>N=923  | ChEI<br>N=906  | Memantine<br>N=143 | Neither<br>N=742 | P<br>Value | N    |
|---------------------|----------------|----------------|--------------------|------------------|------------|------|
| AGE                 | 74.5<br>(8.78) | 75.5<br>(7.75) | 78.1 (7.24)        | 74.5 (8.16)      | <0.001     | 2714 |
| EDCAT:              |                |                |                    |                  | <0.001     | 2714 |
| Less than HS        | 72<br>(7.80%)  | 126<br>(13.9%) | 20 (14.0%)         | 169<br>(22.8%)   |            |      |
| HS graduate         | 437<br>(47.3%) | 447<br>(49.3%) | 69 (48.3%)         | 383<br>(51.6%)   |            |      |
| College graduate    | 414<br>(44.9%) | 333<br>(36.8%) | 54 (37.8%)         | 190<br>(25.6%)   |            |      |
| RACE: White         | 851<br>(92.2%) | 821<br>(90.6%) | 134 (93.7%)        | 651<br>(87.7%)   | 0.010      | 2714 |
| ETHNIC:<br>Hispanic | 32<br>(3.47%)  | 45<br>(4.97%)  | 9 (6.29%)          | 38<br>(5.12%)    | 0.222      | 2714 |
| SEX: Female         | 478<br>(51.8%) | 529<br>(58.4%) | 94 (65.7%)         | 477<br>(64.3%)   | <0.001     | 2714 |
| MARITAL:<br>Married | 714<br>(77.4%) | 637<br>(70.3%) | 101 (70.6%)        | 505<br>(68.1%)   | <0.001     | 2714 |
| TX: Placebo         | 490<br>(53.1%) | 385<br>(42.5%) | 68 (47.6%)         | 246<br>(33.2%)   | <0.001     | 2714 |
| ADAS_bl             | 25.7<br>(9.54) | 22.5<br>(8.78) | 28.4 (11.0)        | 29.3 (13.2)      | <0.001     | 2714 |
| ADAS_m06            | 27.5<br>(10.2) | 23.7<br>(9.60) | 27.2 (10.4)        | 29.9 (14.3)      | <0.001     | 2240 |
| ADAS_m12            | 29.8<br>(11.3) | 25.0<br>(10.3) | 28.2 (10.8)        | 31.5 (15.4)      | <0.001     | 1944 |
| ADAS_m18            | 31.9<br>(12.1) | 25.6<br>(10.7) | 28.1 (10.4)        | 34.8 (16.4)      | <0.001     | 1182 |
| ADAS_m24            | 32.5<br>(12.2) | 28.3<br>(11.2) | 33.8 (10.0)        | 44.7 (13.1)      | <0.001     | 329  |

### Baseline Characteristics for DHA

|        | Both<br>N=228  | ChEI<br>N=101  | Memantine<br>N=24 | Neither<br>N=33 | P<br>Value | N   |
|--------|----------------|----------------|-------------------|-----------------|------------|-----|
| AGE    | 75.1<br>(8.84) | 76.6<br>(8.24) | 78.5 (5.64)       | 78.4<br>(8.71)  | 0.052      | 386 |
| EDCAT: |                |                |                   |                 | 0.162      | 386 |

|                  |                |                |             |                |        |     |
|------------------|----------------|----------------|-------------|----------------|--------|-----|
| Less than HS     | 14<br>(6.14%)  | 12<br>(11.9%)  | 5 (20.8%)   | 3 (9.09%)      |        |     |
| HS graduate      | 112<br>(49.1%) | 53<br>(52.5%)  | 9 (37.5%)   | 16<br>(48.5%)  |        |     |
| College graduate | 102<br>(44.7%) | 36<br>(35.6%)  | 10 (41.7%)  | 14<br>(42.4%)  |        |     |
| RACE: White      | 211<br>(92.5%) | 92<br>(91.1%)  | 22 (91.7%)  | 28<br>(84.8%)  | 0.471  | 386 |
| ETHNIC: Hispanic | 5 (2.19%)      | 3 (2.97%)      | 2 (8.33%)   | 4 (12.1%)      | 0.022  | 386 |
| SEX: Female      | 122<br>(53.5%) | 56<br>(55.4%)  | 13 (54.2%)  | 12<br>(36.4%)  | 0.271  | 386 |
| MARITAL: Married | 169<br>(74.1%) | 68<br>(67.3%)  | 17 (70.8%)  | 22<br>(66.7%)  | 0.569  | 386 |
| TX: Placebo      | 102<br>(44.7%) | 31<br>(30.7%)  | 12 (50.0%)  | 14<br>(42.4%)  | 0.087  | 386 |
| ADAS_bl          | 25.3<br>(8.76) | 21.2<br>(6.97) | 25.0 (9.81) | 17.8<br>(8.30) | <0.001 | 386 |
| ADAS_m06         | 27.9<br>(9.89) | 22.3<br>(8.24) | 29.1 (9.38) | 18.1<br>(11.4) | <0.001 | 340 |
| ADAS_m12         | 29.6<br>(11.2) | 23.5<br>(9.31) | 28.1 (10.1) | 17.0<br>(12.3) | <0.001 | 300 |
| ADAS_m18         | 31.0<br>(12.0) | 26.8<br>(11.8) | 27.4 (11.6) | 20.4<br>(14.0) | <0.001 | 264 |

### Baseline Characteristics for ES

|                  | ChEI N=31   | Neither N=84 | P Value | N   |
|------------------|-------------|--------------|---------|-----|
| AGE              | 74.3 (7.84) | 75.6 (6.43)  | 0.419   | 115 |
| EDCAT:           |             |              | 0.127   | 115 |
| Less than HS     | 4 (12.9%)   | 26 (31.0%)   |         |     |
| HS graduate      | 21 (67.7%)  | 42 (50.0%)   |         |     |
| College graduate | 6 (19.4%)   | 16 (19.0%)   |         |     |
| RACE: White      | 30 (96.8%)  | 72 (85.7%)   | 0.181   | 115 |
| ETHNIC: Hispanic | 0 (0.00%)   | 4 (4.76%)    | 0.573   | 115 |
| SEX: Female      | 31 (100%)   | 84 (100%)    | .       | 115 |
| MARITAL: Married | 16 (51.6%)  | 36 (42.9%)   | 0.531   | 115 |
| TX: Placebo      | 7 (22.6%)   | 30 (35.7%)   | 0.266   | 115 |
| ADAS_bl          | 24.1 (9.08) | 24.3 (9.22)  | 0.923   | 115 |
| ADAS_m06         | 27.8 (10.1) | 27.1 (9.40)  | 0.756   | 97  |

ADAS\_m12 32.4 (14.2) 27.4 (10.5) 0.118 90

**Baseline Characteristics for HC**

|                     | Both<br>N=186  | ChEI<br>N=171  | Memantine<br>N=4 | Neither<br>N=22 | P<br>Value | N   |
|---------------------|----------------|----------------|------------------|-----------------|------------|-----|
| AGE                 | 75.7<br>(8.01) | 77.4<br>(7.29) | 82.0 (8.91)      | 73.6 (8.42)     | 0.024      | 383 |
| EDCAT:              |                |                |                  |                 | 0.238      | 383 |
| Less than HS        | 17<br>(9.14%)  | 26<br>(15.2%)  | 0 (0.00%)        | 6 (27.3%)       |            |     |
| HS graduate         | 95<br>(51.1%)  | 81<br>(47.4%)  | 2 (50.0%)        | 10<br>(45.5%)   |            |     |
| College graduate    | 74<br>(39.8%)  | 64<br>(37.4%)  | 2 (50.0%)        | 6 (27.3%)       |            |     |
| RACE: White         | 171<br>(91.9%) | 147<br>(86.0%) | 4 (100%)         | 9 (40.9%)       | <0.001     | 383 |
| ETHNIC:<br>Hispanic | 7 (3.76%)      | 14<br>(8.19%)  | 0 (0.00%)        | 0 (0.00%)       | 0.244      | 383 |
| SEX: Female         | 98<br>(52.7%)  | 97<br>(56.7%)  | 3 (75.0%)        | 16<br>(72.7%)   | 0.277      | 383 |
| MARITAL:<br>Married | 141<br>(75.8%) | 106<br>(62.0%) | 3 (75.0%)        | 11<br>(50.0%)   | 0.006      | 383 |
| TX: Placebo         | 78<br>(41.9%)  | 68<br>(39.8%)  | 2 (50.0%)        | 7 (31.8%)       | 0.781      | 383 |
| ADAS_bl             | 24.6<br>(8.93) | 21.0<br>(8.05) | 20.5 (3.16)      | 15.0 (7.73)     | <0.001     | 383 |
| ADAS_m06            | 26.4<br>(9.99) | 21.5<br>(7.61) | 22.3 (2.09)      | 14.6 (8.21)     | <0.001     | 346 |
| ADAS_m12            | 29.2<br>(10.3) | 22.3<br>(8.25) | 24.8 (5.53)      | 17.1 (8.28)     | <0.001     | 324 |
| ADAS_m18            | 31.4<br>(12.3) | 23.6<br>(10.1) | 26.9 (8.47)      | 16.3 (8.41)     | <0.001     | 299 |

**Baseline Characteristics for Study HU**

|              | Both<br>N=7    | ChEI<br>N=2    | Memantine<br>N=88 | Neither<br>N=92 | P<br>Value | N   |
|--------------|----------------|----------------|-------------------|-----------------|------------|-----|
| AGE          | 77.9<br>(6.36) | 78.0<br>(2.83) | 77.8 (7.54)       | 79.0 (8.21)     | 0.762      | 189 |
| EDCAT:       |                |                |                   |                 | 0.310      | 189 |
| Less than HS | 2<br>(28.6%)   | 0<br>(0.00%)   | 11 (12.5%)        | 15 (16.3%)      |            |     |

|                     |                |                |             |             |       |     |
|---------------------|----------------|----------------|-------------|-------------|-------|-----|
| HS graduate         | 3<br>(42.9%)   | 1<br>(50.0%)   | 46 (52.3%)  | 57 (62.0%)  |       |     |
| College graduate    | 2<br>(28.6%)   | 1<br>(50.0%)   | 31 (35.2%)  | 20 (21.7%)  |       |     |
| RACE: White         | 7 (100%)       | 1<br>(50.0%)   | 82 (93.2%)  | 86 (93.5%)  | 0.261 | 189 |
| ETHNIC:<br>Hispanic | 0<br>(0.00%)   | 0<br>(0.00%)   | 5 (5.68%)   | 6 (6.52%)   | 1.000 | 189 |
| SEX: Female         | 3<br>(42.9%)   | 1<br>(50.0%)   | 57 (64.8%)  | 55 (59.8%)  | 0.598 | 189 |
| MARITAL:<br>Married | 7 (100%)       | 1<br>(50.0%)   | 63 (71.6%)  | 62 (67.4%)  | 0.238 | 189 |
| TX: Placebo         | 3<br>(42.9%)   | 0<br>(0.00%)   | 35 (39.8%)  | 28 (30.4%)  | 0.406 | 189 |
| ADAS_bl             | 30.2<br>(7.96) | 23.7<br>(0.00) | 29.9 (11.7) | 23.2 (10.0) | 0.001 | 189 |
| ADAS_m06            | 26.2<br>(7.45) | 24.3<br>(0.94) | 26.2 (11.0) | 20.6 (9.34) | 0.015 | 141 |
| ADAS_m12            | 26.5<br>(4.13) | 22.0 (.)       | 27.8 (11.4) | 21.2 (11.2) | 0.028 | 111 |
| ADAS_m18            | 27.2<br>(2.04) | 30.7 (.)       | 25.9 (8.57) | 21.5 (10.8) | 0.554 | 29  |

### Baseline Characteristics for LL

|                     | Both<br>N=195  | ChEI<br>N=167  | Memantine<br>N=11 | Neither<br>N=13 | P<br>Value | N   |
|---------------------|----------------|----------------|-------------------|-----------------|------------|-----|
| AGE                 | 72.6<br>(9.85) | 75.5<br>(8.31) | 79.8 (8.13)       | 73.2<br>(9.33)  | 0.004      | 386 |
| EDCAT:              |                |                |                   |                 | 0.084      | 386 |
| Less than HS        | 12<br>(6.15%)  | 24<br>(14.4%)  | 1 (9.09%)         | 1 (7.69%)       |            |     |
| HS graduate         | 89<br>(45.6%)  | 83<br>(49.7%)  | 4 (36.4%)         | 6 (46.2%)       |            |     |
| College graduate    | 94<br>(48.2%)  | 60<br>(35.9%)  | 6 (54.5%)         | 6 (46.2%)       |            |     |
| RACE: White         | 179<br>(91.8%) | 153<br>(91.6%) | 10 (90.9%)        | 10<br>(76.9%)   | 0.275      | 386 |
| ETHNIC:<br>Hispanic | 12<br>(6.15%)  | 12<br>(7.19%)  | 0 (0.00%)         | 0 (0.00%)       | 0.966      | 386 |
| SEX: Female         | 104<br>(53.3%) | 108<br>(64.7%) | 10 (90.9%)        | 6 (46.2%)       | 0.014      | 386 |

|                     |                |                |             |                |        |     |
|---------------------|----------------|----------------|-------------|----------------|--------|-----|
| MARITAL:<br>Married | 151<br>(77.4%) | 112<br>(67.1%) | 6 (54.5%)   | 7 (53.8%)      | 0.027  | 386 |
| TX: Placebo         | 94<br>(48.2%)  | 86<br>(51.5%)  | 8 (72.7%)   | 5 (38.5%)      | 0.339  | 386 |
| ADAS_bl             | 26.1<br>(10.5) | 21.6<br>(8.93) | 28.2 (9.81) | 20.8<br>(6.72) | <0.001 | 386 |
| ADAS_m06            | 28.5<br>(10.9) | 21.7<br>(9.55) | 29.4 (11.8) | 22.1<br>(6.73) | <0.001 | 326 |
| ADAS_m12            | 31.0<br>(12.6) | 22.3<br>(8.54) | 34.5 (11.1) | 26.3<br>(10.4) | <0.001 | 293 |
| ADAS_m18            | 31.7<br>(12.8) | 24.9<br>(9.37) | 35.0 (19.6) | 27.7<br>(9.40) | <0.001 | 252 |

### Baseline Characteristics for NS

|                  | Both N=1  | ChEI N=287  | Neither N=56 | P Value | N   |
|------------------|-----------|-------------|--------------|---------|-----|
| AGE              | 55.0 (.)  | 73.5 (7.60) | 76.3 (7.50)  | 0.002   | 344 |
| EDCAT:           |           |             |              | 0.198   | 344 |
| Less than HS     | 0 (0.00%) | 34 (11.8%)  | 12 (21.4%)   |         |     |
| HS graduate      | 0 (0.00%) | 141 (49.1%) | 25 (44.6%)   |         |     |
| College graduate | 1 (100%)  | 112 (39.0%) | 19 (33.9%)   |         |     |
| RACE: White      | 1 (100%)  | 262 (91.3%) | 48 (85.7%)   | 0.290   | 344 |
| ETHNIC: Hispanic | 0 (0.00%) | 13 (4.53%)  | 6 (10.7%)    | 0.150   | 344 |
| SEX: Female      | 1 (100%)  | 148 (51.6%) | 34 (60.7%)   | 0.243   | 344 |
| MARITAL: Married | 0 (0.00%) | 229 (79.8%) | 35 (62.5%)   | 0.003   | 344 |
| TX: Placebo      | 1 (100%)  | 92 (32.1%)  | 17 (30.4%)   | 0.425   | 344 |
| ADAS_bl          | 45.3 (.)  | 24.2 (9.55) | 22.3 (9.64)  | 0.034   | 344 |
| ADAS_m06         | . (.)     | 26.3 (10.8) | 20.8 (11.7)  | 0.005   | 269 |
| ADAS_m12         | . (.)     | 27.6 (10.6) | 21.5 (10.9)  | 0.002   | 231 |

### Baseline Characteristics for PR

|                  | ChEI N=19   | Neither N=116 | P Value | N   |
|------------------|-------------|---------------|---------|-----|
| AGE              | 72.6 (5.13) | 72.3 (7.94)   | 0.838   | 135 |
| EDCAT:           |             |               | 0.510   | 135 |
| Less than HS     | 1 (5.26%)   | 14 (12.1%)    |         |     |
| HS graduate      | 13 (68.4%)  | 61 (52.6%)    |         |     |
| College graduate | 5 (26.3%)   | 41 (35.3%)    |         |     |
| RACE: White      | 19 (100%)   | 110 (94.8%)   | 0.594   | 135 |
| ETHNIC: Hispanic | 0 (0.00%)   | 5 (4.31%)     | 1.000   | 135 |



|                  |             |             |       |     |
|------------------|-------------|-------------|-------|-----|
| SEX: Female      | 12 (63.2%)  | 56 (48.3%)  | 0.339 | 135 |
| MARITAL: Married | 16 (84.2%)  | 97 (83.6%)  | 1.000 | 135 |
| TX: Placebo      | 9 (47.4%)   | 58 (50.0%)  | 1.000 | 135 |
| ADAS_bl          | 21.3 (8.05) | 21.9 (10.2) | 0.756 | 135 |
| ADAS_m06         | 24.1 (11.2) | 24.1 (11.6) | 0.994 | 117 |
| ADAS_m12         | 27.1 (12.9) | 27.6 (12.9) | 0.872 | 99  |
| ADAS_m18         | 25.6 (12.6) | 27.7 (13.7) | 0.540 | 87  |

#### Baseline Characteristics for SL

|                  | ChEI N=2    | Neither N=314 | P Value | N   |
|------------------|-------------|---------------|---------|-----|
| AGE              | 61.0 (0.00) | 73.0 (8.01)   | <0.001  | 316 |
| EDCAT:           |             |               | 0.042   | 316 |
| Less than HS     | 0 (0.00%)   | 90 (28.7%)    |         |     |
| HS graduate      | 0 (0.00%)   | 161 (51.3%)   |         |     |
| College graduate | 2 (100%)    | 63 (20.1%)    |         |     |
| RACE: White      | 1 (50.0%)   | 277 (88.2%)   | 0.226   | 316 |
| ETHNIC: Hispanic | 1 (50.0%)   | 12 (3.82%)    | 0.081   | 316 |
| SEX: Female      | 1 (50.0%)   | 205 (65.3%)   | 1.000   | 316 |
| MARITAL: Married | 2 (100%)    | 228 (72.6%)   | 1.000   | 316 |
| TX: Placebo      | 1 (50.0%)   | 77 (24.5%)    | 0.433   | 316 |
| ADAS_bl          | 28.8 (3.06) | 39.1 (10.8)   | 0.111   | 316 |
| ADAS_m06         | 29.5 (1.18) | 40.4 (12.0)   | 0.001   | 238 |
| ADAS_m12         | 44.0 (3.30) | 43.5 (12.5)   | 0.862   | 180 |
| ADAS_m18         | 50.0 (.)    | 44.6 (12.8)   | .       | 129 |
| ADAS_m24         | 41.0 (.)    | 45.5 (12.9)   | .       | 98  |

#### Baseline Characteristics for VN

|                     | Both<br>N=197  | ChEI<br>N=67   | Memantine<br>N=11 | Neither<br>N=6 | P<br>Value | N   |
|---------------------|----------------|----------------|-------------------|----------------|------------|-----|
| AGE                 | 74.8<br>(8.36) | 77.9<br>(6.55) | 76.2 (5.98)       | 79.2<br>(5.78) | 0.026      | 281 |
| EDCAT:              |                |                |                   |                | 0.251      | 281 |
| Less than HS        | 22<br>(11.2%)  | 16<br>(23.9%)  | 1 (9.09%)         | 0 (0.00%)      |            |     |
| HS graduate         | 95<br>(48.2%)  | 30<br>(44.8%)  | 6 (54.5%)         | 3 (50.0%)      |            |     |
| College<br>graduate | 80<br>(40.6%)  | 21<br>(31.3%)  | 4 (36.4%)         | 3 (50.0%)      |            |     |

|                     |                |                |             |                |       |     |
|---------------------|----------------|----------------|-------------|----------------|-------|-----|
| RACE: White         | 180<br>(91.4%) | 60<br>(89.6%)  | 11 (100%)   | 6 (100%)       | 0.798 | 281 |
| ETHNIC:<br>Hispanic | 6 (3.05%)      | 2 (2.99%)      | 2 (18.2%)   | 0 (0.00%)      | 0.137 | 281 |
| SEX: Female         | 108<br>(54.8%) | 44<br>(65.7%)  | 6 (54.5%)   | 4 (66.7%)      | 0.439 | 281 |
| MARITAL:<br>Married | 148<br>(75.1%) | 42<br>(62.7%)  | 10 (90.9%)  | 5 (83.3%)      | 0.114 | 281 |
| TX: Placebo         | 103<br>(52.3%) | 32<br>(47.8%)  | 6 (54.5%)   | 4 (66.7%)      | 0.823 | 281 |
| ADAS_bl             | 30.1<br>(9.18) | 26.4<br>(8.62) | 30.8 (8.05) | 30.6<br>(9.48) | 0.030 | 281 |
| ADAS_m06            | 31.9<br>(9.13) | 27.8<br>(8.62) | 33.3 (7.46) | 30.5<br>(4.76) | 0.042 | 197 |
| ADAS_m12            | 35.0<br>(10.2) | 30.0<br>(11.7) | 33.5 (10.4) | 34.1<br>(1.85) | 0.087 | 166 |
| ADAS_m18            | 35.3<br>(10.5) | 32.3<br>(9.96) | 31.2 (3.57) | 40.2<br>(2.59) | 0.300 | 122 |
| ADAS_m24            | 36.8<br>(10.7) | 30.2<br>(10.6) | 38.0 (8.82) | 35.2<br>(9.67) | 0.048 | 104 |

#### Baseline Characteristics for ADNI

|                     | Both<br>N=109  | ChEI<br>N=59   | Memantine<br>N=5 | Neither<br>N=6 | P<br>Value | N   |
|---------------------|----------------|----------------|------------------|----------------|------------|-----|
| AGE                 | 74.1<br>(8.15) | 76.9<br>(6.23) | 78.0 (9.43)      | 77.3<br>(5.09) | 0.080      | 179 |
| EDCAT:              |                |                |                  |                | 0.015      | 179 |
| Less than HS        | 5 (4.59%)      | 9 (15.3%)      | 2 (40.0%)        | 2 (33.3%)      |            |     |
| HS graduate         | 43<br>(39.4%)  | 24<br>(40.7%)  | 2 (40.0%)        | 2 (33.3%)      |            |     |
| College graduate    | 61<br>(56.0%)  | 26<br>(44.1%)  | 1 (20.0%)        | 2 (33.3%)      |            |     |
| RACE: White         | 102<br>(93.6%) | 56<br>(94.9%)  | 5 (100%)         | 5 (83.3%)      | 0.608      | 179 |
| ETHNIC:<br>Hispanic | 2 (1.83%)      | 0 (0.00%)      | 0 (0.00%)        | 1 (16.7%)      | 0.168      | 179 |
| SEX: Female         | 42<br>(38.5%)  | 31<br>(52.5%)  | 5 (100%)         | 5 (83.3%)      | 0.003      | 179 |
| MARITAL:<br>Married | 98<br>(89.9%)  | 45<br>(76.3%)  | 2 (40.0%)        | 2 (33.3%)      | <0.001     | 179 |

|             |                |                |             |                |       |     |
|-------------|----------------|----------------|-------------|----------------|-------|-----|
| TX: Placebo | 109<br>(100%)  | 59<br>(100%)   | 5 (100%)    | 6 (100%)       | .     | 179 |
| ADAS_bl     | 19.2<br>(6.29) | 17.8<br>(5.85) | 20.7 (9.29) | 17.9<br>(9.95) | 0.499 | 179 |
| ADAS_m06    | 21.5<br>(7.89) | 19.7<br>(7.30) | 20.7 (7.94) | 20.2<br>(12.6) | 0.607 | 169 |
| ADAS_m12    | 23.0<br>(8.98) | 21.7<br>(8.74) | 21.2 (7.11) | 23.2<br>(15.2) | 0.856 | 150 |
| ADAS_m24    | 28.9<br>(12.3) | 26.7<br>(11.5) | 26.5 (8.17) | 30.2<br>(13.2) | 0.795 | 127 |



## Percent taking ChEIs by year

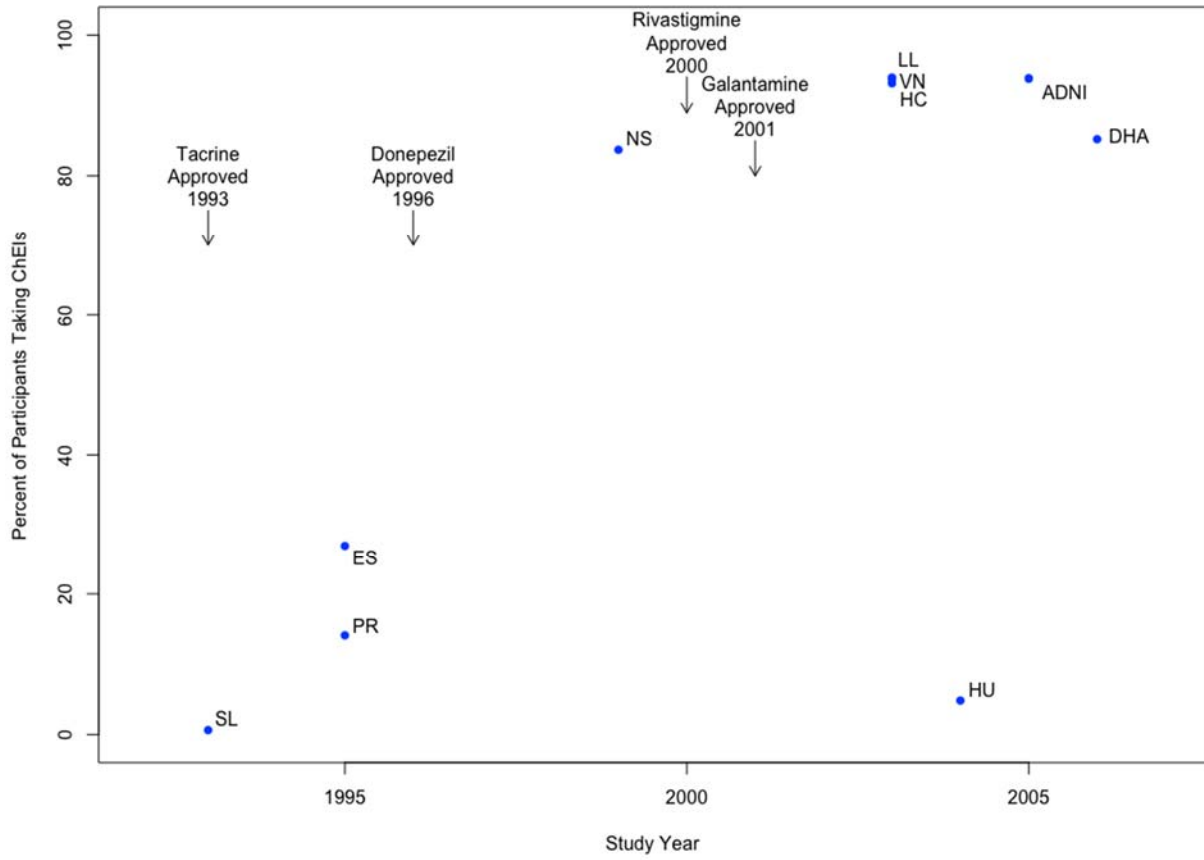



### Percent taking each ChEI

```
## [1] 1829

##      [,1]
## donepezil 1428
## galantamine 308
## rivastigmine 183
## metrifonate 1
## tacrine 1

##      [,1]
## donepezil 78.07545107
## galantamine 16.83980317
## rivastigmine 10.00546747
## metrifonate 0.05467469
## tacrine 0.05467469

## each.chEI.count
## 1 2 3
## 1742 82 5

## each.chEI.count
## 1 2 3
## 0.952433024 0.044833242 0.002733734
```

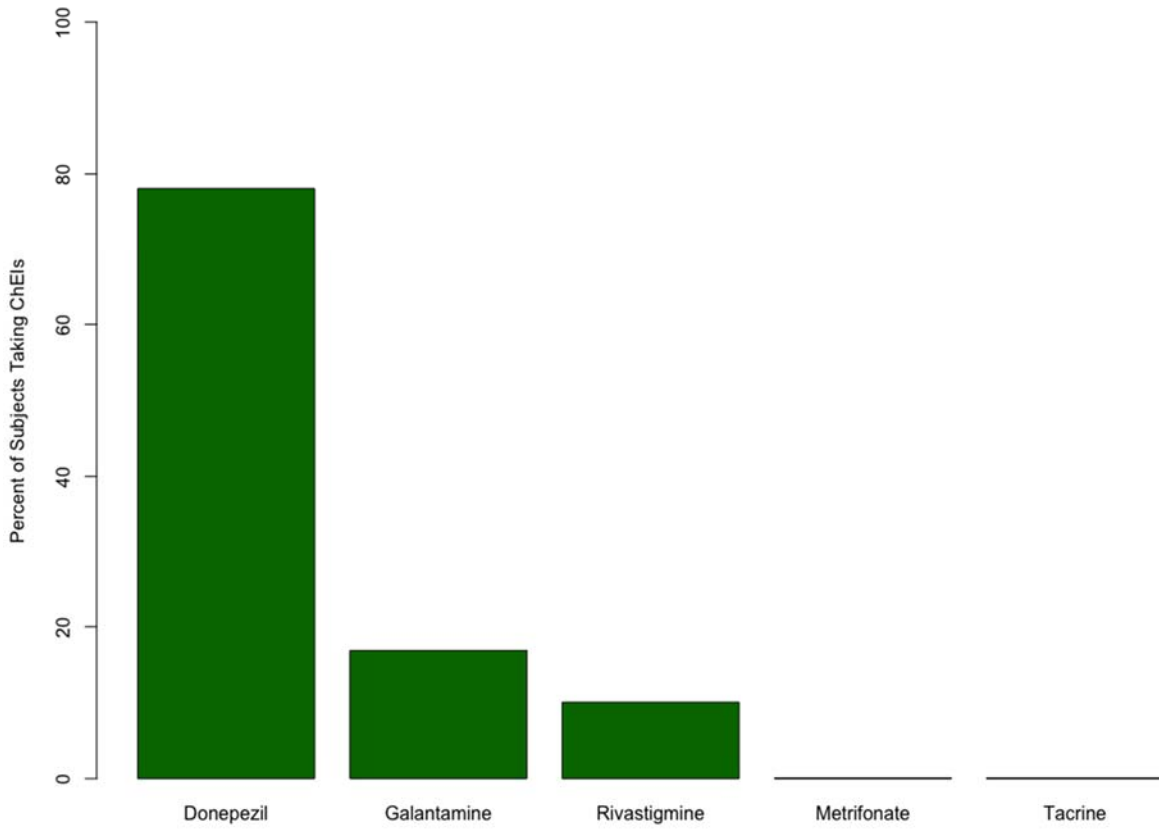





## Percent taking memantine by year

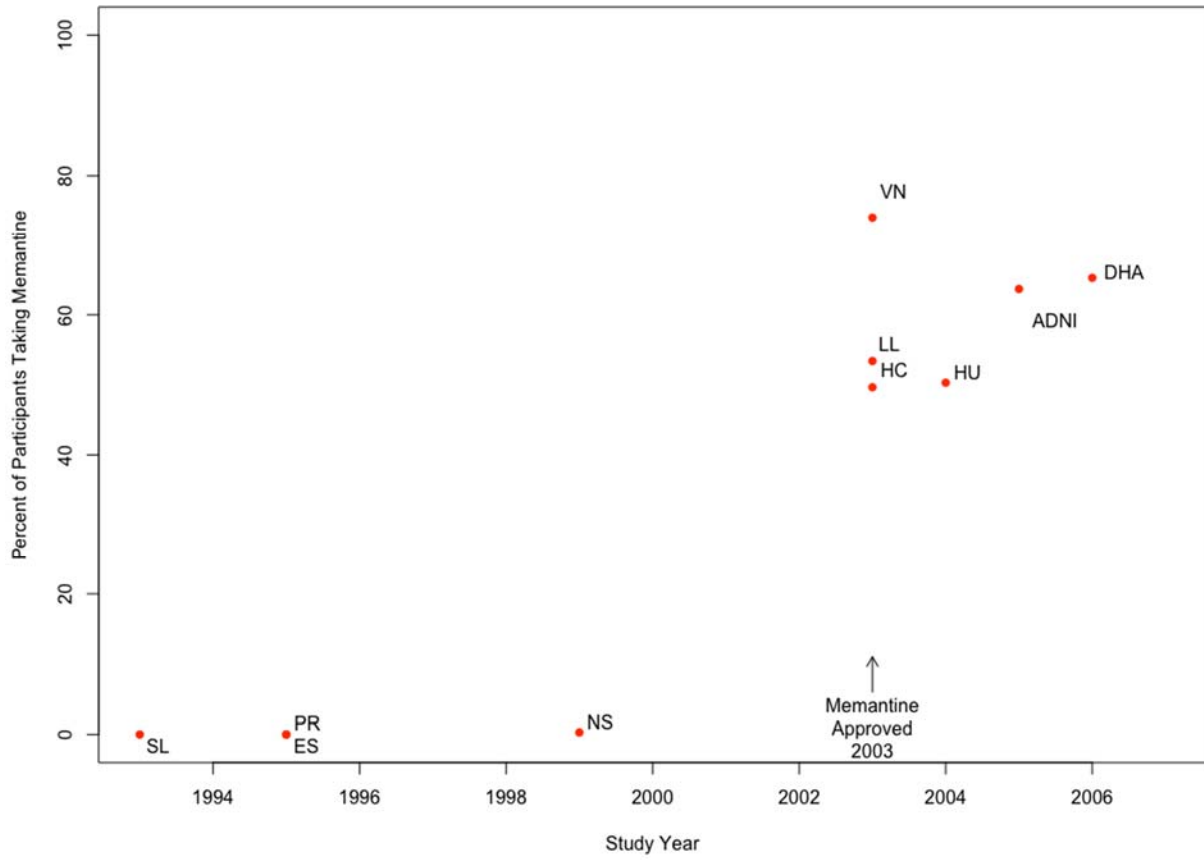

### Percent taking ChEIs and memantine by year

```
##
## Both ChEI Memantine Neither
## 923 906 143 742
##
## Both ChEI Memantine Neither
## 34.008843 33.382461 5.268976 27.339720
```

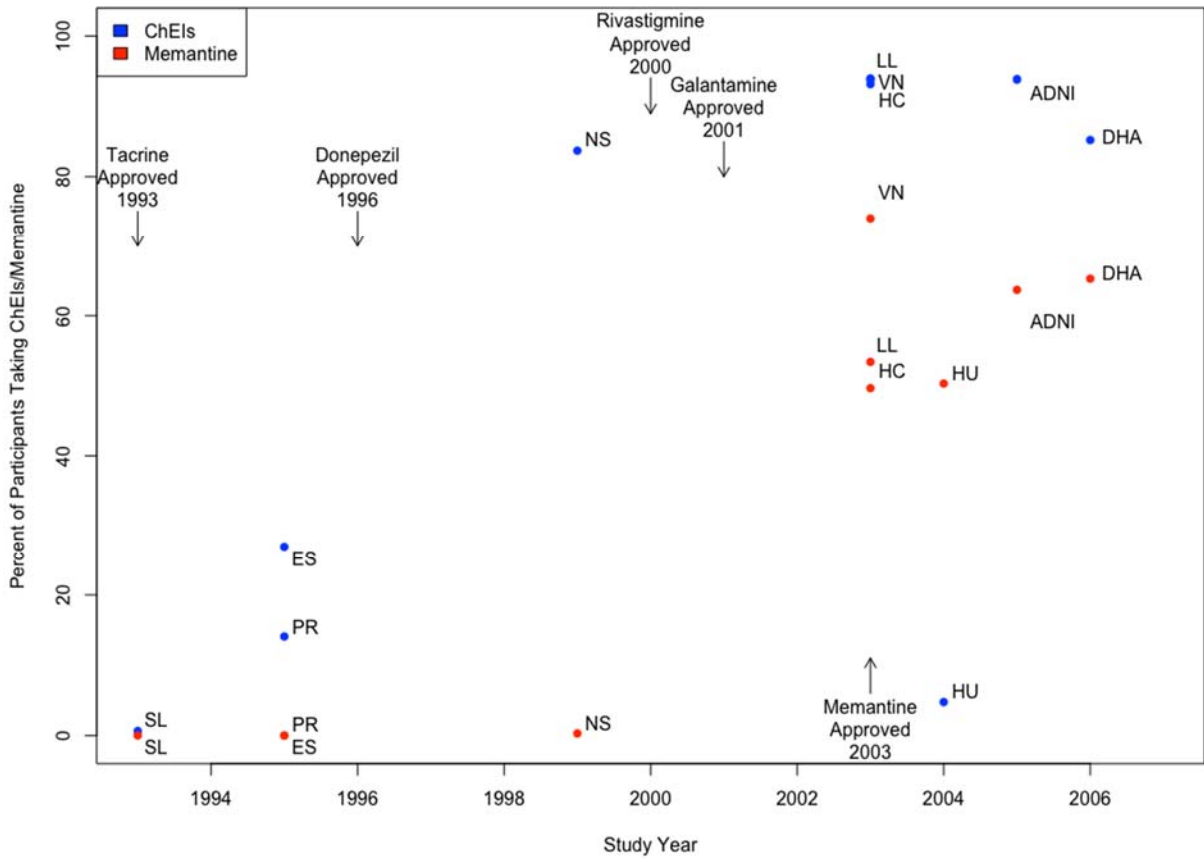

## Rates of decline across studies (excluding ADNI)

### Meta-Analysis

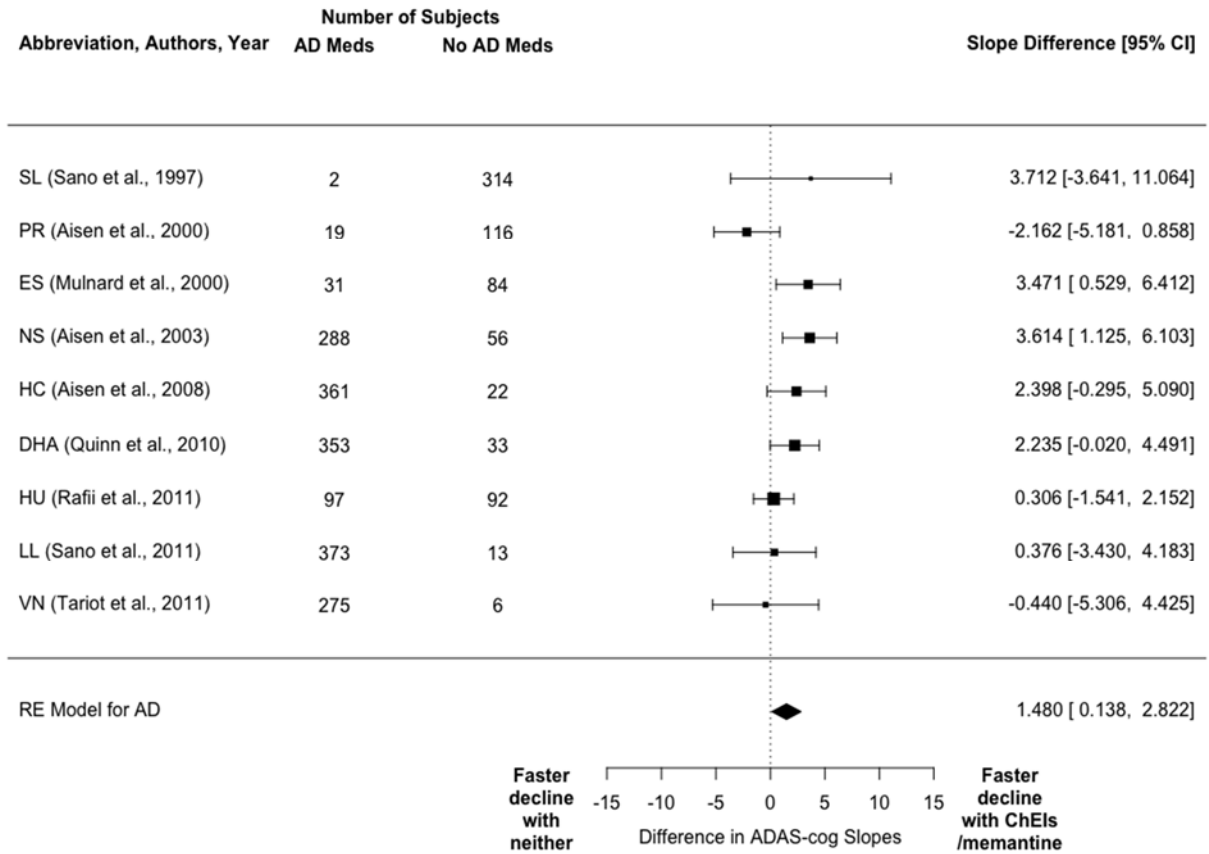

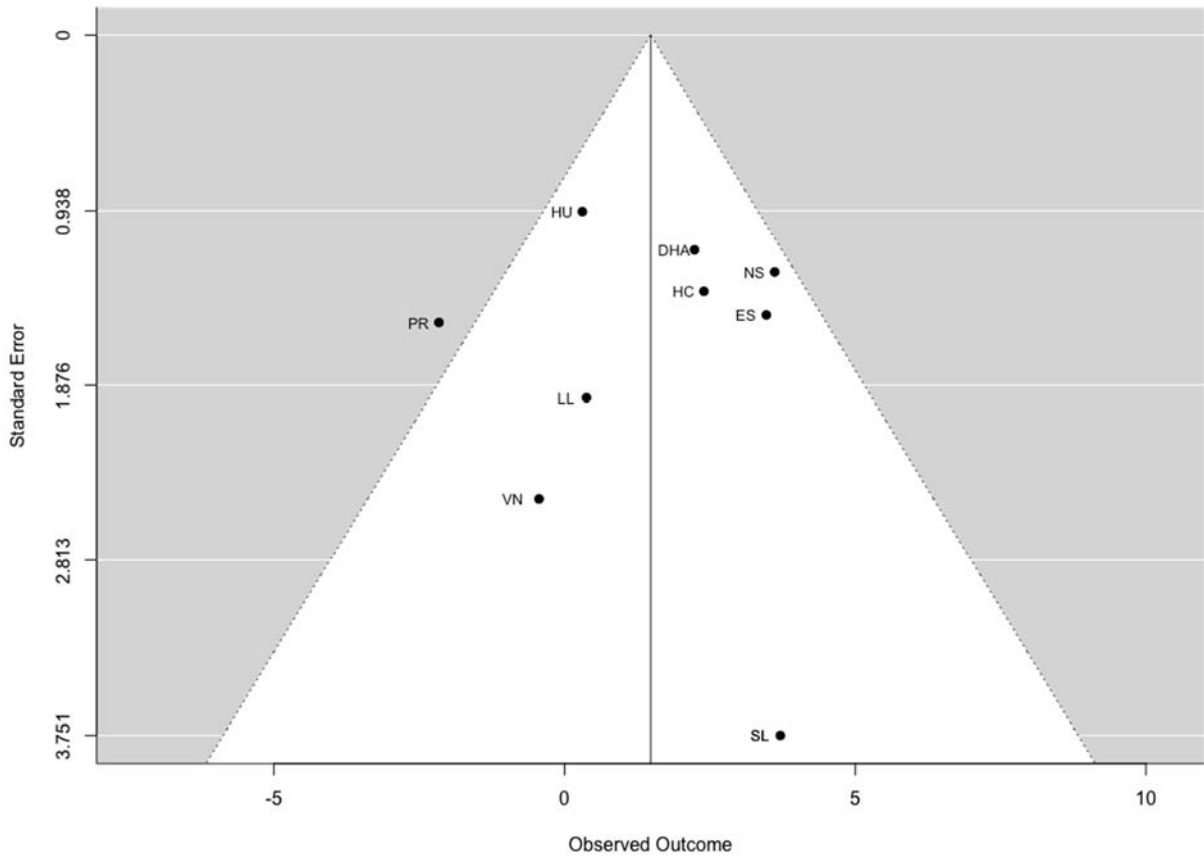

## Rates of decline across studies (presented as effect sizes)

### Mixed Effects Models

```
## Study Name
## [1] "ADNI"
## Effect Sizes
##           t    df    d
## AGE      0.88560642 171.0664 0.13542175
## EDUCATION 0.36548967 170.1638 0.05603656
## group1   0.26061972 175.8092 0.03931122
## month    2.04172270 139.8705 0.34527386
## group1:month 0.06693093 140.0256 0.01131236
## Study Name
## [1] "DHA"
## Effect Sizes
##           t    df    d
## AGE      2.890042 359.0926 0.3050218
## EDUCATION -1.273045 366.5684 -0.1329831
## group1   4.556713 377.4969 0.4690563
## month    2.895999 294.0238 0.3377826
## group1:month 1.937505 295.3313 0.2254852
## Study Name
## [1] "ES"
## Effect Sizes
##           t    df    d
## AGE      1.19443908 109.04326 0.22876763
## EDUCATION -0.43378813 105.68020 -0.08439386
## group1   -0.06235949 110.79660 -0.01184866
## month    6.11482550  94.51447 1.25795443
## group1:month 2.28943805 93.03537 0.47471706
## Study Name
## [1] "HC"
## Effect Sizes
##           t    df    d
## AGE      3.079921 369.9991 0.3202353
## EDUCATION -3.136811 369.6668 -0.3262970
## group1   4.080417 377.5313 0.4200085
## month    1.542196 331.1162 0.1695037
## group1:month 1.740498 330.5958 0.1914498
## Study Name
## [1] "HU"
## Effect Sizes
##           t    df    d
## AGE     -0.4027470 183.4344 -0.05947328
## EDUCATION -1.5101059 183.1461 -0.22317143
## group1   4.3159069 183.4569 0.63728703
## month    2.1794527 209.2660 0.30132011
```

```

## group1:month 0.3237497 200.4569 0.04573292
## Study Name
## [1] "LL"
## Effect Sizes
##          t    df      d
## AGE      -0.1267571 380.0840 -0.01300356
## EDUCATION 0.4921702 373.3606 0.05094259
## group1    1.3173025 382.9875 0.13462422
## month     2.6260264 264.5239 0.32292124
## group1:month 0.1944765 264.5884 0.02391176
## Study Name
## [1] "NS"
## Effect Sizes
##          t    df      d
## AGE      -1.8590646 336.2817 -0.20275560
## EDUCATION -0.4575322 336.5388 -0.04988088
## group1    1.3404055 339.0903 0.14558228
## month     1.8718855 233.7528 0.24486734
## group1:month 2.8346195 235.0970 0.36974404
## Study Name
## [1] "PR"
## Effect Sizes
##          t    df      d
## AGE      -0.59784614 127.01989 -0.106092227
## EDUCATION -1.65410896 122.24971 -0.299205920
## group1    -0.05281457 127.73206 -0.009346172
## month     9.29378230 104.74108 1.816201245
## group1:month -1.38875250 92.53538 -0.288736008
## Study Name
## [1] "SL"
## Effect Sizes
##          t    df      d
## AGE      -2.22468100 309.9802 -0.252714862
## EDUCATION 0.03760996 310.7230 0.004267231
## group1    -1.61347700 304.6155 -0.184891437
## month    21.67285055 187.9064 3.162097829
## group1:month 0.98908684 185.4270 0.145270687
## Study Name
## [1] "VN"
## Effect Sizes
##          t    df      d
## AGE      -1.8327867 273.5500 -0.22162745
## EDUCATION -0.4616327 271.3396 -0.05604927
## group1    -0.5559867 269.3575 -0.06775321
## month     2.6688896 161.1334 0.42050173
## group1:month -0.1792771 160.8840 -0.02826821

```

## Meta-Analysis with metafor

```

##
## Random-Effects Model (k = 10; tau^2 estimator: REML)
##
## tau^2 (estimated amount of total heterogeneity): 0.0078 (SE = 0.0248)
## tau (square root of estimated tau^2 value): 0.0883
## I^2 (total heterogeneity / total variability): 13.27%
## H^2 (total variability / sampling variability): 1.15
##
## Test for Heterogeneity:
## Q(df = 9) = 8.6382, p-val = 0.4713
##
## Model Results:
##
## estimate se zval pval ci.lb ci.ub
## 0.1673 0.0771 2.1705 0.0300 0.0162 0.3184 *
##
## ---
## Signif. codes: 0 '***' 0.001 '**' 0.01 '*' 0.05 '.' 0.1 ' ' 1

```

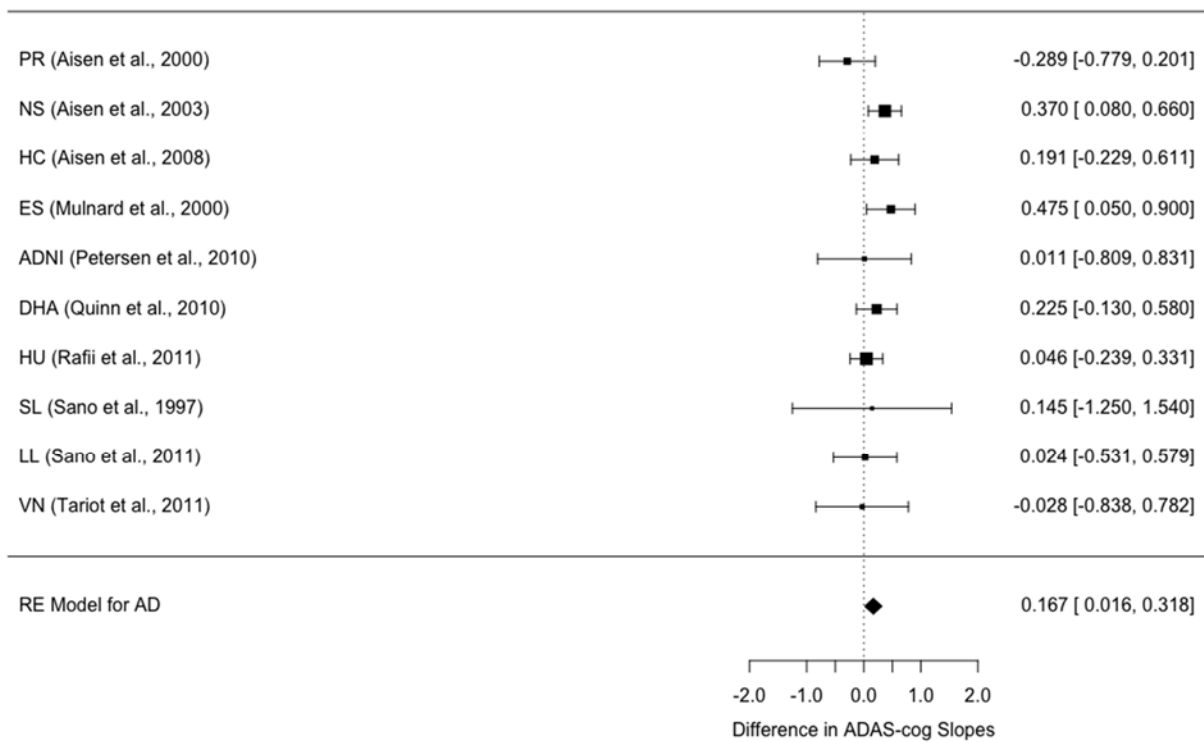



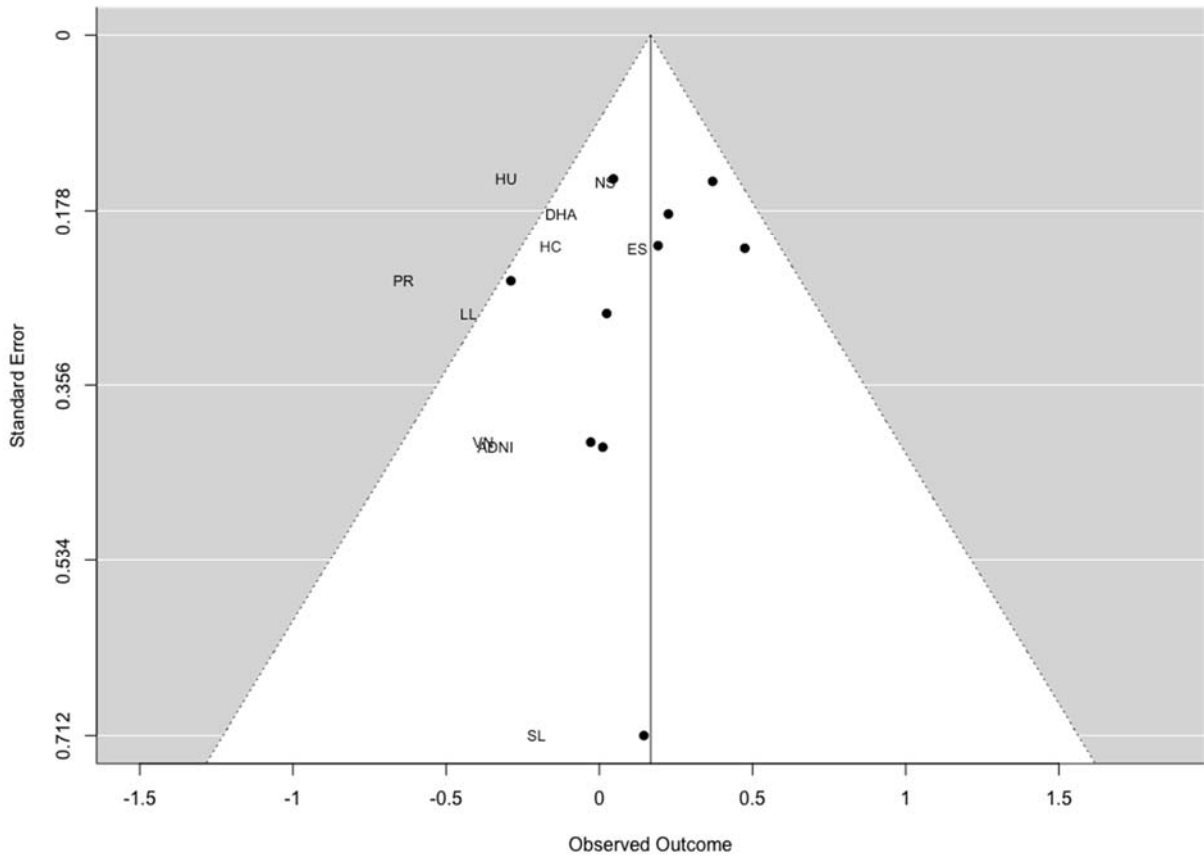

## Rates of decline for ChEIs vs. neither

### Mixed Models

```
## Study Name
## [1] "ADNI"
## Full Mixed Effects Model
## Linear mixed model fit by maximum likelihood ['lmerMod']
## Formula: ADAS ~ AGE + EDUCATION + group + month + group:month + (month |
##   UID)
## Data: mixed.data
##
##   AIC   BIC logLik deviance df.resid
## 1355.7 1389.5 -667.8 1335.7   207
##
## Scaled residuals:
##   Min     1Q  Median     3Q      Max
## -2.23216 -0.39292 -0.02574  0.36394  2.53793
##
## Random effects:
## Groups Name      Variance Std.Dev. Corr
## UID   (Intercept) 30.229   5.498
##      month      14.023   3.745   0.49
## Residual          9.804   3.131
## Number of obs: 217, groups: UID, 65
##
## Fixed effects:
##           Estimate Std. Error t value
## (Intercept) 11.77585  10.17250  1.158
## AGE         0.05206   0.12220  0.426
## EDUCATION   0.16585   0.21942  0.756
## group1     -0.41759   2.63963 -0.158
## month       4.96049   2.07887  2.386
## group1:month -0.26826   2.17385 -0.123
##
## Correlation of Fixed Effects:
##      (Intr) AGE  EDUCAT group1 month
## AGE          -0.933
## EDUCATION    -0.276  0.015
## group1       -0.204  0.017 -0.158
## month        0.016  0.013  0.063 -0.182
## group1:mnth -0.020 -0.008 -0.061  0.190 -0.956
## P Value for Full vs. Reduced Model
## [1] 0.9019588
```

### ADNI

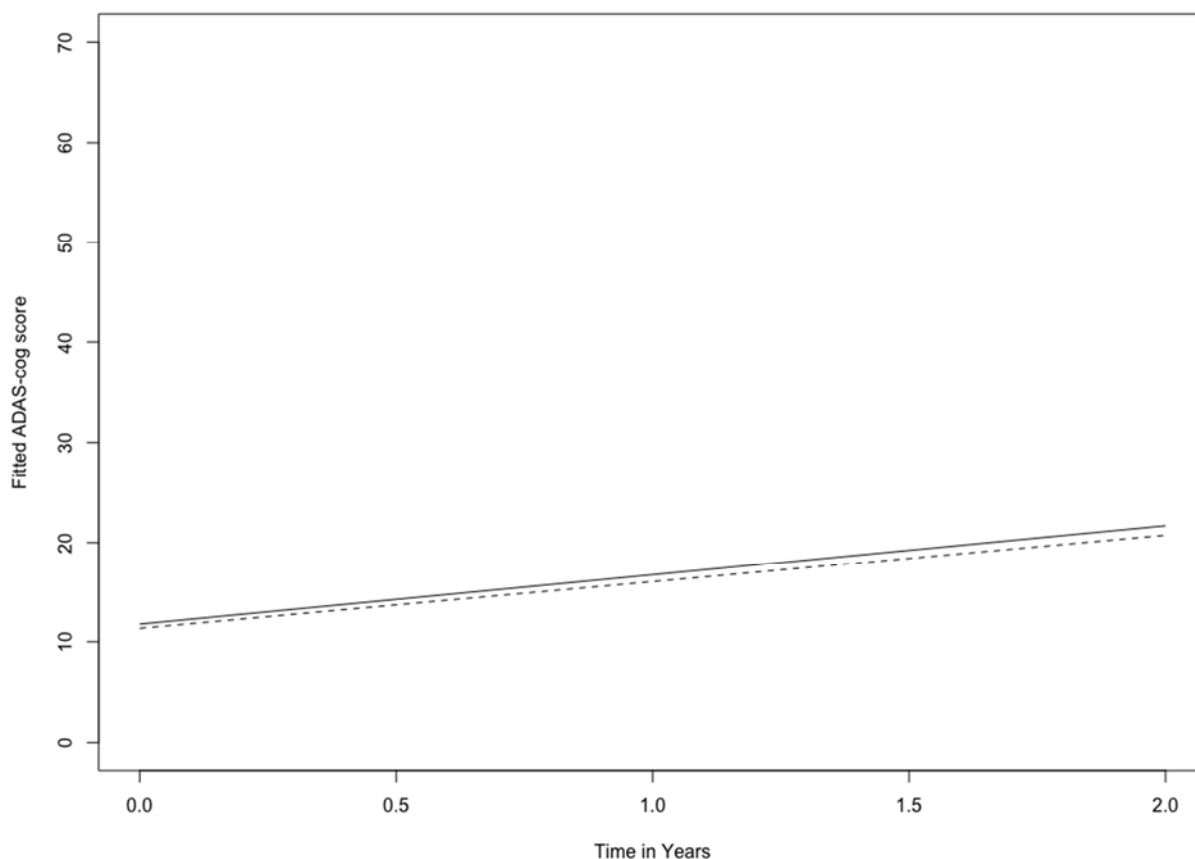

```
## Study Name
## [1] "DHA"
## Full Mixed Effects Model
## Linear mixed model fit by maximum likelihood ['lmerMod']
## Formula: ADAS ~ AGE + EDUCATION + group + month + group:month + (month |
##   UID)
## Data: mixed.data
##
##   AIC   BIC logLik deviance df.resid
## 2872.3 2913.5 -1426.1 2852.3   445
##
## Scaled residuals:
##   Min     1Q  Median     3Q    Max
## -2.47423 -0.47238 -0.05433  0.44697  2.82137
##
## Random effects:
## Groups Name      Variance Std.Dev. Corr
## UID   (Intercept) 39.49   6.284
##      month      20.82   4.563  0.64
## Residual          11.14   3.338
```

```

## Number of obs: 455, groups: UID, 134
##
## Fixed effects:
##      Estimate Std. Error t value
## (Intercept) 5.91901  6.30850  0.938
## AGE         0.23081  0.06911  3.340
## EDUCATION  -0.46288  0.20682 -2.238
## group1      3.58044  1.39511  2.566
## month       3.20186  1.06703  3.001
## group1:month 0.76304  1.22349  0.624
##
## Correlation of Fixed Effects:
##      (Intr) AGE  EDUCAT group1 month
## AGE      -0.862
## EDUCATION -0.476  0.008
## group1   -0.268  0.089  0.057
## month     0.055 -0.009  0.008 -0.230
## group1:mnth -0.040 -0.001 -0.006  0.264 -0.872
## P Value for Full vs. Reduced Model
## [1] 0.5351913

```

**DHA**

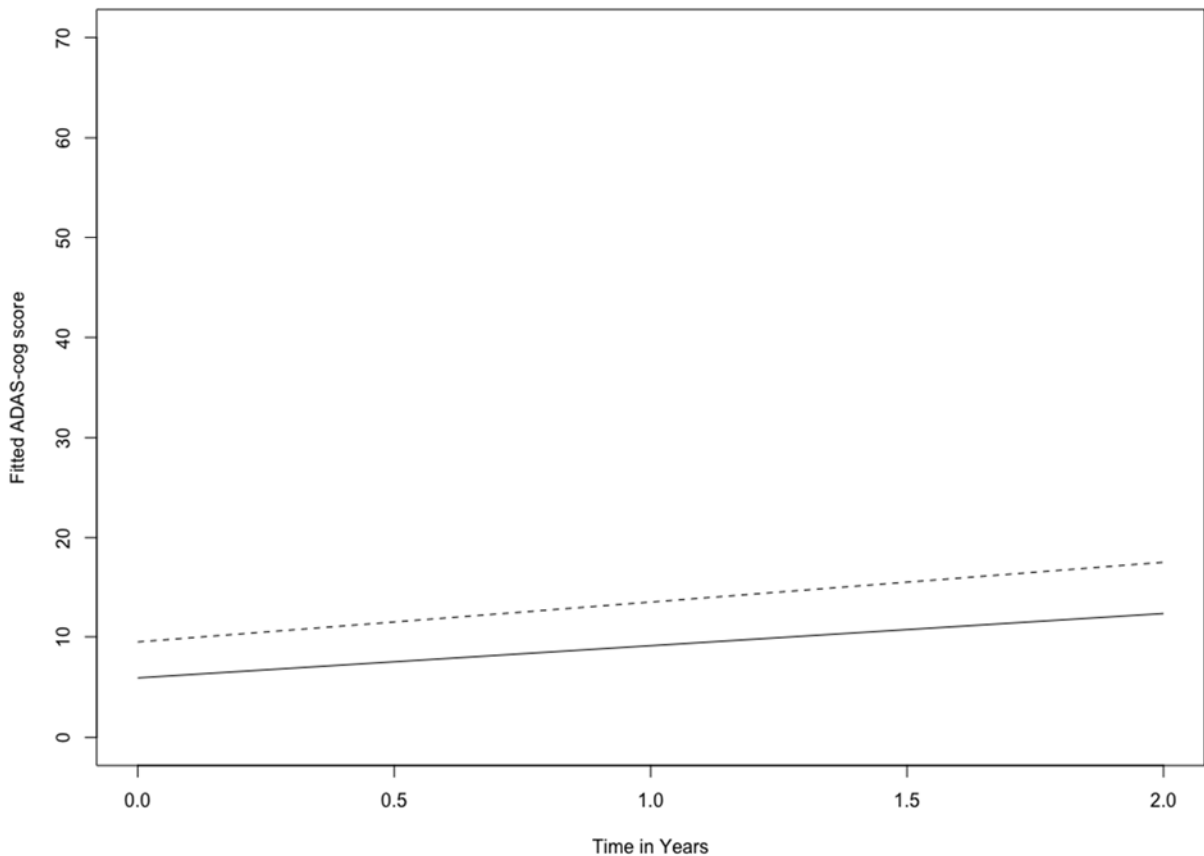

```

## Study Name
## [1] "ES"
## Full Mixed Effects Model
## Linear mixed model fit by maximum likelihood ['lmerMod']
## Formula: ADAS ~ AGE + EDUCATION + group + month + group:month + (month |
##   UID)
## Data: mixed.data
##
##   AIC   BIC logLik deviance df.resid
## 2004.6 2041.7 -992.3 1984.6   292
##
## Scaled residuals:
##   Min     1Q  Median     3Q    Max
## -2.47336 -0.52156 -0.01569  0.48441  2.62754
##
## Random effects:
## Groups Name      Variance Std.Dev. Corr
## UID   (Intercept) 62.40  7.899
##   month      15.68  3.959  0.87
## Residual      13.66  3.696
## Number of obs: 302, groups: UID, 115
##
## Fixed effects:
##           Estimate Std. Error t value
## (Intercept) 14.9766   9.8512  1.520
## AGE          0.1429   0.1177  1.215
## EDUCATION   -0.1100   0.2496 -0.441
## group1     -0.1170   1.8339 -0.064
## month       4.8566   0.7858  6.181
## group1:month 3.4706   1.5006  2.313
##
## Correlation of Fixed Effects:
##      (Intr) AGE  EDUCAT group1 month
## AGE      -0.950
## EDUCATION -0.442  0.155
## group1   -0.061  0.059 -0.135
## month    0.023 -0.002 -0.007 -0.106
## group1:mnth -0.018  0.004  0.012  0.208 -0.524
## P Value for Full vs. Reduced Model
## [1] 0.02347949

```

ES

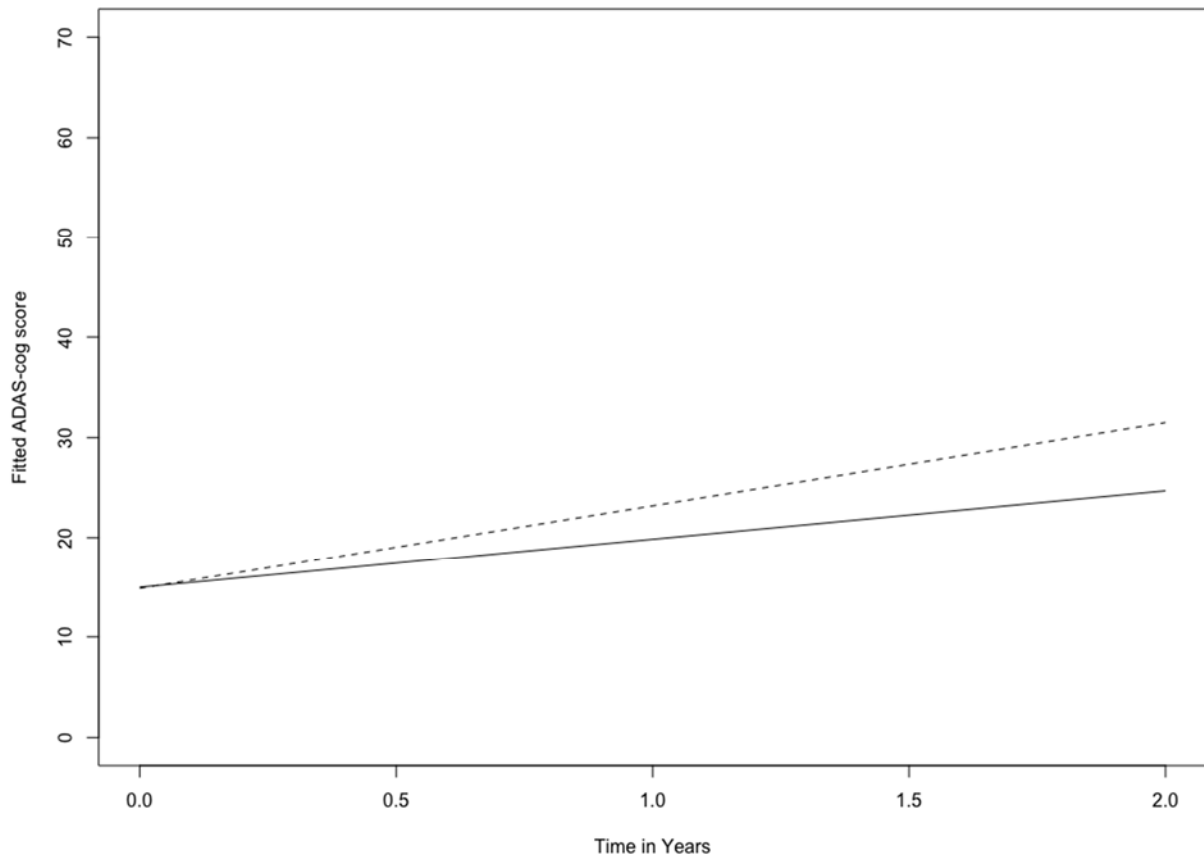

```
## Study Name
## [1] "HC"
## Full Mixed Effects Model
## Linear mixed model fit by maximum likelihood ['lmerMod']
## Formula: ADAS ~ AGE + EDUCATION + group + month + group:month + (month |
##   UID)
## Data: mixed.data
##
##   AIC   BIC logLik deviance df.resid
## 4191.7 4236.8 -2085.9 4171.7    658
##
## Scaled residuals:
##   Min     1Q  Median     3Q    Max
## -3.2083 -0.5395 -0.0379  0.4835  2.7823
##
## Random effects:
## Groups Name      Variance Std.Dev. Corr
## UID   (Intercept) 46.99   6.855
##      month      10.27   3.205  0.56
## Residual          11.58   3.403
```

```

## Number of obs: 668, groups: UID, 193
##
## Fixed effects:
##      Estimate Std. Error t value
## (Intercept) 0.76595  6.15387  0.124
## AGE         0.22354  0.07229  3.092
## EDUCATION  -0.16638  0.17366 -0.958
## group1      4.99961  1.72001  2.907
## month       2.08521  1.12879  1.847
## group1:month 0.85686  1.18793  0.721
##
## Correlation of Fixed Effects:
##      (Intr) AGE  EDUCAT group1 month
## AGE      -0.893
## EDUCATION -0.438  0.080
## group1   -0.068 -0.167 -0.073
## month    0.042 -0.015  0.005 -0.109
## group1:mnth -0.034  0.010 -0.009  0.119 -0.950
## P Value for Full vs. Reduced Model
## [1] 0.4708178

```

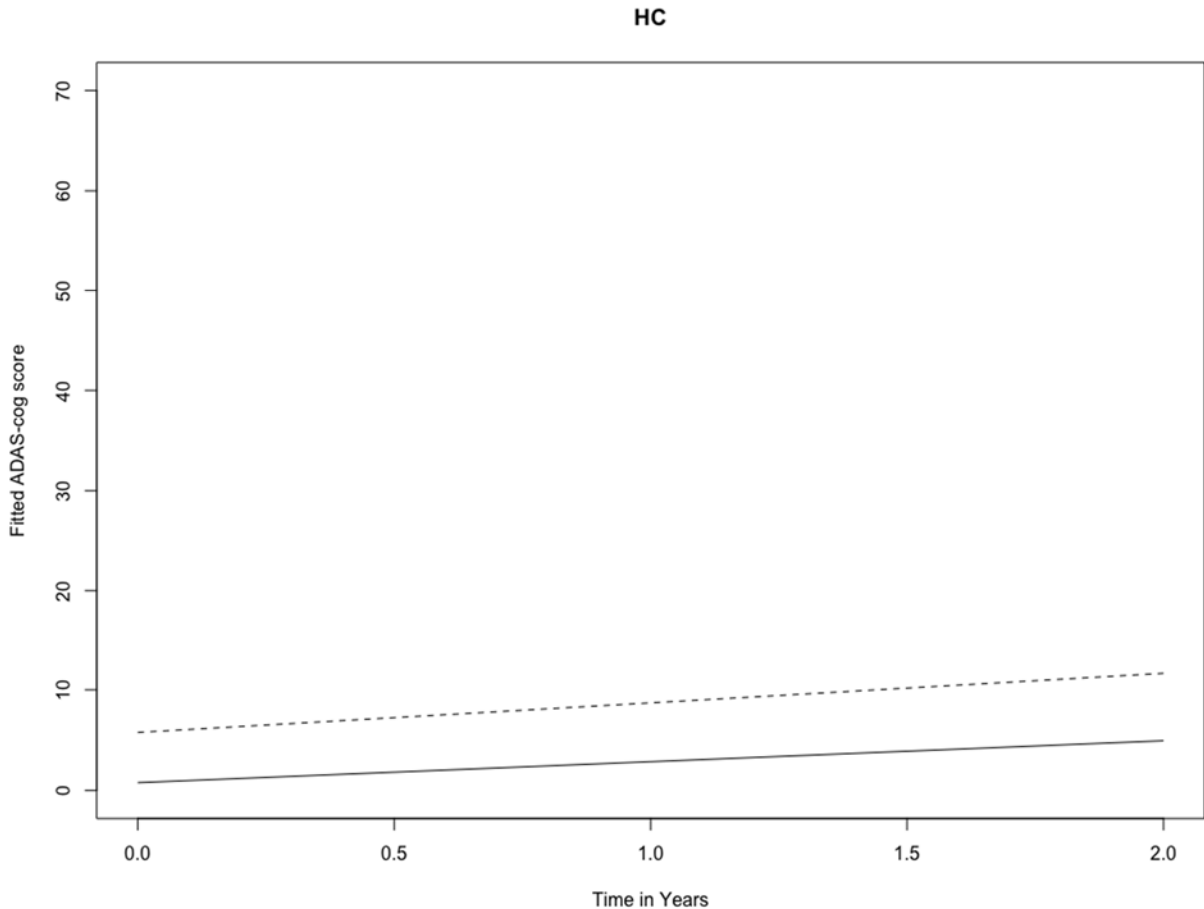

```

## Study Name
## [1] "HU"
## Full Mixed Effects Model
## Linear mixed model fit by maximum likelihood ['lmerMod']
## Formula: ADAS ~ AGE + EDUCATION + group + month + group:month + (month |
##   UID)
## Data: mixed.data
##
##   AIC   BIC logLik deviance df.resid
## 1548.8 1583.2 -764.4 1528.8   220
##
## Scaled residuals:
##   Min     1Q  Median     3Q      Max
## -1.93725 -0.53146  0.01131  0.45825  2.91594
##
## Random effects:
## Groups Name      Variance Std.Dev. Corr
## UID   (Intercept) 77.459  8.801
##   month      5.217  2.284  1.00
## Residual      14.922  3.863
## Number of obs: 230, groups: UID, 94
##
## Fixed effects:
##           Estimate Std. Error t value
## (Intercept) 12.14502  10.27778  1.182
## AGE          0.14030   0.12028  1.166
## EDUCATION   -0.04411   0.31938 -0.138
## group1       0.78853   6.80071  0.116
## month        1.66161   0.70692  2.350
## group1:month 1.05060   3.49354  0.301
##
## Correlation of Fixed Effects:
##           (Intr) AGE  EDUCAT group1 month
## AGE          -0.910
## EDUCATION   -0.372 -0.036
## group1       0.025  0.021 -0.145
## month        0.040 -0.033 -0.001 -0.014
## group1:mnth -0.022  0.010  0.025  0.200 -0.203
## P Value for Full vs. Reduced Model
## [1] 0.7645879

```



HU

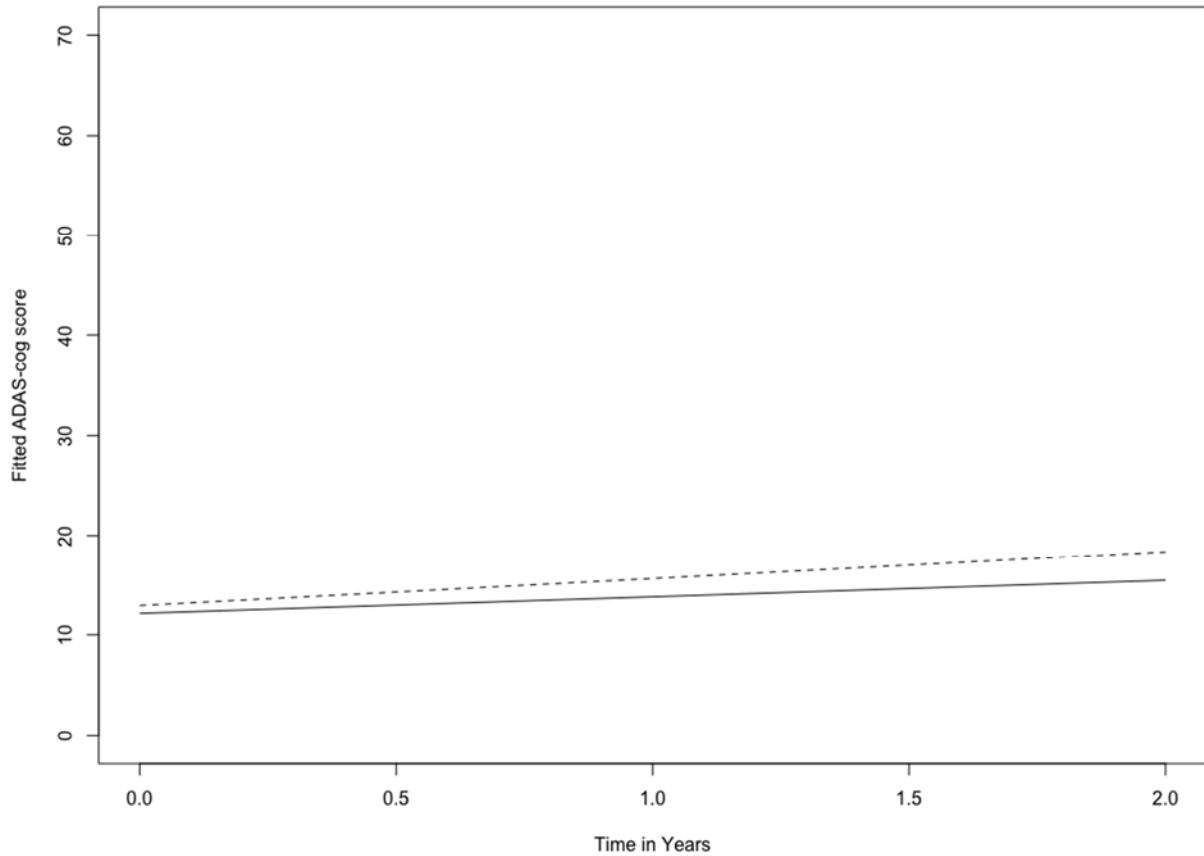

```
## Study Name
## [1] "LL"
## Full Mixed Effects Model
## Linear mixed model fit by maximum likelihood ['lmerMod']
## Formula: ADAS ~ AGE + EDUCATION + group + month + group:month + (month |
##   UID)
## Data: mixed.data
##
##   AIC   BIC logLik deviance df.resid
## 3639.9 3683.3 -1810.0 3619.9    553
##
## Scaled residuals:
##   Min     1Q  Median     3Q      Max
## -2.4868 -0.4675 -0.0148  0.4783  3.2435
##
## Random effects:
## Groups Name      Variance Std.Dev. Corr
## UID   (Intercept) 67.02   8.187
##      month      14.03   3.745  0.23
## Residual          11.85   3.442
```

```

## Number of obs: 563, groups: UID, 180
##
## Fixed effects:
##      Estimate Std. Error t value
## (Intercept) 18.18100  7.07638  2.569
## AGE          0.01529  0.07846  0.195
## EDUCATION    0.06772  0.19688  0.344
## group1       0.89764  2.53179  0.355
## month        5.06810  1.68741  3.003
## group1:month -1.20203  1.74570 -0.689
##
## Correlation of Fixed Effects:
##      (Intr) AGE  EDUCAT group1 month
## AGE          -0.846
## EDUCATION    -0.479  0.087
## group1       -0.304 -0.066  0.071
## month        -0.004 -0.003 -0.001  0.017
## group1:mnth  0.003  0.003  0.001 -0.018 -0.967
## P Value for Full vs. Reduced Model
## [1] 0.4930244

```

LL

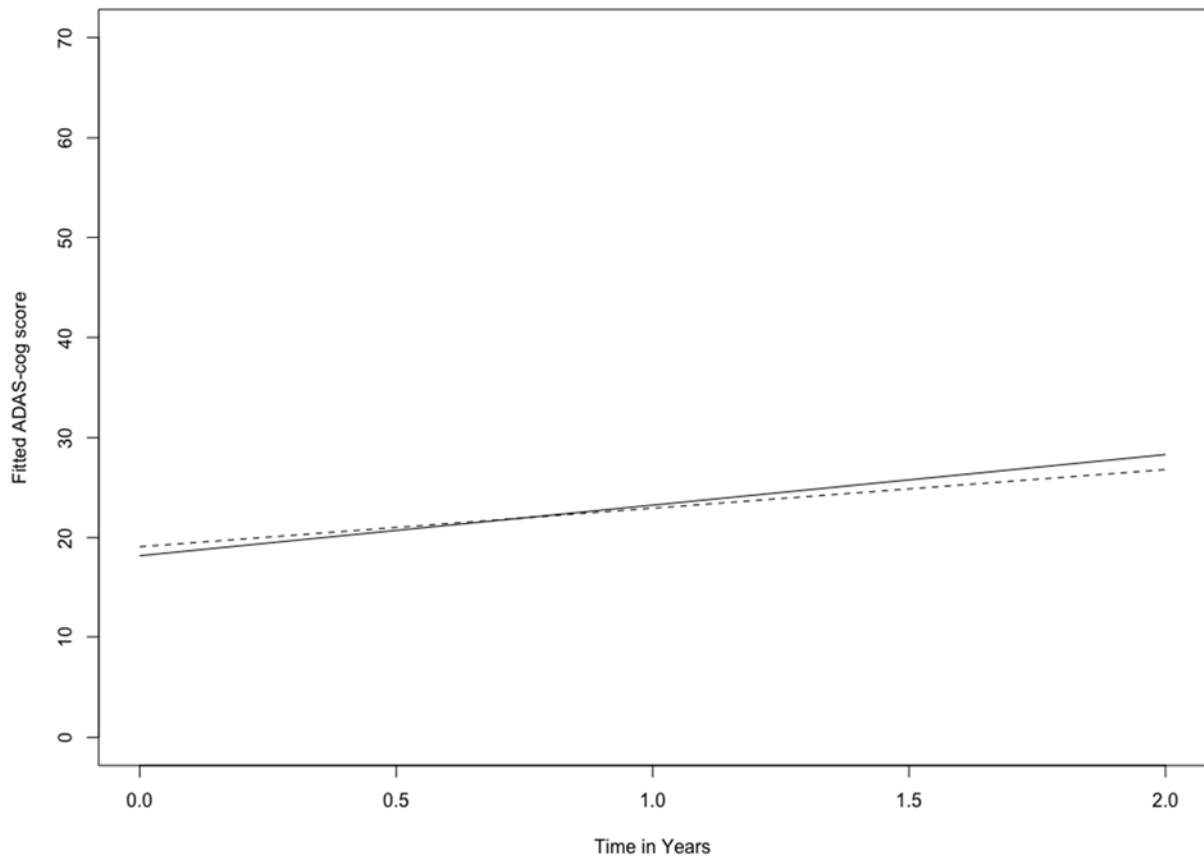

```

## Study Name
## [1] "NS"
## Full Mixed Effects Model
## Linear mixed model fit by maximum likelihood ['lmerMod']
## Formula: ADAS ~ AGE + EDUCATION + group + month + group:month + (month |
##   UID)
## Data: mixed.data
##
##   AIC   BIC logLik deviance df.resid
## 5706.5 5753.8 -2843.2 5686.5   833
##
## Scaled residuals:
##   Min     1Q  Median     3Q      Max
## -2.57400 -0.45745 -0.02595  0.44000  2.61174
##
## Random effects:
## Groups Name      Variance Std.Dev. Corr
## UID   (Intercept) 79.28   8.904
##   month      22.27   4.719   0.48
## Residual      14.05   3.748
## Number of obs: 843, groups: UID, 343
##
## Fixed effects:
##           Estimate Std. Error t value
## (Intercept) 31.46520   6.02915   5.219
## AGE         -0.11060   0.06868  -1.610
## EDUCATION   -0.07899   0.15996  -0.494
## group1      1.90681   1.41642   1.346
## month       2.20864   1.17283   1.883
## group1:month 3.60857   1.27024   2.841
##
## Correlation of Fixed Effects:
##      (Intr) AGE  EDUCAT group1 month
## AGE      -0.912
## EDUCATION -0.458  0.121
## group1   -0.280  0.129 -0.069
## month    0.009  0.004  0.003 -0.058
## group1:mnth -0.006 -0.005 -0.005  0.063 -0.923
## P Value for Full vs. Reduced Model
## [1] 0.004861028

```

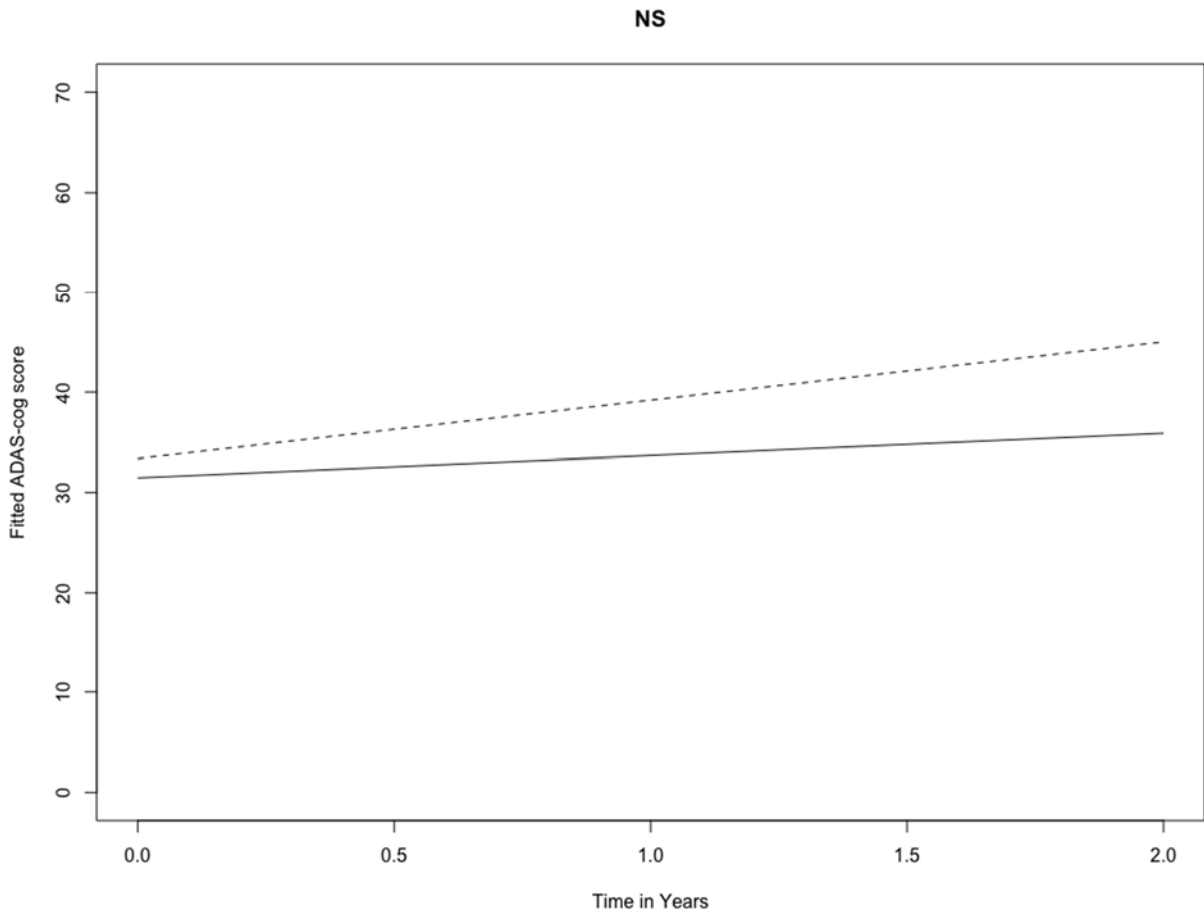

```
## Study Name
## [1] "PR"
## Full Mixed Effects Model
## Linear mixed model fit by maximum likelihood ['lmerMod']
## Formula: ADAS ~ AGE + EDUCATION + group + month + group:month + (month |
##   UID)
## Data: mixed.data
##
##   AIC   BIC logLik deviance df.resid
## 2958.4 2999.2 -1469.2 2938.4   428
##
## Scaled residuals:
##   Min     1Q  Median     3Q      Max
## -2.76980 -0.50680 -0.02234  0.47104  2.93902
##
## Random effects:
## Groups Name      Variance Std.Dev. Corr
## UID   (Intercept) 81.11   9.006
##      month      22.10   4.701   0.76
## Residual          16.67   4.083
```

```

## Number of obs: 438, groups: UID, 135
##
## Fixed effects:
##      Estimate Std. Error t value
## (Intercept) 32.78688   9.01135   3.638
## AGE         -0.06482   0.10664  -0.608
## EDUCATION   -0.43416   0.25763  -1.685
## group1      -0.12742   2.39055  -0.053
## month        5.99618   0.63927   9.380
## group1:month -2.16187   1.54065  -1.403
##
## Correlation of Fixed Effects:
##      (Intr) AGE  EDUCAT group1 month
## AGE          -0.911
## EDUCATION    -0.521  0.137
## group1       -0.051 -0.008  0.049
## month         0.053 -0.014 -0.026 -0.117
## group1:mnth  -0.032  0.014  0.017  0.356 -0.415
## P Value for Full vs. Reduced Model
## [1] 0.1620023

```

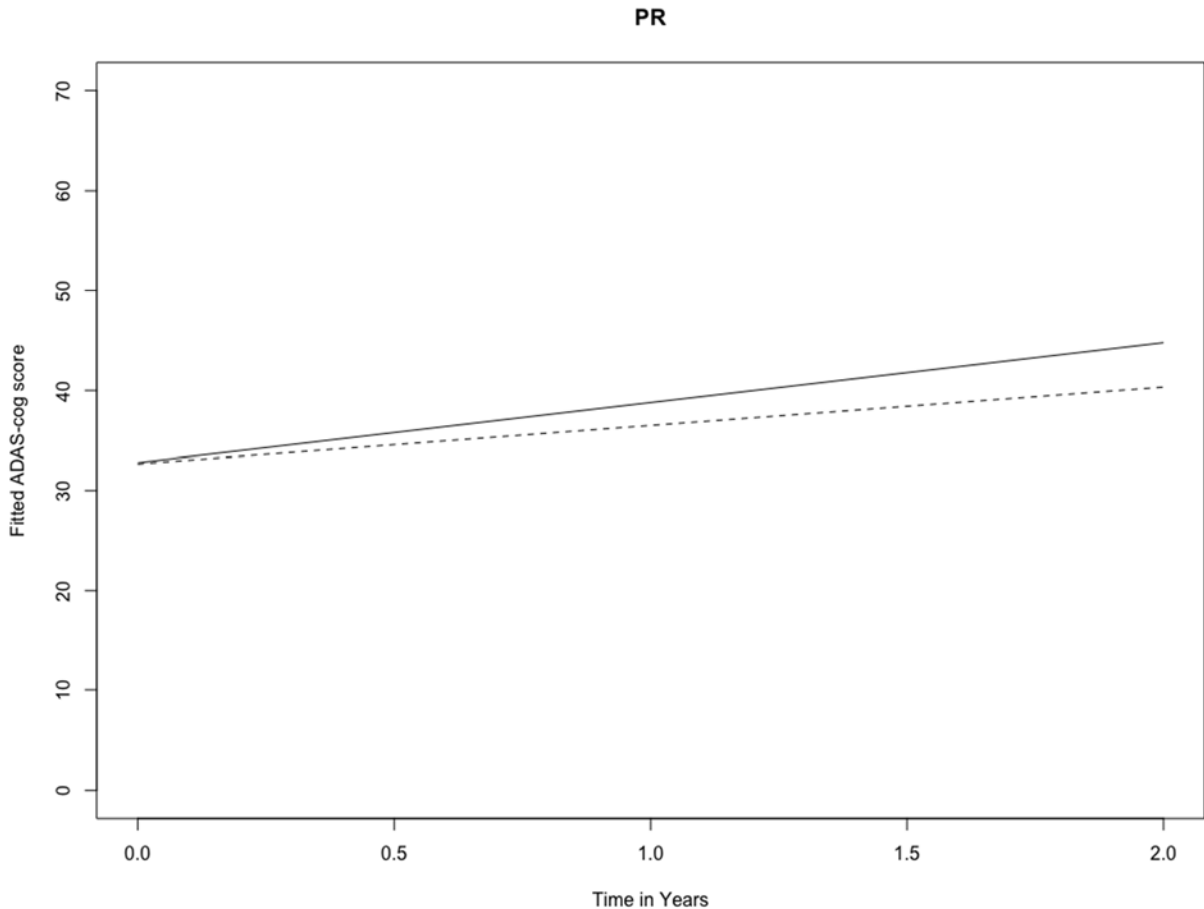

```

## Study Name
## [1] "SL"
## Full Mixed Effects Model
## Linear mixed model fit by maximum likelihood ['lmerMod']
## Formula: ADAS ~ AGE + EDUCATION + group + month + group:month + (month |
##   UID)
## Data: mixed.data
##
##   AIC   BIC logLik deviance df.resid
## 6467.8 6516.5 -3223.9 6447.8   951
##
## Scaled residuals:
##   Min    1Q  Median    3Q   Max
## -2.9713 -0.4627  0.0355  0.4802  3.1977
##
## Random effects:
## Groups Name      Variance Std.Dev. Corr
## UID   (Intercept) 105.53  10.273
##   month      14.80   3.847  0.34
## Residual      14.68   3.831
## Number of obs: 961, groups: UID, 316
##
## Fixed effects:
##           Estimate Std. Error t value
## (Intercept) 51.372173  6.398754  8.028
## AGE         -0.172115  0.076926 -2.237
## EDUCATION    0.006988  0.187404  0.037
## group1      -12.686658  7.818356 -1.623
## month        7.769544  0.356626 21.786
## group1:month 3.711581  3.751239  0.989
##
## Correlation of Fixed Effects:
##      (Intr) AGE  EDUCAT group1 month
## AGE      -0.929
## EDUCATION -0.488  0.145
## group1   -0.015  0.087 -0.191
## month    0.002  0.001  0.010 -0.007
## group1:mnth 0.001  0.000 -0.003  0.086 -0.095
## P Value for Full vs. Reduced Model
## [1] 0.3234868

```

SL

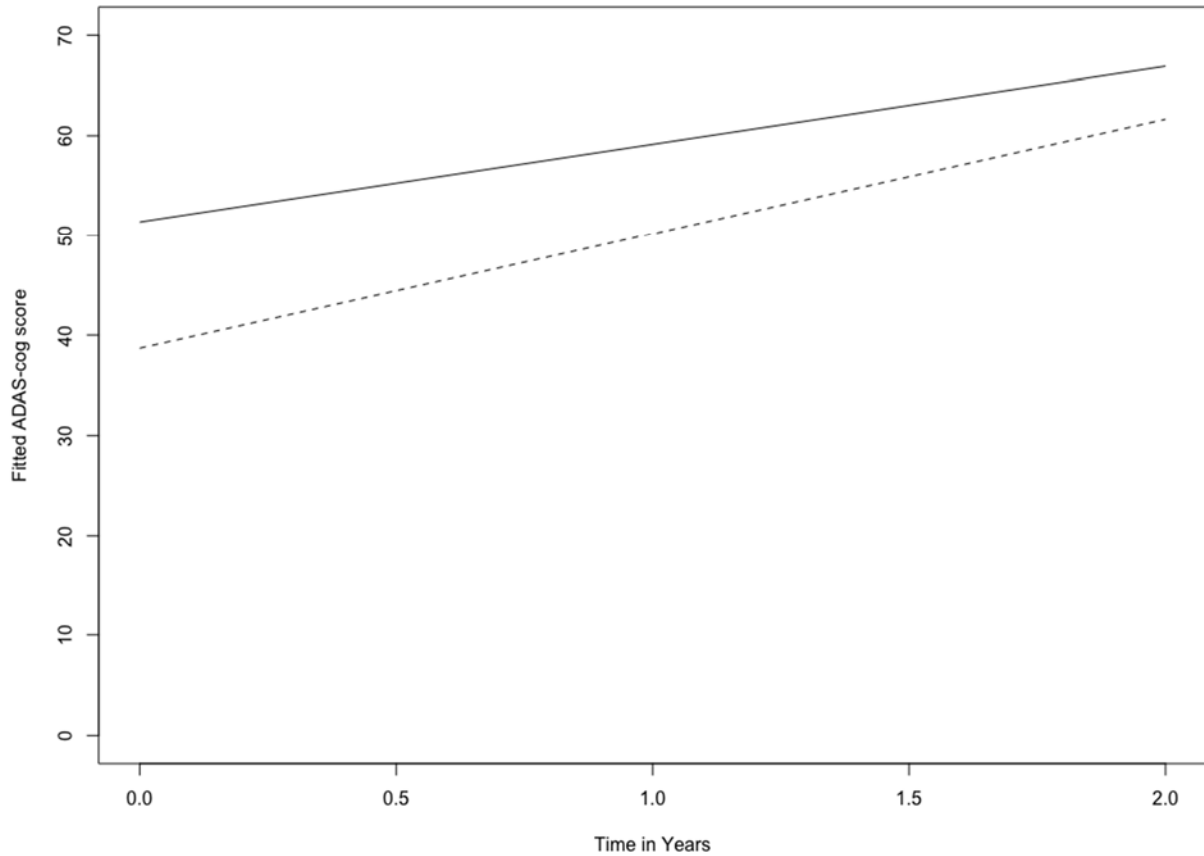

```
## Study Name
## [1] "VN"
## Full Mixed Effects Model
## Linear mixed model fit by maximum likelihood ['lmerMod']
## Formula: ADAS ~ AGE + EDUCATION + group + month + group:month + (month |
##   UID)
## Data: mixed.data
##
##   AIC   BIC logLik deviance df.resid
## 1588.4 1623.1 -784.2 1568.4   227
##
## Scaled residuals:
##   Min     1Q  Median     3Q    Max
## -3.1131 -0.4569 -0.0712  0.4505  3.3913
##
## Random effects:
## Groups Name      Variance Std.Dev. Corr
## UID   (Intercept) 58.55   7.652
##      month       26.75   5.172  0.39
## Residual          15.17   3.895
```

```

## Number of obs: 237, groups: UID, 73
##
## Fixed effects:
##      Estimate Std. Error t value
## (Intercept) 23.36473 13.52038 1.728
## AGE          0.08565 0.15289 0.560
## EDUCATION    0.03185 0.26852 0.119
## group1      -3.97281 3.62194 -1.097
## month        7.02839 2.97828 2.360
## group1:month -1.57634 3.11021 -0.507
##
## Correlation of Fixed Effects:
##      (Intr) AGE  EDUCAT group1 month
## AGE          -0.920
## EDUCATION    -0.379 0.086
## group1       -0.348 0.063 0.180
## month         0.042 -0.021 0.001 -0.091
## group1:mnth  -0.042 0.022 -0.003 0.096 -0.958
## P Value for Full vs. Reduced Model
## [1] 0.6131325

```

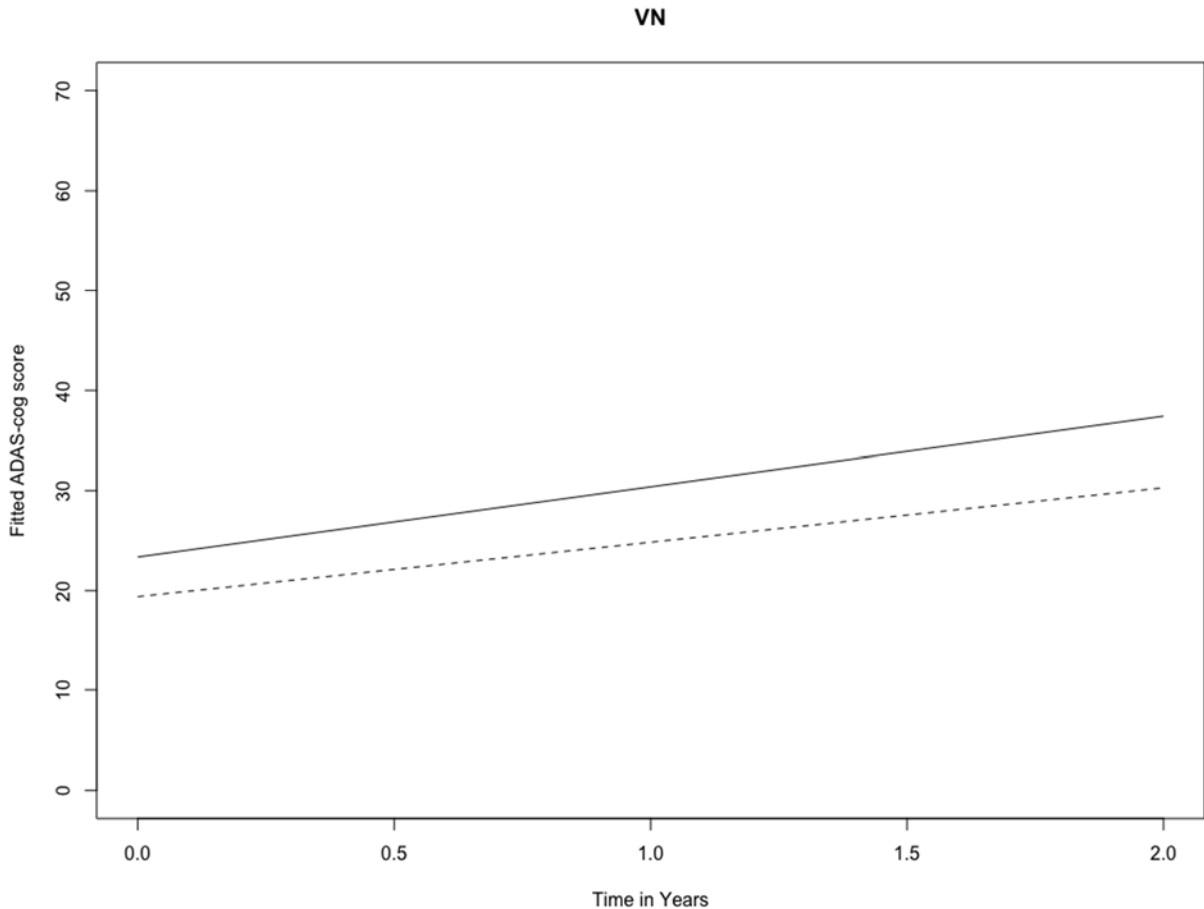



```

##
## Random-Effects Model (k = 10; tau^2 estimator: REML)
##
## tau^2 (estimated amount of total heterogeneity): 2.1046 (SE = 2.3914)
## tau (square root of estimated tau^2 value): 1.4507
## I^2 (total heterogeneity / total variability): 42.37%
## H^2 (total variability / sampling variability): 1.74
##
## Test for Heterogeneity:
## Q(df = 9) = 14.3312, p-val = 0.1110
##
## Model Results:
##
## estimate se zval pval ci.lb ci.ub
## 0.8889 0.7370 1.2061 0.2278 -0.5556 2.3334
##
## ---
## Signif. codes: 0 '***' 0.001 '**' 0.01 '*' 0.05 '.' 0.1 ' ' 1

```

### Meta-Analysis with metafor

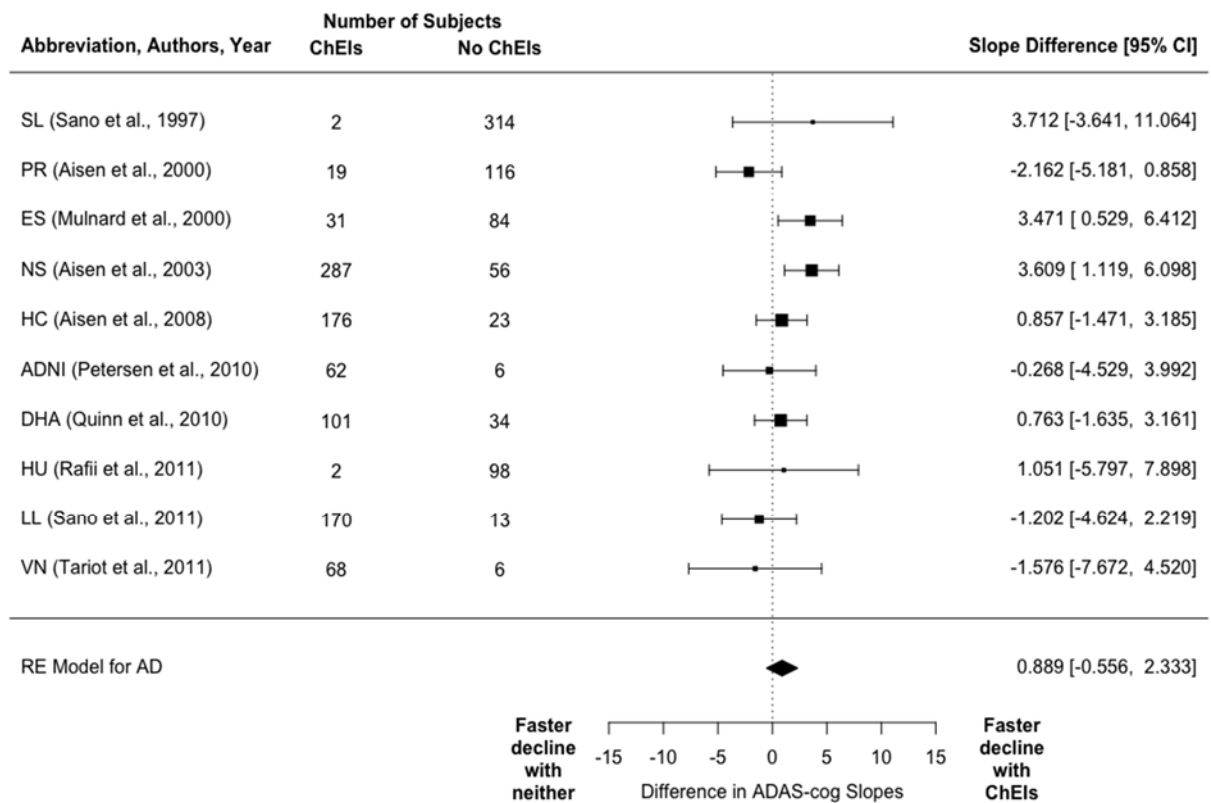

## Rates of decline for ChEIs vs. neither, with moderator of study year

### Mixed Models

```
## Study Name
## [1] "ADNI"
## Full Mixed Effects Model
## Linear mixed model fit by maximum likelihood ['lmerMod']
## Formula: ADAS ~ AGE + EDUCATION + group + month + group:month + (month |
##   UID)
## Data: mixed.data
##
##   AIC   BIC logLik deviance df.resid
## 1355.7 1389.5 -667.8 1335.7   207
##
## Scaled residuals:
##   Min     1Q  Median     3Q      Max
## -2.23216 -0.39292 -0.02574  0.36394  2.53793
##
## Random effects:
## Groups Name      Variance Std.Dev. Corr
## UID   (Intercept) 30.229   5.498
##      month      14.023   3.745   0.49
## Residual          9.804   3.131
## Number of obs: 217, groups: UID, 65
##
## Fixed effects:
##           Estimate Std. Error t value
## (Intercept) 11.77585  10.17250  1.158
## AGE         0.05206   0.12220  0.426
## EDUCATION   0.16585   0.21942  0.756
## group1     -0.41759   2.63963 -0.158
## month       4.96049   2.07887  2.386
## group1:month -0.26826   2.17385 -0.123
##
## Correlation of Fixed Effects:
##      (Intr) AGE  EDUCAT group1 month
## AGE          -0.933
## EDUCATION    -0.276  0.015
## group1       -0.204  0.017 -0.158
## month         0.016  0.013  0.063 -0.182
## group1:mnth -0.020 -0.008 -0.061  0.190 -0.956
## P Value for Full vs. Reduced Model
## [1] 0.9019588
```

### ADNI



```
## Study Name
## [1] "DHA"
## Full Mixed Effects Model
## Linear mixed model fit by maximum likelihood ['lmerMod']
## Formula: ADAS ~ AGE + EDUCATION + group + month + group:month + (month |
##   UID)
## Data: mixed.data
##
##   AIC   BIC logLik deviance df.resid
## 2872.3 2913.5 -1426.1 2852.3   445
##
## Scaled residuals:
##   Min     1Q  Median     3Q      Max
## -2.47423 -0.47238 -0.05433  0.44697  2.82137
##
## Random effects:
## Groups Name      Variance Std.Dev. Corr
## UID   (Intercept) 39.49   6.284
##      month       20.82   4.563  0.64
## Residual          11.14   3.338
```

```

## Number of obs: 455, groups: UID, 134
##
## Fixed effects:
##      Estimate Std. Error t value
## (Intercept) 5.91901  6.30850  0.938
## AGE         0.23081  0.06911  3.340
## EDUCATION  -0.46288  0.20682 -2.238
## group1      3.58044  1.39511  2.566
## month       3.20186  1.06703  3.001
## group1:month 0.76304  1.22349  0.624
##
## Correlation of Fixed Effects:
##      (Intr) AGE  EDUCAT group1 month
## AGE      -0.862
## EDUCATION -0.476  0.008
## group1   -0.268  0.089  0.057
## month     0.055 -0.009  0.008 -0.230
## group1:mnth -0.040 -0.001 -0.006  0.264 -0.872
## P Value for Full vs. Reduced Model
## [1] 0.5351913

```

**DHA**



```

## Study Name
## [1] "ES"
## Full Mixed Effects Model
## Linear mixed model fit by maximum likelihood ['lmerMod']
## Formula: ADAS ~ AGE + EDUCATION + group + month + group:month + (month |
##   UID)
## Data: mixed.data
##
##   AIC   BIC logLik deviance df.resid
## 2004.6 2041.7 -992.3 1984.6   292
##
## Scaled residuals:
##   Min     1Q  Median     3Q    Max
## -2.47336 -0.52156 -0.01569  0.48441  2.62754
##
## Random effects:
## Groups Name      Variance Std.Dev. Corr
## UID   (Intercept) 62.40  7.899
##   month      15.68  3.959  0.87
## Residual      13.66  3.696
## Number of obs: 302, groups: UID, 115
##
## Fixed effects:
##           Estimate Std. Error t value
## (Intercept) 14.9766   9.8512  1.520
## AGE          0.1429   0.1177  1.215
## EDUCATION   -0.1100   0.2496 -0.441
## group1     -0.1170   1.8339 -0.064
## month       4.8566   0.7858  6.181
## group1:month 3.4706   1.5006  2.313
##
## Correlation of Fixed Effects:
##      (Intr) AGE  EDUCAT group1 month
## AGE      -0.950
## EDUCATION -0.442  0.155
## group1   -0.061  0.059 -0.135
## month    0.023 -0.002 -0.007 -0.106
## group1:mnth -0.018  0.004  0.012  0.208 -0.524
## P Value for Full vs. Reduced Model
## [1] 0.02347949

```

ES



```
## Study Name
## [1] "HC"
## Full Mixed Effects Model
## Linear mixed model fit by maximum likelihood ['lmerMod']
## Formula: ADAS ~ AGE + EDUCATION + group + month + group:month + (month |
##   UID)
## Data: mixed.data
##
##   AIC   BIC logLik deviance df.resid
## 4191.7 4236.8 -2085.9 4171.7    658
##
## Scaled residuals:
##   Min     1Q  Median     3Q    Max
## -3.2083 -0.5395 -0.0379  0.4835  2.7823
##
## Random effects:
## Groups Name      Variance Std.Dev. Corr
## UID   (Intercept) 46.99   6.855
##      month       10.27   3.205  0.56
## Residual          11.58   3.403
```

```

## Number of obs: 668, groups: UID, 193
##
## Fixed effects:
##      Estimate Std. Error t value
## (Intercept) 0.76595  6.15387  0.124
## AGE         0.22354  0.07229  3.092
## EDUCATION   -0.16638  0.17366 -0.958
## group1      4.99961  1.72001  2.907
## month       2.08521  1.12879  1.847
## group1:month 0.85686  1.18793  0.721
##
## Correlation of Fixed Effects:
##      (Intr) AGE  EDUCAT group1 month
## AGE      -0.893
## EDUCATION -0.438  0.080
## group1   -0.068 -0.167 -0.073
## month    0.042 -0.015  0.005 -0.109
## group1:mnth -0.034  0.010 -0.009  0.119 -0.950
## P Value for Full vs. Reduced Model
## [1] 0.4708178

```

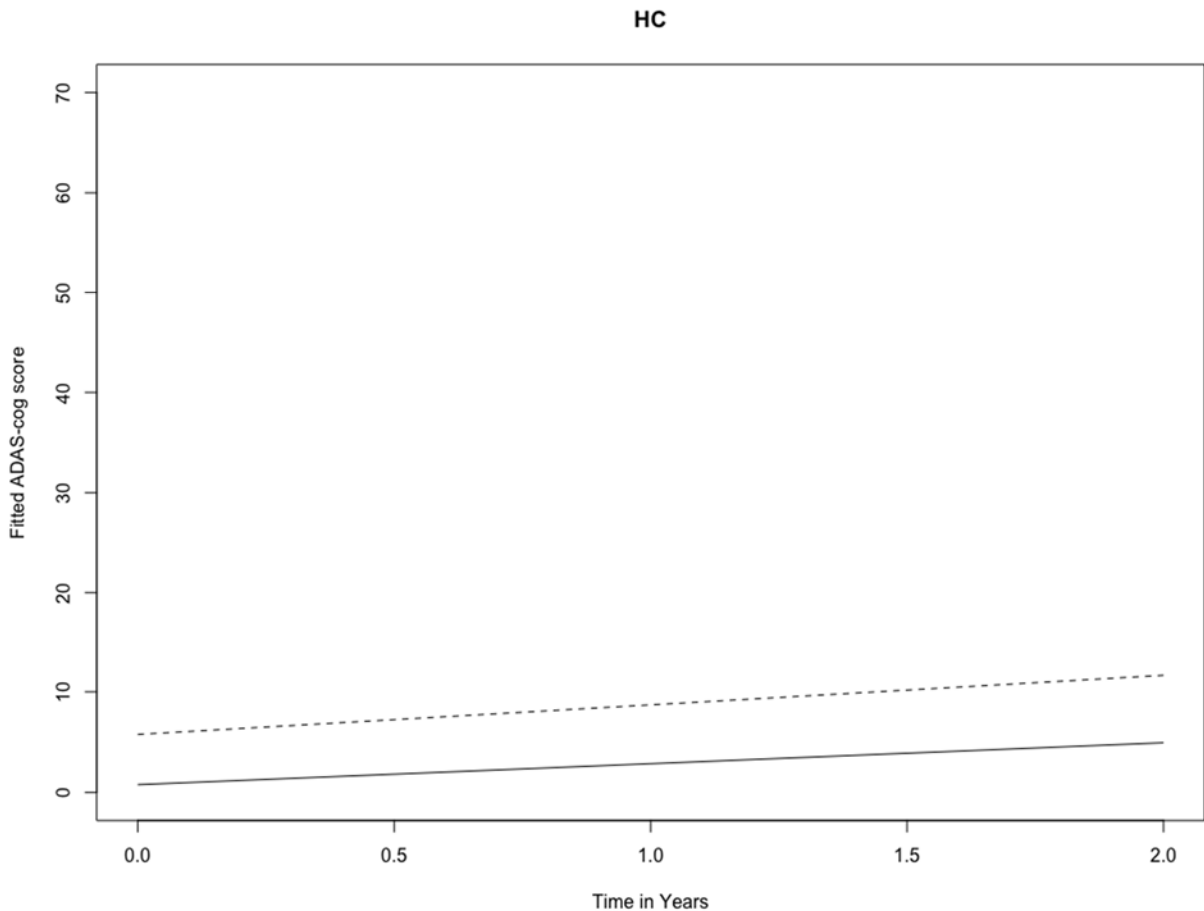

```

## Study Name
## [1] "HU"
## Full Mixed Effects Model
## Linear mixed model fit by maximum likelihood ['lmerMod']
## Formula: ADAS ~ AGE + EDUCATION + group + month + group:month + (month |
##   UID)
## Data: mixed.data
##
##   AIC   BIC logLik deviance df.resid
## 1548.8 1583.2 -764.4 1528.8   220
##
## Scaled residuals:
##   Min     1Q  Median     3Q      Max
## -1.93725 -0.53146  0.01131  0.45825  2.91594
##
## Random effects:
## Groups Name      Variance Std.Dev. Corr
## UID   (Intercept) 77.459  8.801
##   month      5.217  2.284  1.00
## Residual      14.922  3.863
## Number of obs: 230, groups: UID, 94
##
## Fixed effects:
##           Estimate Std. Error t value
## (Intercept) 12.14502  10.27778  1.182
## AGE          0.14030  0.12028  1.166
## EDUCATION   -0.04411  0.31938 -0.138
## group1      0.78853  6.80071  0.116
## month       1.66161  0.70692  2.350
## group1:month 1.05060  3.49354  0.301
##
## Correlation of Fixed Effects:
##           (Intr) AGE  EDUCAT group1 month
## AGE          -0.910
## EDUCATION   -0.372 -0.036
## group1      0.025  0.021 -0.145
## month       0.040 -0.033 -0.001 -0.014
## group1:mnth -0.022  0.010  0.025  0.200 -0.203
## P Value for Full vs. Reduced Model
## [1] 0.7645879

```



HU



```
## Study Name
## [1] "LL"
## Full Mixed Effects Model
## Linear mixed model fit by maximum likelihood ['lmerMod']
## Formula: ADAS ~ AGE + EDUCATION + group + month + group:month + (month |
##   UID)
## Data: mixed.data
##
##   AIC   BIC logLik deviance df.resid
## 3639.9 3683.3 -1810.0 3619.9    553
##
## Scaled residuals:
##   Min     1Q  Median     3Q    Max
## -2.4868 -0.4675 -0.0148  0.4783  3.2435
##
## Random effects:
## Groups Name      Variance Std.Dev. Corr
## UID   (Intercept) 67.02   8.187
##      month       14.03   3.745  0.23
## Residual          11.85   3.442
```

```

## Number of obs: 563, groups: UID, 180
##
## Fixed effects:
##      Estimate Std. Error t value
## (Intercept) 18.18100  7.07638  2.569
## AGE          0.01529  0.07846  0.195
## EDUCATION    0.06772  0.19688  0.344
## group1       0.89764  2.53179  0.355
## month        5.06810  1.68741  3.003
## group1:month -1.20203  1.74570 -0.689
##
## Correlation of Fixed Effects:
##      (Intr) AGE  EDUCAT group1 month
## AGE          -0.846
## EDUCATION    -0.479  0.087
## group1       -0.304 -0.066  0.071
## month        -0.004 -0.003 -0.001  0.017
## group1:mnth  0.003  0.003  0.001 -0.018 -0.967
## P Value for Full vs. Reduced Model
## [1] 0.4930244

```

LL

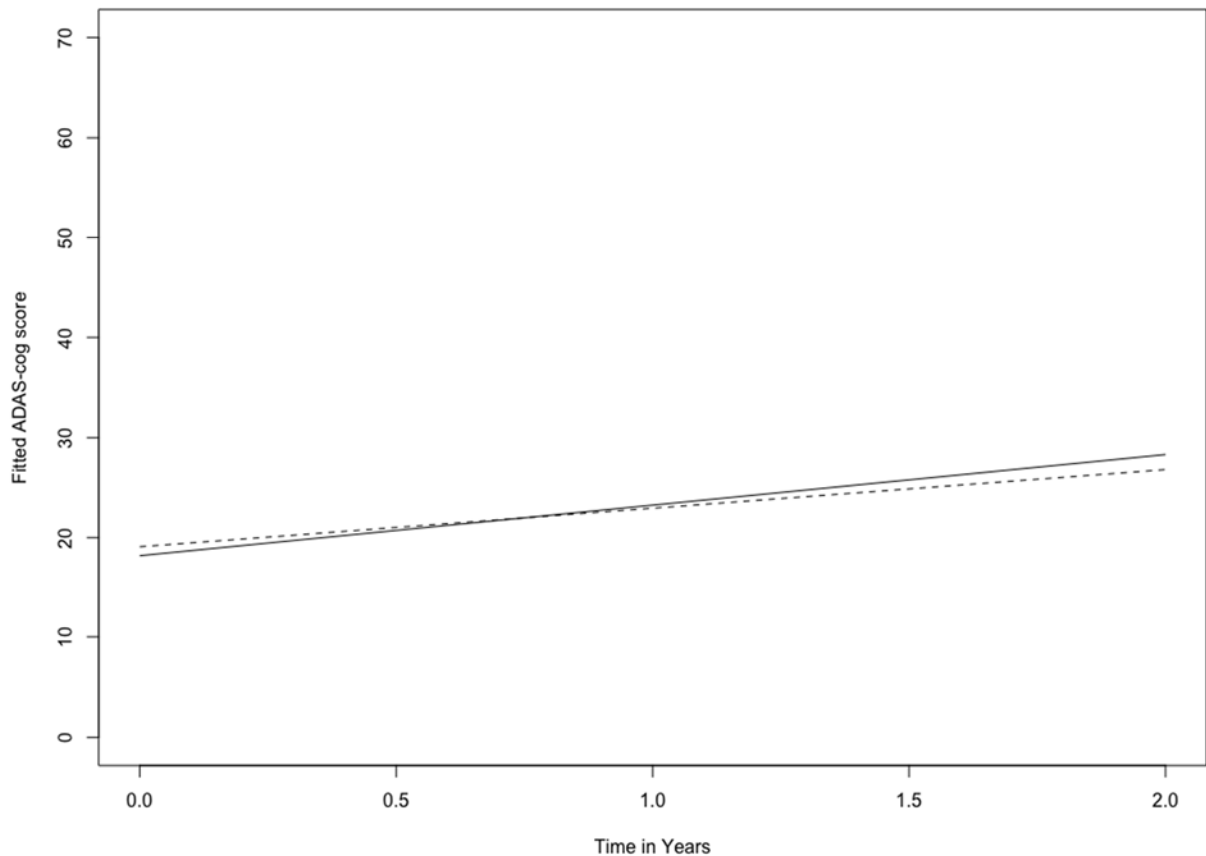

```

## Study Name
## [1] "NS"
## Full Mixed Effects Model
## Linear mixed model fit by maximum likelihood ['lmerMod']
## Formula: ADAS ~ AGE + EDUCATION + group + month + group:month + (month |
##   UID)
## Data: mixed.data
##
##   AIC   BIC logLik deviance df.resid
## 5706.5 5753.8 -2843.2 5686.5    833
##
## Scaled residuals:
##   Min     1Q  Median     3Q      Max
## -2.57400 -0.45745 -0.02595  0.44000  2.61174
##
## Random effects:
## Groups Name      Variance Std.Dev. Corr
## UID   (Intercept) 79.28   8.904
##   month      22.27   4.719   0.48
## Residual      14.05   3.748
## Number of obs: 843, groups: UID, 343
##
## Fixed effects:
##           Estimate Std. Error t value
## (Intercept) 31.46520   6.02915   5.219
## AGE         -0.11060   0.06868  -1.610
## EDUCATION   -0.07899   0.15996  -0.494
## group1      1.90681   1.41642   1.346
## month       2.20864   1.17283   1.883
## group1:month 3.60857   1.27024   2.841
##
## Correlation of Fixed Effects:
##      (Intr) AGE  EDUCAT group1 month
## AGE      -0.912
## EDUCATION -0.458  0.121
## group1   -0.280  0.129 -0.069
## month    0.009  0.004  0.003 -0.058
## group1:mnth -0.006 -0.005 -0.005  0.063 -0.923
## P Value for Full vs. Reduced Model
## [1] 0.004861028

```



```
## Study Name
## [1] "PR"
## Full Mixed Effects Model
## Linear mixed model fit by maximum likelihood ['lmerMod']
## Formula: ADAS ~ AGE + EDUCATION + group + month + group:month + (month |
##   UID)
## Data: mixed.data
##
##   AIC   BIC logLik deviance df.resid
## 2958.4 2999.2 -1469.2 2938.4   428
##
## Scaled residuals:
##   Min     1Q  Median     3Q    Max
## -2.76980 -0.50680 -0.02234  0.47104  2.93902
##
## Random effects:
## Groups Name      Variance Std.Dev. Corr
## UID   (Intercept) 81.11   9.006
##      month      22.10   4.701   0.76
## Residual          16.67   4.083
```

```

## Number of obs: 438, groups: UID, 135
##
## Fixed effects:
##      Estimate Std. Error t value
## (Intercept) 32.78688  9.01135  3.638
## AGE        -0.06482  0.10664 -0.608
## EDUCATION  -0.43416  0.25763 -1.685
## group1     -0.12742  2.39055 -0.053
## month       5.99618  0.63927  9.380
## group1:month -2.16187  1.54065 -1.403
##
## Correlation of Fixed Effects:
##      (Intr) AGE  EDUCAT group1 month
## AGE        -0.911
## EDUCATION  -0.521  0.137
## group1     -0.051 -0.008  0.049
## month       0.053 -0.014 -0.026 -0.117
## group1:mnth -0.032  0.014  0.017  0.356 -0.415
## P Value for Full vs. Reduced Model
## [1] 0.1620023

```



```

## Study Name
## [1] "SL"
## Full Mixed Effects Model
## Linear mixed model fit by maximum likelihood ['lmerMod']
## Formula: ADAS ~ AGE + EDUCATION + group + month + group:month + (month |
##   UID)
## Data: mixed.data
##
##   AIC   BIC logLik deviance df.resid
## 6467.8 6516.5 -3223.9 6447.8   951
##
## Scaled residuals:
##   Min     1Q   Median     3Q      Max
## -2.9713 -0.4627  0.0355  0.4802  3.1977
##
## Random effects:
## Groups Name      Variance Std.Dev. Corr
## UID   (Intercept) 105.53  10.273
##   month      14.80   3.847  0.34
## Residual      14.68   3.831
## Number of obs: 961, groups: UID, 316
##
## Fixed effects:
##              Estimate Std. Error t value
## (Intercept) 51.372173  6.398754  8.028
## AGE         -0.172115  0.076926 -2.237
## EDUCATION    0.006988  0.187404  0.037
## group1      -12.686658  7.818356 -1.623
## month        7.769544  0.356626 21.786
## group1:month 3.711581  3.751239  0.989
##
## Correlation of Fixed Effects:
##      (Intr) AGE  EDUCAT group1 month
## AGE      -0.929
## EDUCATION -0.488  0.145
## group1   -0.015  0.087 -0.191
## month    0.002  0.001  0.010 -0.007
## group1:mnth 0.001  0.000 -0.003  0.086 -0.095
## P Value for Full vs. Reduced Model
## [1] 0.3234868

```

SL



```
## Study Name
## [1] "VN"
## Full Mixed Effects Model
## Linear mixed model fit by maximum likelihood ['lmerMod']
## Formula: ADAS ~ AGE + EDUCATION + group + month + group:month + (month |
##   UID)
## Data: mixed.data
##
##   AIC   BIC logLik deviance df.resid
## 1588.4 1623.1 -784.2 1568.4   227
##
## Scaled residuals:
##   Min     1Q  Median     3Q    Max
## -3.1131 -0.4569 -0.0712  0.4505  3.3913
##
## Random effects:
##   Groups Name   Variance Std.Dev. Corr
##   UID   (Intercept) 58.55   7.652
##   month      26.75   5.172  0.39
## Residual      15.17   3.895
```

```

## Number of obs: 237, groups: UID, 73
##
## Fixed effects:
##      Estimate Std. Error t value
## (Intercept) 23.36473 13.52038 1.728
## AGE          0.08565 0.15289 0.560
## EDUCATION    0.03185 0.26852 0.119
## group1      -3.97281 3.62194 -1.097
## month        7.02839 2.97828 2.360
## group1:month -1.57634 3.11021 -0.507
##
## Correlation of Fixed Effects:
##      (Intr) AGE  EDUCAT group1 month
## AGE          -0.920
## EDUCATION    -0.379 0.086
## group1       -0.348 0.063 0.180
## month         0.042 -0.021 0.001 -0.091
## group1:mnth  -0.042 0.022 -0.003 0.096 -0.958
## P Value for Full vs. Reduced Model
## [1] 0.6131325

```

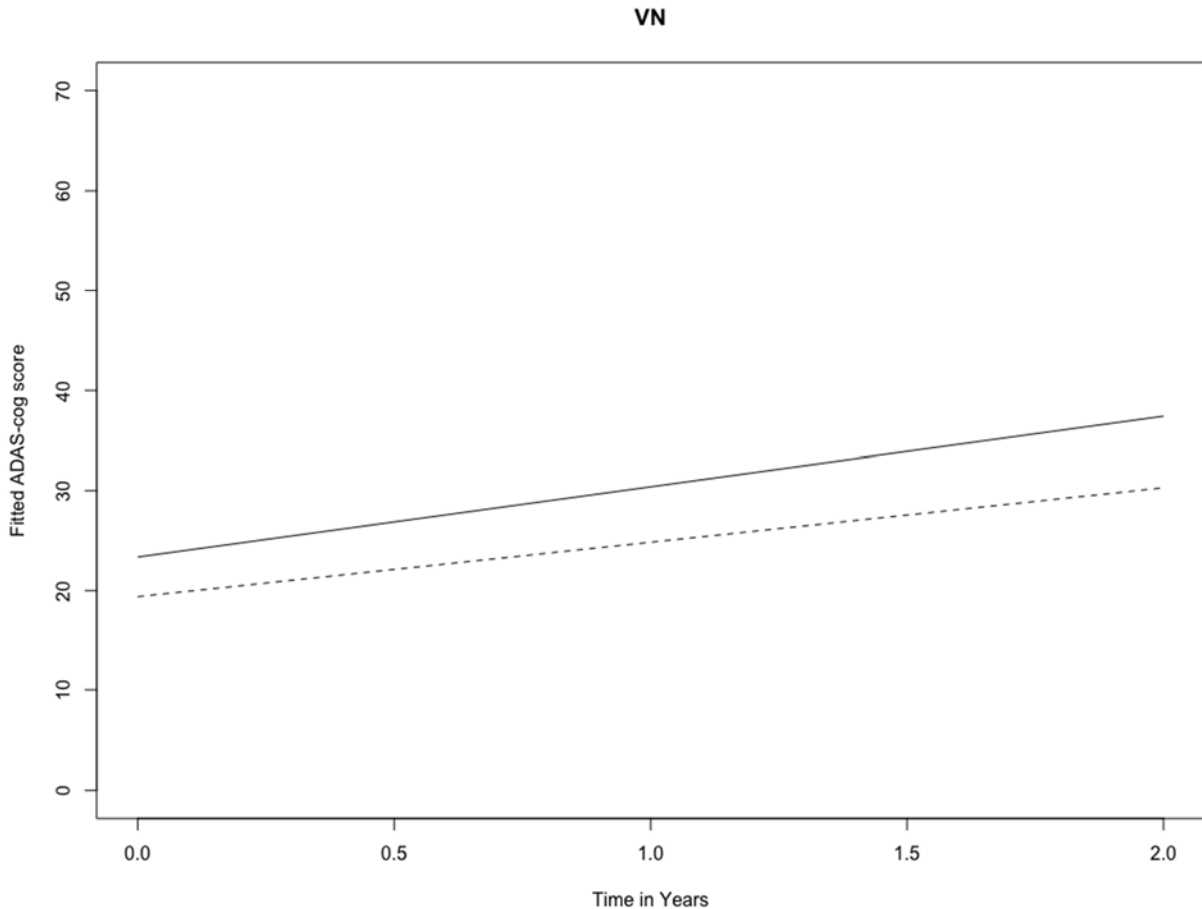



## Meta-Analysis with metafor

```
##  
## Mixed-Effects Model (k = 10; tau^2 estimator: REML)  
##  
## tau^2 (estimated amount of residual heterogeneity): 2.1276 (SE = 2.5881)  
## tau (square root of estimated tau^2 value): 1.4586  
## I^2 (residual heterogeneity / unaccounted variability): 42.00%  
## H^2 (unaccounted variability / sampling variability): 1.72  
## R^2 (amount of heterogeneity accounted for): 0.00%  
##  
## Test for Residual Heterogeneity:  
## QE(df = 8) = 12.3357, p-val = 0.1368  
##  
## Test of Moderators (coefficient(s) 2):  
## QM(df = 1) = 1.2402, p-val = 0.2654  
##  
## Model Results:  
##  
## estimate se zval pval ci.lb ci.ub  
## intrept 2.4624 1.5951 1.5438 0.1226 -0.6638 5.5887  
## mods -0.1757 0.1577 -1.1136 0.2654 -0.4848 0.1335  
##  
## ---  
## Signif. codes: 0 '***' 0.001 '**' 0.01 '*' 0.05 '.' 0.1 ' ' 1
```

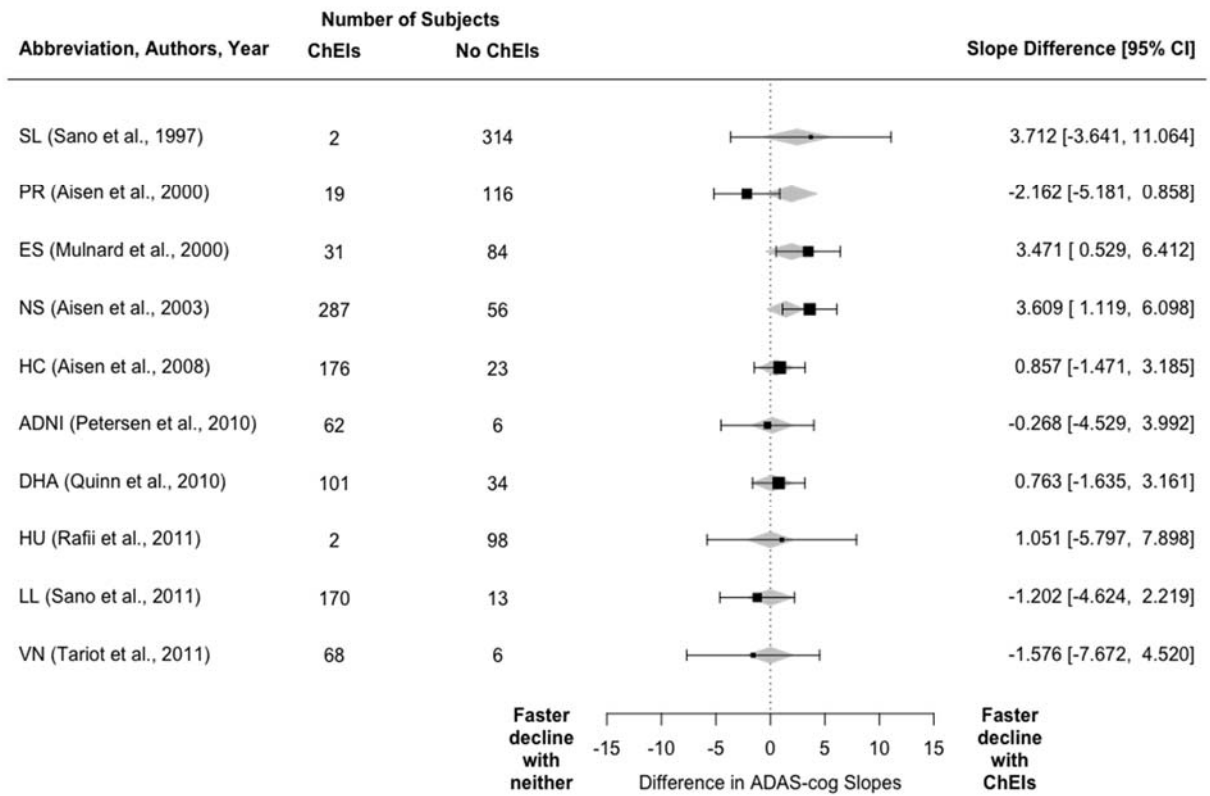

## Rates of decline for ChEIs vs. neither, with moderator of % taking meds

### Mixed Models

```
## Study Name
## [1] "ADNI"
## Full Mixed Effects Model
## Linear mixed model fit by maximum likelihood ['lmerMod']
## Formula: ADAS ~ AGE + EDUCATION + group + month + group:month + (month |
##   UID)
## Data: mixed.data
##
##   AIC   BIC logLik deviance df.resid
## 1355.7 1389.5 -667.8 1335.7   207
##
## Scaled residuals:
##   Min     1Q  Median     3Q      Max
## -2.23216 -0.39292 -0.02574  0.36394  2.53793
##
## Random effects:
## Groups Name      Variance Std.Dev. Corr
## UID   (Intercept) 30.229  5.498
##      month      14.023  3.745  0.49
## Residual          9.804  3.131
## Number of obs: 217, groups: UID, 65
##
## Fixed effects:
##           Estimate Std. Error t value
## (Intercept) 11.77585  10.17250  1.158
## AGE          0.05206  0.12220  0.426
## EDUCATION    0.16585  0.21942  0.756
## group1      -0.41759  2.63963 -0.158
## month        4.96049  2.07887  2.386
## group1:month -0.26826  2.17385 -0.123
##
## Correlation of Fixed Effects:
##      (Intr) AGE  EDUCAT group1 month
## AGE          -0.933
## EDUCATION    -0.276  0.015
## group1       -0.204  0.017 -0.158
## month         0.016  0.013  0.063 -0.182
## group1:mnth -0.020 -0.008 -0.061  0.190 -0.956
## P Value for Full vs. Reduced Model
## [1] 0.9019588
```

### ADNI

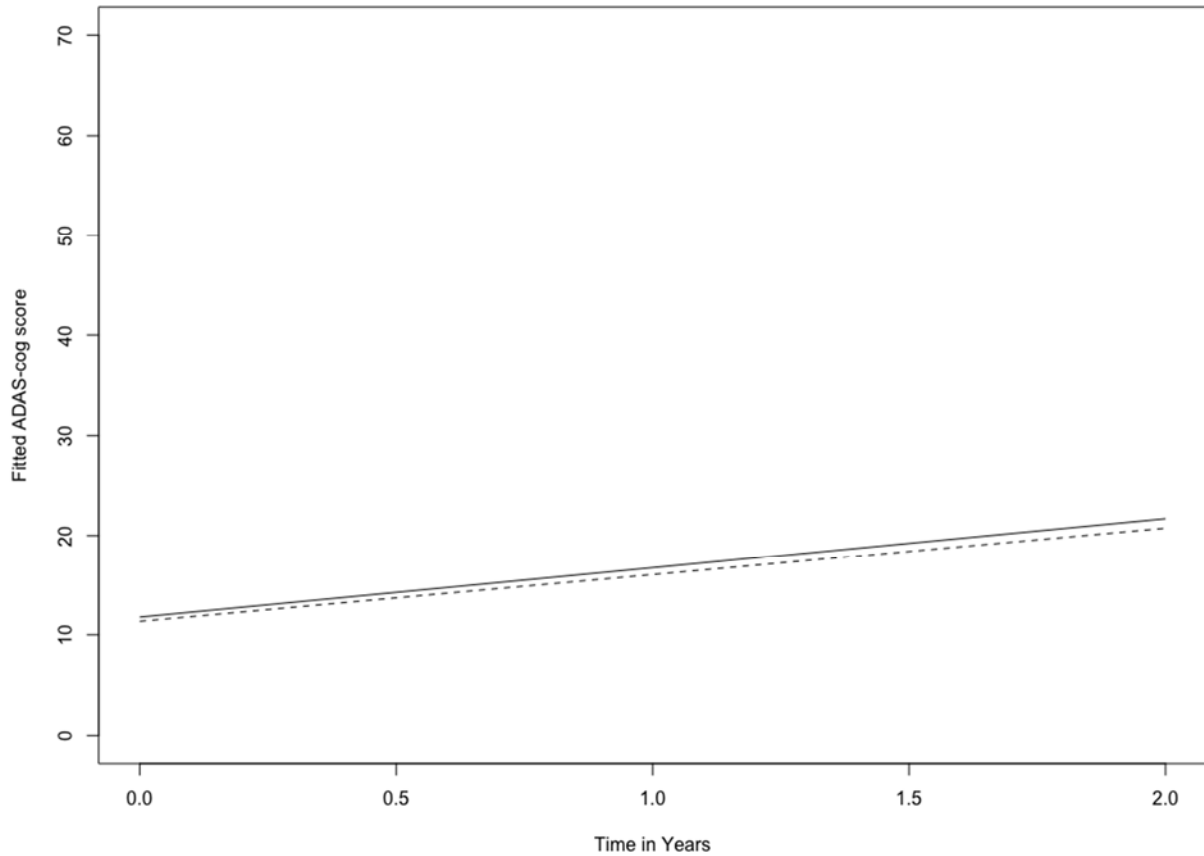

```
## Study Name
## [1] "DHA"
## Full Mixed Effects Model
## Linear mixed model fit by maximum likelihood ['lmerMod']
## Formula: ADAS ~ AGE + EDUCATION + group + month + group:month + (month |
##   UID)
## Data: mixed.data
##
##   AIC   BIC logLik deviance df.resid
## 2872.3 2913.5 -1426.1 2852.3   445
##
## Scaled residuals:
##   Min     1Q  Median     3Q      Max
## -2.47423 -0.47238 -0.05433  0.44697  2.82137
##
## Random effects:
## Groups Name      Variance Std.Dev. Corr
## UID   (Intercept) 39.49   6.284
##      month       20.82   4.563  0.64
## Residual          11.14   3.338
```

```

## Number of obs: 455, groups: UID, 134
##
## Fixed effects:
##      Estimate Std. Error t value
## (Intercept) 5.91901  6.30850  0.938
## AGE         0.23081  0.06911  3.340
## EDUCATION   -0.46288  0.20682 -2.238
## group1      3.58044  1.39511  2.566
## month       3.20186  1.06703  3.001
## group1:month 0.76304  1.22349  0.624
##
## Correlation of Fixed Effects:
##      (Intr) AGE  EDUCAT group1 month
## AGE      -0.862
## EDUCATION -0.476  0.008
## group1   -0.268  0.089  0.057
## month    0.055 -0.009  0.008 -0.230
## group1:mnth -0.040 -0.001 -0.006  0.264 -0.872
## P Value for Full vs. Reduced Model
## [1] 0.5351913

```

**DHA**



```

## Study Name
## [1] "ES"
## Full Mixed Effects Model
## Linear mixed model fit by maximum likelihood ['lmerMod']
## Formula: ADAS ~ AGE + EDUCATION + group + month + group:month + (month |
##   UID)
## Data: mixed.data
##
##   AIC   BIC logLik deviance df.resid
## 2004.6 2041.7 -992.3 1984.6   292
##
## Scaled residuals:
##   Min     1Q  Median     3Q    Max
## -2.47336 -0.52156 -0.01569  0.48441  2.62754
##
## Random effects:
## Groups Name      Variance Std.Dev. Corr
## UID   (Intercept) 62.40  7.899
##   month      15.68  3.959  0.87
## Residual      13.66  3.696
## Number of obs: 302, groups: UID, 115
##
## Fixed effects:
##           Estimate Std. Error t value
## (Intercept) 14.9766   9.8512  1.520
## AGE          0.1429   0.1177  1.215
## EDUCATION   -0.1100   0.2496 -0.441
## group1     -0.1170   1.8339 -0.064
## month       4.8566   0.7858  6.181
## group1:month 3.4706   1.5006  2.313
##
## Correlation of Fixed Effects:
##      (Intr) AGE  EDUCAT group1 month
## AGE      -0.950
## EDUCATION -0.442  0.155
## group1   -0.061  0.059 -0.135
## month    0.023 -0.002 -0.007 -0.106
## group1:mnth -0.018  0.004  0.012  0.208 -0.524
## P Value for Full vs. Reduced Model
## [1] 0.02347949

```

ES



```
## Study Name
## [1] "HC"
## Full Mixed Effects Model
## Linear mixed model fit by maximum likelihood ['lmerMod']
## Formula: ADAS ~ AGE + EDUCATION + group + month + group:month + (month |
##   UID)
## Data: mixed.data
##
##   AIC   BIC logLik deviance df.resid
## 4191.7 4236.8 -2085.9 4171.7    658
##
## Scaled residuals:
##   Min     1Q  Median     3Q    Max
## -3.2083 -0.5395 -0.0379  0.4835  2.7823
##
## Random effects:
## Groups Name      Variance Std.Dev. Corr
## UID   (Intercept) 46.99   6.855
##      month      10.27   3.205  0.56
## Residual          11.58   3.403
```

```

## Number of obs: 668, groups: UID, 193
##
## Fixed effects:
##      Estimate Std. Error t value
## (Intercept) 0.76595  6.15387  0.124
## AGE         0.22354  0.07229  3.092
## EDUCATION  -0.16638  0.17366 -0.958
## group1      4.99961  1.72001  2.907
## month       2.08521  1.12879  1.847
## group1:month 0.85686  1.18793  0.721
##
## Correlation of Fixed Effects:
##      (Intr) AGE  EDUCAT group1 month
## AGE      -0.893
## EDUCATION -0.438  0.080
## group1   -0.068 -0.167 -0.073
## month    0.042 -0.015  0.005 -0.109
## group1:mnth -0.034  0.010 -0.009  0.119 -0.950
## P Value for Full vs. Reduced Model
## [1] 0.4708178

```





```

## Study Name
## [1] "HU"
## Full Mixed Effects Model
## Linear mixed model fit by maximum likelihood ['lmerMod']
## Formula: ADAS ~ AGE + EDUCATION + group + month + group:month + (month |
##   UID)
## Data: mixed.data
##
##   AIC   BIC logLik deviance df.resid
## 1548.8 1583.2 -764.4 1528.8   220
##
## Scaled residuals:
##   Min     1Q  Median     3Q    Max
## -1.93725 -0.53146  0.01131  0.45825  2.91594
##
## Random effects:
## Groups Name      Variance Std.Dev. Corr
## UID   (Intercept) 77.459  8.801
##   month      5.217  2.284  1.00
## Residual      14.922  3.863
## Number of obs: 230, groups: UID, 94
##
## Fixed effects:
##           Estimate Std. Error t value
## (Intercept) 12.14502  10.27778  1.182
## AGE          0.14030  0.12028  1.166
## EDUCATION   -0.04411  0.31938 -0.138
## group1       0.78853  6.80071  0.116
## month        1.66161  0.70692  2.350
## group1:month 1.05060  3.49354  0.301
##
## Correlation of Fixed Effects:
##      (Intr) AGE  EDUCAT group1 month
## AGE      -0.910
## EDUCATION -0.372 -0.036
## group1    0.025  0.021 -0.145
## month     0.040 -0.033 -0.001 -0.014
## group1:mnth -0.022  0.010  0.025  0.200 -0.203
## P Value for Full vs. Reduced Model
## [1] 0.7645879

```

HU



```
## Study Name
## [1] "LL"
## Full Mixed Effects Model
## Linear mixed model fit by maximum likelihood ['lmerMod']
## Formula: ADAS ~ AGE + EDUCATION + group + month + group:month + (month |
##   UID)
## Data: mixed.data
##
##   AIC   BIC logLik deviance df.resid
## 3639.9 3683.3 -1810.0 3619.9    553
##
## Scaled residuals:
##   Min     1Q  Median     3Q    Max
## -2.4868 -0.4675 -0.0148  0.4783  3.2435
##
## Random effects:
## Groups Name      Variance Std.Dev. Corr
## UID   (Intercept) 67.02   8.187
##      month      14.03   3.745  0.23
## Residual          11.85   3.442
```

```

## Number of obs: 563, groups: UID, 180
##
## Fixed effects:
##      Estimate Std. Error t value
## (Intercept) 18.18100  7.07638  2.569
## AGE          0.01529  0.07846  0.195
## EDUCATION    0.06772  0.19688  0.344
## group1       0.89764  2.53179  0.355
## month        5.06810  1.68741  3.003
## group1:month -1.20203  1.74570 -0.689
##
## Correlation of Fixed Effects:
##      (Intr) AGE  EDUCAT group1 month
## AGE          -0.846
## EDUCATION    -0.479  0.087
## group1       -0.304 -0.066  0.071
## month        -0.004 -0.003 -0.001  0.017
## group1:mnth  0.003  0.003  0.001 -0.018 -0.967
## P Value for Full vs. Reduced Model
## [1] 0.4930244

```

LL



```

## Study Name
## [1] "NS"
## Full Mixed Effects Model
## Linear mixed model fit by maximum likelihood ['lmerMod']
## Formula: ADAS ~ AGE + EDUCATION + group + month + group:month + (month |
##   UID)
## Data: mixed.data
##
##   AIC   BIC logLik deviance df.resid
## 5706.5 5753.8 -2843.2 5686.5    833
##
## Scaled residuals:
##   Min     1Q  Median     3Q    Max
## -2.57400 -0.45745 -0.02595  0.44000  2.61174
##
## Random effects:
## Groups Name      Variance Std.Dev. Corr
## UID   (Intercept) 79.28   8.904
##   month      22.27   4.719   0.48
## Residual      14.05   3.748
## Number of obs: 843, groups: UID, 343
##
## Fixed effects:
##           Estimate Std. Error t value
## (Intercept) 31.46520   6.02915   5.219
## AGE         -0.11060   0.06868  -1.610
## EDUCATION   -0.07899   0.15996  -0.494
## group1      1.90681   1.41642   1.346
## month       2.20864   1.17283   1.883
## group1:month 3.60857   1.27024   2.841
##
## Correlation of Fixed Effects:
##      (Intr) AGE  EDUCAT group1 month
## AGE      -0.912
## EDUCATION -0.458  0.121
## group1   -0.280  0.129 -0.069
## month    0.009  0.004  0.003 -0.058
## group1:mnth -0.006 -0.005 -0.005  0.063 -0.923
## P Value for Full vs. Reduced Model
## [1] 0.004861028

```



```
## Study Name
## [1] "PR"
## Full Mixed Effects Model
## Linear mixed model fit by maximum likelihood ['lmerMod']
## Formula: ADAS ~ AGE + EDUCATION + group + month + group:month + (month |
##   UID)
## Data: mixed.data
##
##   AIC   BIC logLik deviance df.resid
## 2958.4 2999.2 -1469.2 2938.4   428
##
## Scaled residuals:
##   Min     1Q  Median     3Q    Max
## -2.76980 -0.50680 -0.02234  0.47104  2.93902
##
## Random effects:
## Groups Name      Variance Std.Dev. Corr
## UID   (Intercept) 81.11   9.006
##      month      22.10   4.701   0.76
## Residual          16.67   4.083
```

```

## Number of obs: 438, groups: UID, 135
##
## Fixed effects:
##      Estimate Std. Error t value
## (Intercept) 32.78688   9.01135   3.638
## AGE         -0.06482   0.10664  -0.608
## EDUCATION   -0.43416   0.25763  -1.685
## group1      -0.12742   2.39055  -0.053
## month        5.99618   0.63927   9.380
## group1:month -2.16187   1.54065  -1.403
##
## Correlation of Fixed Effects:
##      (Intr) AGE  EDUCAT group1 month
## AGE          -0.911
## EDUCATION    -0.521  0.137
## group1       -0.051 -0.008  0.049
## month        0.053 -0.014 -0.026 -0.117
## group1:mnth -0.032  0.014  0.017  0.356 -0.415
## P Value for Full vs. Reduced Model
## [1] 0.1620023

```



```

## Study Name
## [1] "SL"
## Full Mixed Effects Model
## Linear mixed model fit by maximum likelihood ['lmerMod']
## Formula: ADAS ~ AGE + EDUCATION + group + month + group:month + (month |
##   UID)
## Data: mixed.data
##
##   AIC   BIC logLik deviance df.resid
## 6467.8 6516.5 -3223.9 6447.8   951
##
## Scaled residuals:
##   Min     1Q   Median     3Q      Max
## -2.9713 -0.4627  0.0355  0.4802  3.1977
##
## Random effects:
## Groups Name      Variance Std.Dev. Corr
## UID   (Intercept) 105.53  10.273
##   month      14.80   3.847  0.34
## Residual      14.68   3.831
## Number of obs: 961, groups: UID, 316
##
## Fixed effects:
##           Estimate Std. Error t value
## (Intercept) 51.372173  6.398754  8.028
## AGE         -0.172115  0.076926 -2.237
## EDUCATION    0.006988  0.187404  0.037
## group1      -12.686658  7.818356 -1.623
## month        7.769544  0.356626 21.786
## group1:month 3.711581  3.751239  0.989
##
## Correlation of Fixed Effects:
##      (Intr) AGE  EDUCAT group1 month
## AGE         -0.929
## EDUCATION   -0.488  0.145
## group1      -0.015  0.087 -0.191
## month        0.002  0.001  0.010 -0.007
## group1:mnth 0.001  0.000 -0.003  0.086 -0.095
## P Value for Full vs. Reduced Model
## [1] 0.3234868

```

SL



```
## Study Name
## [1] "VN"
## Full Mixed Effects Model
## Linear mixed model fit by maximum likelihood ['lmerMod']
## Formula: ADAS ~ AGE + EDUCATION + group + month + group:month + (month |
##   UID)
## Data: mixed.data
##
##   AIC   BIC logLik deviance df.resid
## 1588.4 1623.1 -784.2 1568.4   227
##
## Scaled residuals:
##   Min     1Q  Median     3Q      Max
## -3.1131 -0.4569 -0.0712  0.4505  3.3913
##
## Random effects:
## Groups Name      Variance Std.Dev. Corr
## UID   (Intercept) 58.55   7.652
##      month       26.75   5.172  0.39
## Residual          15.17   3.895
```



```

## Number of obs: 237, groups: UID, 73
##
## Fixed effects:
##      Estimate Std. Error t value
## (Intercept) 23.36473 13.52038 1.728
## AGE         0.08565 0.15289 0.560
## EDUCATION   0.03185 0.26852 0.119
## group1     -3.97281 3.62194 -1.097
## month       7.02839 2.97828 2.360
## group1:month -1.57634 3.11021 -0.507
##
## Correlation of Fixed Effects:
##      (Intr) AGE  EDUCAT group1 month
## AGE      -0.920
## EDUCATION -0.379 0.086
## group1   -0.348 0.063 0.180
## month    0.042 -0.021 0.001 -0.091
## group1:mnth -0.042 0.022 -0.003 0.096 -0.958
## P Value for Full vs. Reduced Model
## [1] 0.6131325

```



## Meta-Analysis with metafor

```
##
## Mixed-Effects Model (k = 10; tau^2 estimator: REML)
##
## tau^2 (estimated amount of residual heterogeneity): 2.7097 (SE = 2.9241)
## tau (square root of estimated tau^2 value): 1.6461
## I^2 (residual heterogeneity / unaccounted variability): 48.20%
## H^2 (unaccounted variability / sampling variability): 1.93
## R^2 (amount of heterogeneity accounted for): 0.00%
##
## Test for Residual Heterogeneity:
## QE(df = 8) = 14.3309, p-val = 0.0735
##
## Test of Moderators (coefficient(s) 2):
## QM(df = 1) = 0.0549, p-val = 0.8148
##
## Model Results:
##
## estimate se zval pval ci.lb ci.ub
## intrept 1.2192 1.6763 0.7273 0.4670 -2.0662 4.5046
## mods -0.0053 0.0224 -0.2343 0.8148 -0.0492 0.0387
##
## ---
## Signif. codes: 0 '***' 0.001 '**' 0.01 '*' 0.05 '.' 0.1 ' ' 1
```

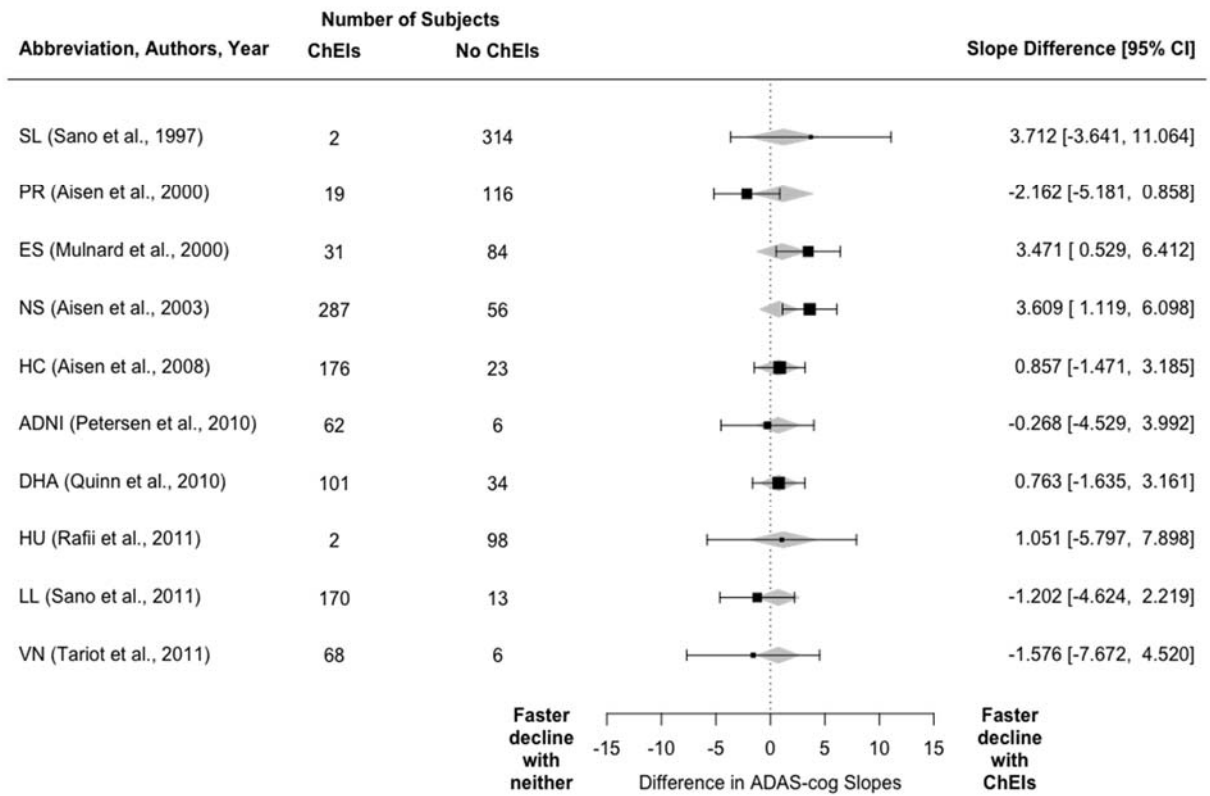

## Rates of decline for memantine (+/- ChEIs) vs. ChEIs only

### Mixed Models

```
## Study Name
## [1] "ADNI"
## Full Mixed Effects Model
## Linear mixed model fit by maximum likelihood ['lmerMod']
## Formula: ADAS ~ AGE + EDUCATION + group + month + group:month + (month |
##   UID)
## Data: mixed.data
##
##   AIC   BIC logLik deviance df.resid
## 3825.8 3869.9 -1902.9 3805.8   597
##
## Scaled residuals:
##   Min     1Q  Median     3Q    Max
## -2.26251 -0.45376 -0.02347  0.41798  2.59506
##
## Random effects:
## Groups Name      Variance Std.Dev. Corr
## UID   (Intercept) 30.34   5.508
##      month       20.24   4.498   0.48
## Residual          10.79   3.284
## Number of obs: 607, groups: UID, 173
##
## Fixed effects:
##           Estimate Std. Error t value
## (Intercept) 13.43112   5.21594   2.575
## AGE         0.06334   0.06045   1.048
## EDUCATION  -0.04356   0.15123  -0.288
## group1      1.50850   1.00789   1.497
## month       4.72455   0.73490   6.429
## group1:month 0.50066   0.89188   0.561
##
## Correlation of Fixed Effects:
##      (Intr) AGE  EDUCAT group1 month
## AGE          -0.900
## EDUCATION    -0.426  0.019
## group1       -0.202  0.162 -0.155
## month         0.021  0.008 -0.002 -0.141
## group1:mnth -0.013 -0.009 -0.005  0.182 -0.824
## P Value for Full vs. Reduced Model
## [1] 0.5752262
```

### ADNI

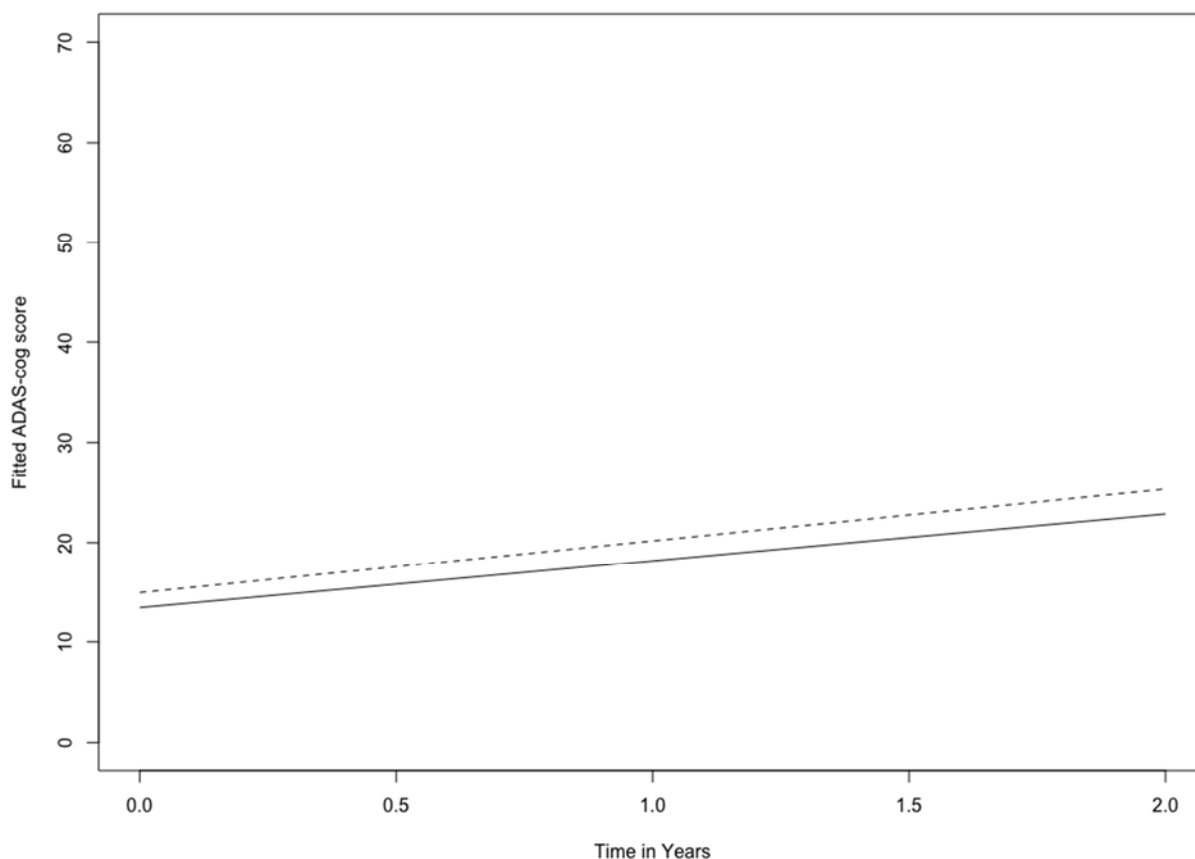

```
## Study Name
## [1] "DHA"
## Full Mixed Effects Model
## Linear mixed model fit by maximum likelihood ['lmerMod']
## Formula: ADAS ~ AGE + EDUCATION + group + month + group:month + (month |
##   UID)
## Data: mixed.data
##
##   AIC   BIC logLik deviance df.resid
## 7545.2 7595.9 -3762.6 7525.2   1170
##
## Scaled residuals:
##   Min     1Q  Median     3Q    Max
## -2.61384 -0.47988  0.00245  0.47883  2.57241
##
## Random effects:
## Groups Name      Variance Std.Dev. Corr
## UID   (Intercept) 57.56   7.587
##      month      22.30   4.722  0.57
## Residual          10.91   3.302
```

```

## Number of obs: 1180, groups: UID, 353
##
## Fixed effects:
##      Estimate Std. Error t value
## (Intercept) 15.4286  4.7024  3.281
## AGE          0.1166  0.0496  2.350
## EDUCATION   -0.2601  0.1509 -1.723
## group1       4.9019  0.9590  5.111
## month        3.9729  0.6114  6.498
## group1:month 2.0387  0.7250  2.812
##
## Correlation of Fixed Effects:
##      (Intr) AGE  EDUCAT group1 month
## AGE          -0.881
## EDUCATION    -0.579  0.163
## group1       -0.151  0.048 -0.071
## month         0.054 -0.011  0.000 -0.223
## group1:mnth -0.036  0.003 -0.009  0.260 -0.843
## P Value for Full vs. Reduced Model
## [1] 0.005062576

```

**DHA**

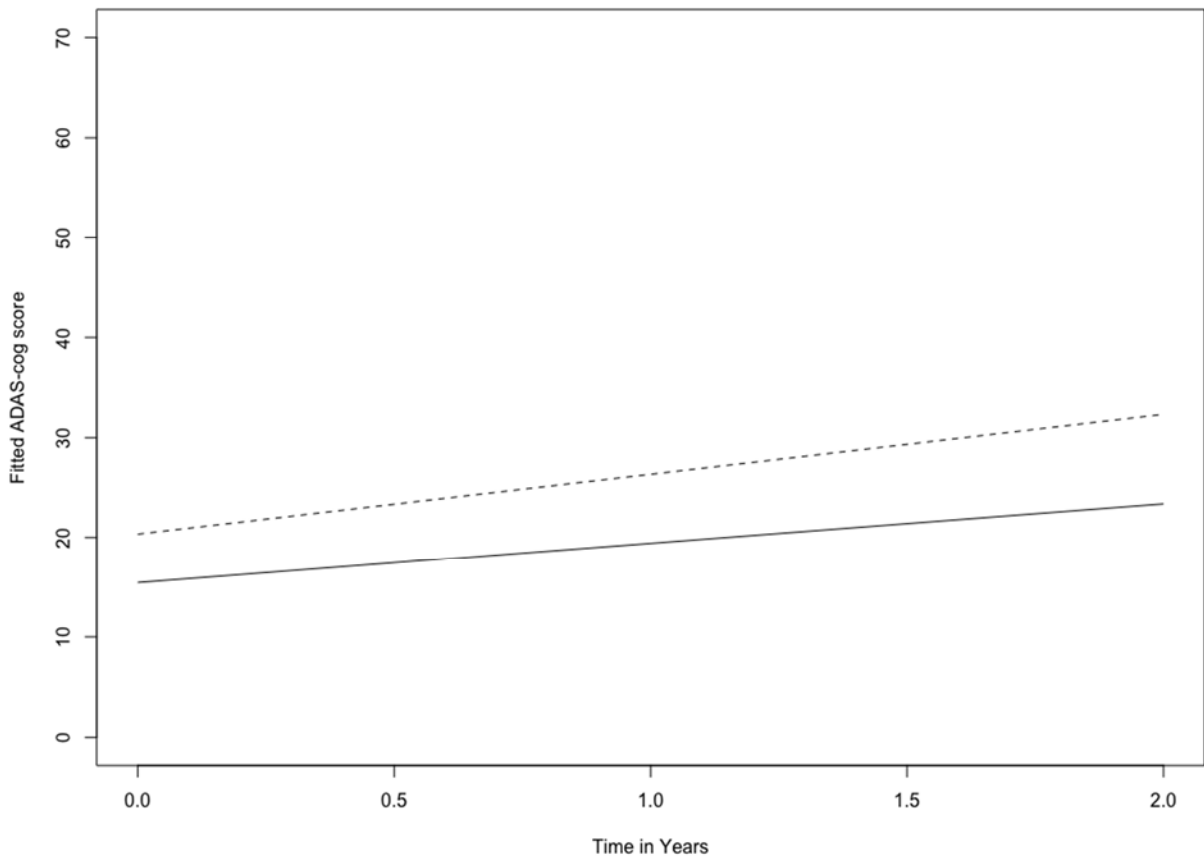

```

## Study Name
## [1] "HC"
## Full Mixed Effects Model
## Linear mixed model fit by maximum likelihood ['lmerMod']
## Formula: ADAS ~ AGE + EDUCATION + group + month + group:month + (month |
##   UID)
## Data: mixed.data
##
##   AIC   BIC logLik deviance df.resid
## 8260.1 8311.6 -4120.0 8240.1  1273
##
## Scaled residuals:
##   Min     1Q   Median     3Q      Max
## -3.1929 -0.5029 -0.0233  0.4700  4.0560
##
## Random effects:
## Groups Name      Variance Std.Dev. Corr
## UID   (Intercept) 54.89   7.409
##      month      16.41   4.051  0.42
## Residual      13.12   3.622
## Number of obs: 1283, groups: UID, 361
##
## Fixed effects:
##           Estimate Std. Error t value
## (Intercept) 15.01354  4.88852  3.071
## AGE          0.16131  0.05513  2.926
## EDUCATION   -0.49051  0.14001 -3.503
## group1      4.01666  0.85470  4.699
## month       2.95427  0.43377  6.811
## group1:month 2.76470  0.59132  4.675
##
## Correlation of Fixed Effects:
##      (Intr) AGE  EDUCAT group1 month
## AGE      -0.912
## EDUCATION -0.480  0.101
## group1   -0.138  0.093 -0.086
## month    0.023 -0.009 -0.008 -0.066
## group1:mnth -0.016  0.005  0.010  0.089 -0.734
## P Value for Full vs. Reduced Model
## [1] 4.473328e-06

```

HC

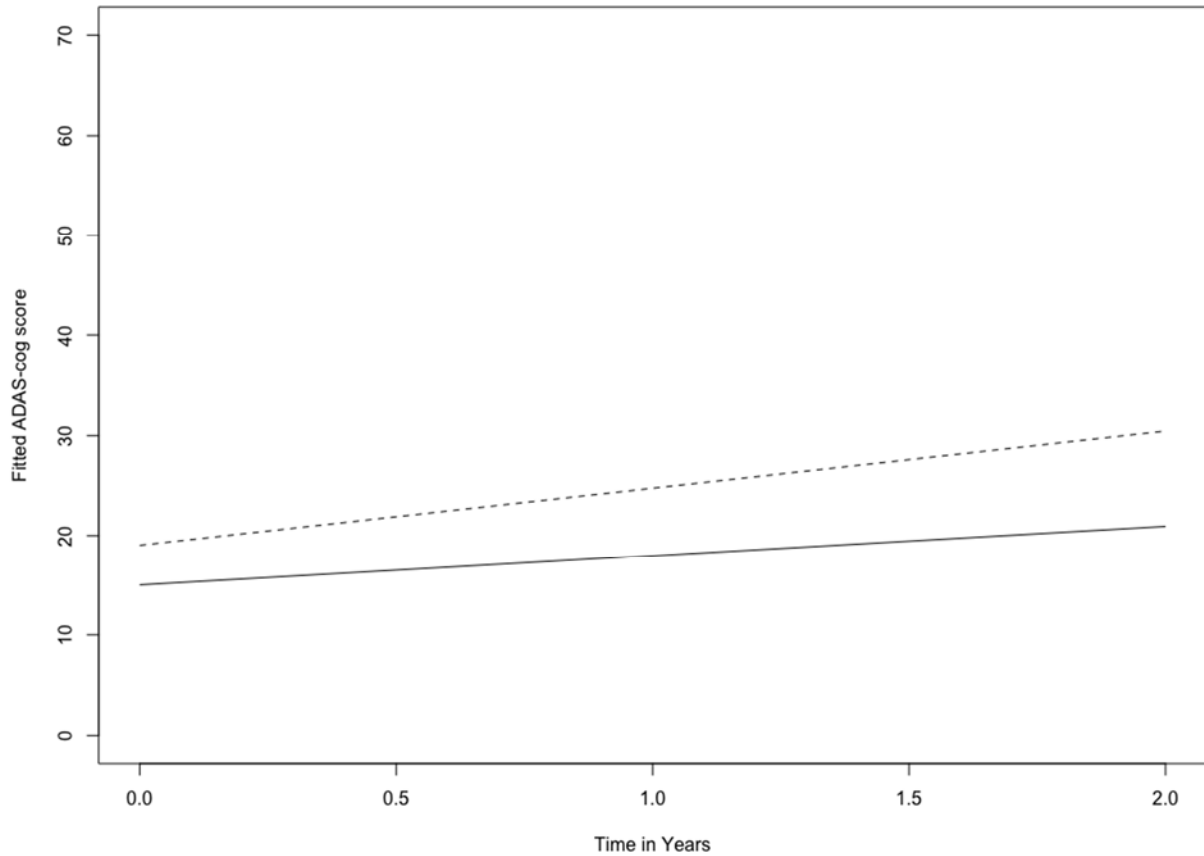

```
## Study Name
## [1] "HU"
## Full Mixed Effects Model
## Linear mixed model fit by maximum likelihood ['lmerMod']
## Formula: ADAS ~ AGE + EDUCATION + group + month + group:month + (month |
##   UID)
## Data: mixed.data
##
##   AIC   BIC logLik deviance df.resid
## 1681.8 1716.9 -830.9 1661.8   236
##
## Scaled residuals:
##   Min     1Q  Median     3Q    Max
## -2.16585 -0.47352 -0.01075  0.48386  2.31685
##
## Random effects:
## Groups Name      Variance Std.Dev. Corr
## UID   (Intercept) 107.423 10.364
##      month        2.608  1.615  0.75
## Residual          15.910  3.989
```



```

## Number of obs: 246, groups: UID, 97
##
## Fixed effects:
##      Estimate Std. Error t value
## (Intercept) 52.9841  15.5889  3.399
## AGE        -0.2617   0.1536 -1.703
## EDUCATION  -0.5873   0.3212 -1.828
## group1      4.7030   7.8414  0.600
## month       2.6606   3.3151  0.803
## group1:month -1.0131   3.3770 -0.300
##
## Correlation of Fixed Effects:
##      (Intr) AGE  EDUCAT group1 month
## AGE          -0.804
## EDUCATION    -0.413  0.107
## group1       -0.532  0.015  0.097
## month        0.006  0.004  0.011 -0.024
## group1:mnth -0.006 -0.004 -0.010  0.024 -0.982
## P Value for Full vs. Reduced Model
## [1] 0.7669275

```

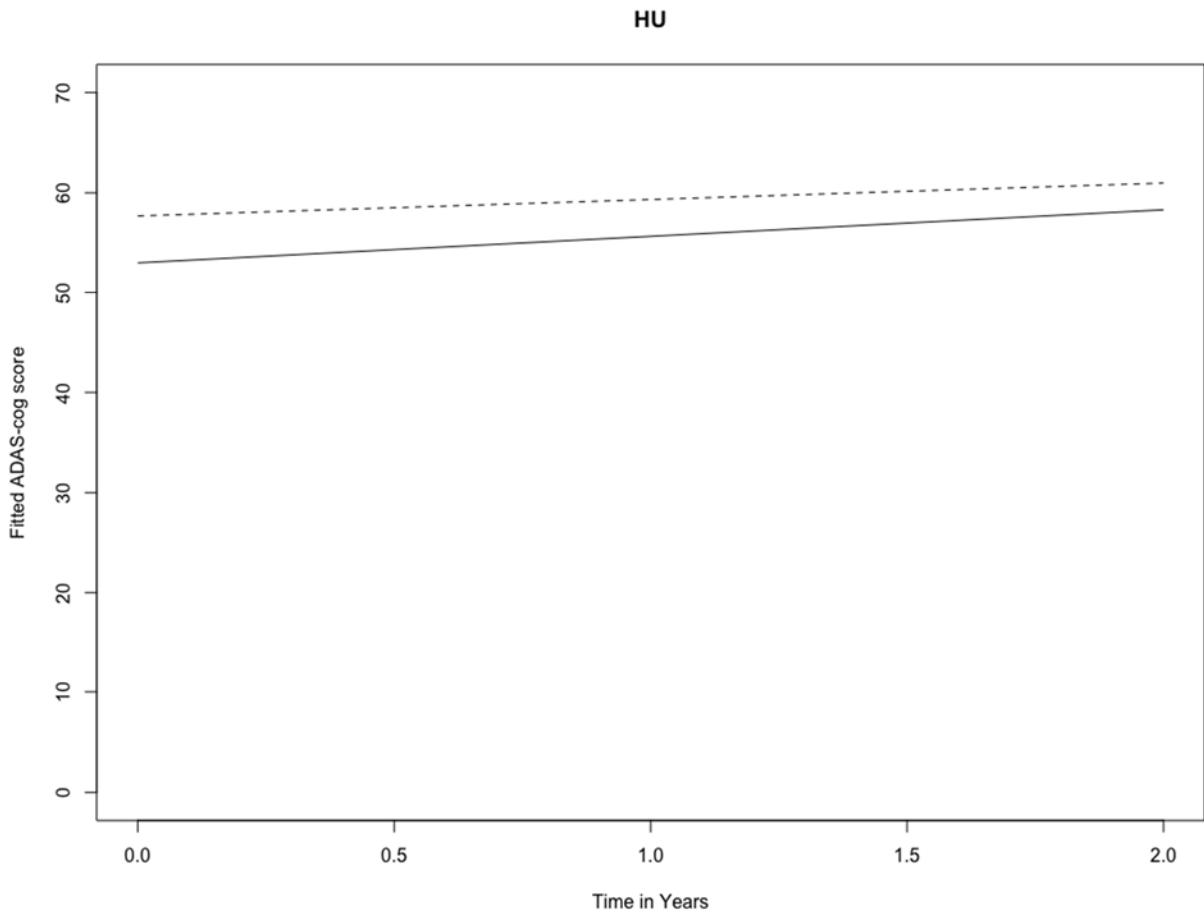

```

## Study Name
## [1] "LL"
## Full Mixed Effects Model
## Linear mixed model fit by maximum likelihood ['lmerMod']
## Formula: ADAS ~ AGE + EDUCATION + group + month + group:month + (month |
##   UID)
## Data: mixed.data
##
##   AIC   BIC logLik deviance df.resid
## 8060.9 8111.9 -4020.4 8040.9   1209
##
## Scaled residuals:
##   Min     1Q  Median     3Q      Max
## -2.45904 -0.48528 -0.00988  0.45778  2.97316
##
## Random effects:
## Groups Name      Variance Std.Dev. Corr
## UID   (Intercept) 82.58   9.087
##   month      18.82   4.339   0.34
## Residual      13.63   3.692
## Number of obs: 1219, groups: UID, 373
##
## Fixed effects:
##           Estimate Std. Error t value
## (Intercept) 20.488283  4.829999  4.242
## AGE          0.006948  0.054431  0.128
## EDUCATION    0.010258  0.159901  0.064
## group1       5.056426  1.026693  4.925
## month        3.977156  0.500995  7.939
## group1:month 2.422437  0.657554  3.684
##
## Correlation of Fixed Effects:
##      (Intr) AGE  EDUCAT group1 month
## AGE      -0.878
## EDUCATION -0.505  0.060
## group1   -0.144  0.123 -0.160
## month     0.014 -0.001 -0.006 -0.049
## group1:mnth -0.010  0.000  0.005  0.066 -0.762
## P Value for Full vs. Reduced Model
## [1] 0.000262101

```

LL

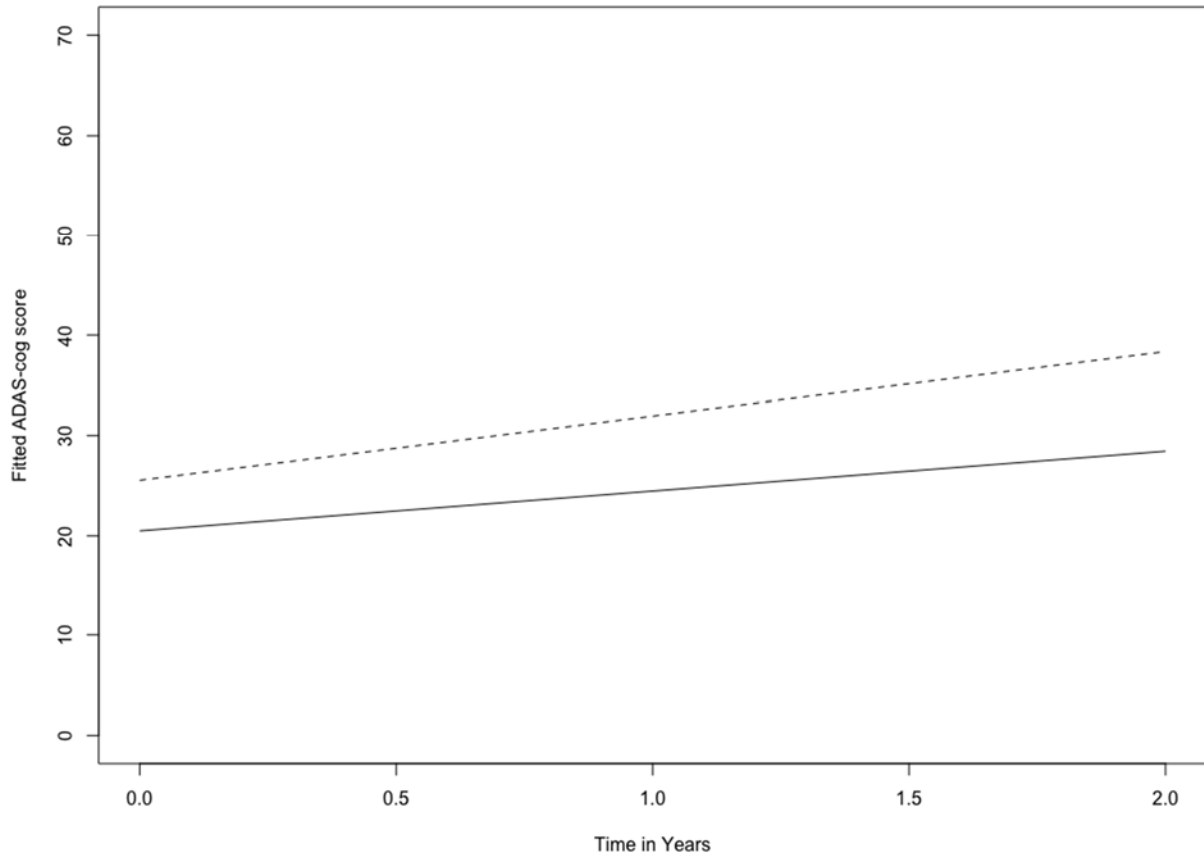

```
## Study Name
## [1] "VN"
## Full Mixed Effects Model
## Linear mixed model fit by maximum likelihood ['lmerMod']
## Formula: ADAS ~ AGE + EDUCATION + group + month + group:month + (month |
##   UID)
## Data: mixed.data
##
##   AIC   BIC logLik deviance df.resid
## 5633.5 5681.0 -2806.8 5613.5    840
##
## Scaled residuals:
##   Min     1Q  Median     3Q    Max
## -2.9715 -0.4960 -0.0157  0.4295  3.9849
##
## Random effects:
## Groups Name      Variance Std.Dev. Corr
## UID   (Intercept) 63.44   7.965
##      month      13.59   3.686  0.32
## Residual          16.11   4.014
```

```

## Number of obs: 850, groups: UID, 275
##
## Fixed effects:
##      Estimate Std. Error t value
## (Intercept) 35.33160  5.90774  5.981
## AGE        -0.09639  0.06730 -1.432
## EDUCATION  -0.09911  0.15953 -0.621
## group1     3.32177  1.25067  2.656
## month      5.06683  0.72732  6.966
## group1:month 1.43710  0.84547  1.700
##
## Correlation of Fixed Effects:
##      (Intr) AGE  EDUCAT group1 month
## AGE        -0.922
## EDUCATION  -0.433  0.098
## group1     -0.234  0.149 -0.146
## month      0.002  0.002 -0.003 -0.010
## group1:mnth -0.002 -0.002  0.006  0.009 -0.860
## P Value for Full vs. Reduced Model
## [1] 0.0932488

```

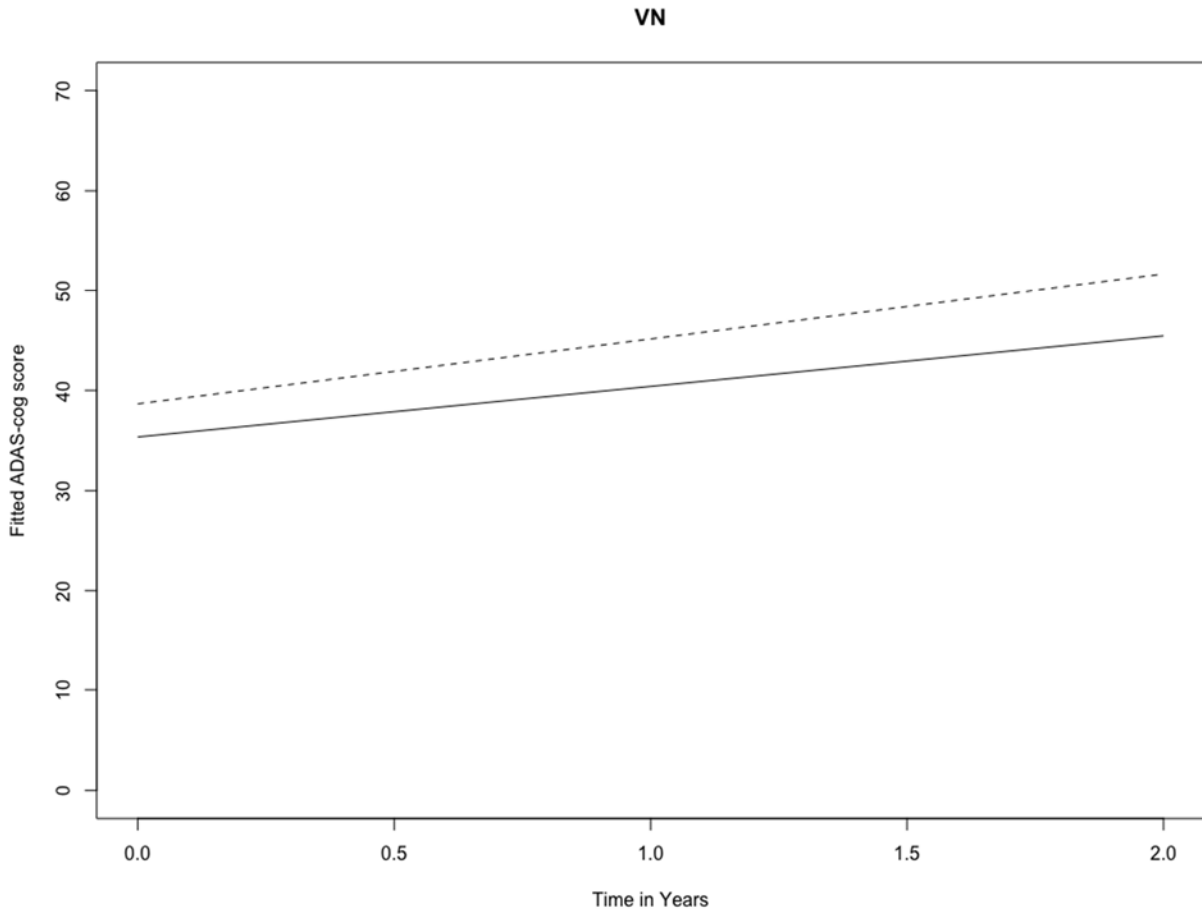

## Meta-analysis with metafor

```
##
## Random-Effects Model (k = 6; tau^2 estimator: REML)
##
## tau^2 (estimated amount of total heterogeneity): 0.1538 (SE = 0.4763)
## tau (square root of estimated tau^2 value): 0.3922
## I^2 (total heterogeneity / total variability): 19.17%
## H^2 (total variability / sampling variability): 1.24
##
## Test for Heterogeneity:
## Q(df = 5) = 6.1442, p-val = 0.2924
##
## Model Results:
##
## estimate se zval pval ci.lb ci.ub
## 1.9743 0.3662 5.3907 <.0001 1.2565 2.6921 ***
##
## ---
## Signif. codes: 0 '***' 0.001 '**' 0.01 '*' 0.05 '.' 0.1 ' ' 1
```

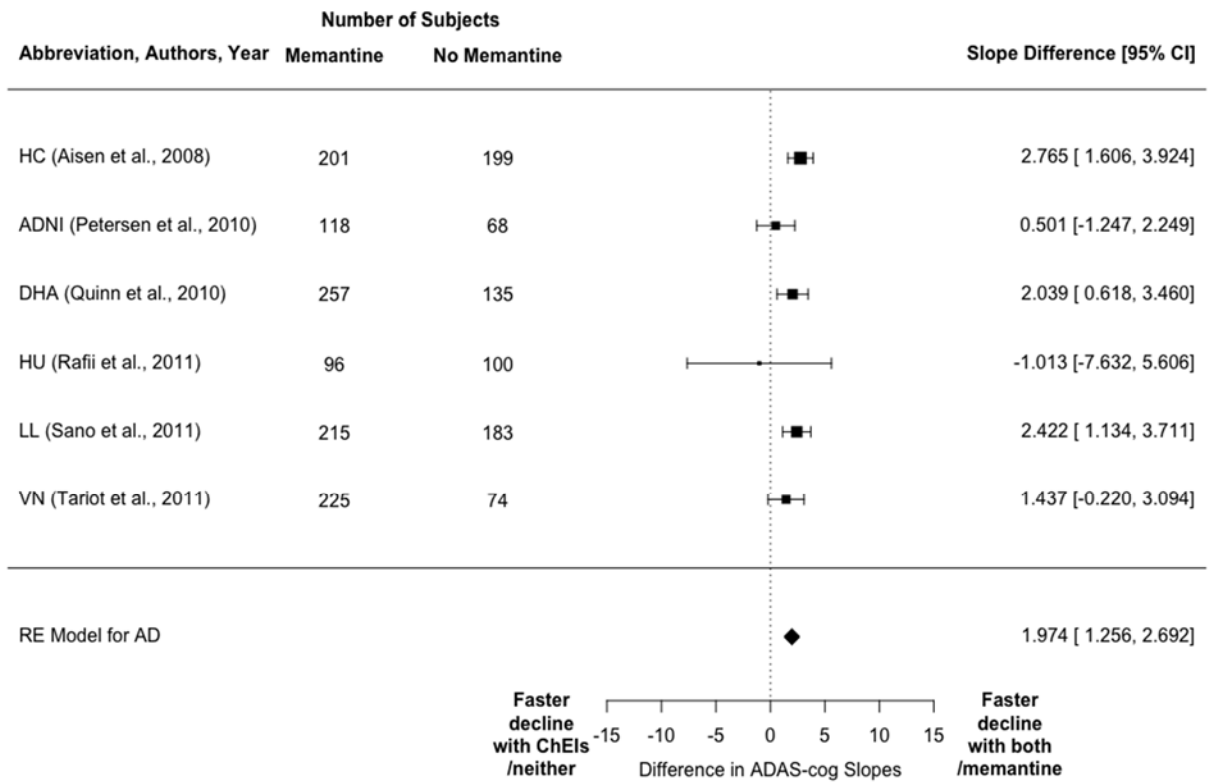



## Rates of decline for memantine (+/- ChEIs) vs. ChEIs only, with moderator of study year

### Mixed Models

```
## Study Name
## [1] "ADNI"
## Full Mixed Effects Model
## Linear mixed model fit by maximum likelihood ['lmerMod']
## Formula: ADAS ~ AGE + EDUCATION + group + month + group:month + (month |
##   UID)
## Data: mixed.data
##
##   AIC   BIC logLik deviance df.resid
## 3825.8 3869.9 -1902.9 3805.8   597
##
## Scaled residuals:
##   Min     1Q   Median     3Q      Max
## -2.26251 -0.45376 -0.02347  0.41798  2.59506
##
## Random effects:
## Groups Name      Variance Std.Dev. Corr
## UID   (Intercept) 30.34   5.508
##      month      20.24   4.498  0.48
## Residual          10.79   3.284
## Number of obs: 607, groups: UID, 173
##
## Fixed effects:
##           Estimate Std. Error t value
## (Intercept) 13.43112   5.21594  2.575
## AGE          0.06334   0.06045  1.048
## EDUCATION   -0.04356   0.15123 -0.288
## group1      1.50850   1.00789  1.497
## month       4.72455   0.73490  6.429
## group1:month 0.50066   0.89188  0.561
##
## Correlation of Fixed Effects:
##      (Intr) AGE  EDUCAT group1 month
## AGE          -0.900
## EDUCATION   -0.426  0.019
## group1      -0.202  0.162 -0.155
## month        0.021  0.008 -0.002 -0.141
## group1:mnth -0.013 -0.009 -0.005  0.182 -0.824
## P Value for Full vs. Reduced Model
## [1] 0.5752262
```

### ADNI



```
## Study Name
## [1] "DHA"
## Full Mixed Effects Model
## Linear mixed model fit by maximum likelihood ['lmerMod']
## Formula: ADAS ~ AGE + EDUCATION + group + month + group:month + (month |
##   UID)
## Data: mixed.data
##
##   AIC   BIC logLik deviance df.resid
## 7545.2 7595.9 -3762.6 7525.2   1170
##
## Scaled residuals:
##   Min     1Q  Median     3Q    Max
## -2.61384 -0.47988  0.00245  0.47883  2.57241
##
## Random effects:
## Groups Name      Variance Std.Dev. Corr
## UID   (Intercept) 57.56   7.587
##      month      22.30   4.722  0.57
## Residual          10.91   3.302
```



```

## Number of obs: 1180, groups: UID, 353
##
## Fixed effects:
##      Estimate Std. Error t value
## (Intercept) 15.4286   4.7024  3.281
## AGE          0.1166   0.0496  2.350
## EDUCATION   -0.2601   0.1509 -1.723
## group1       4.9019   0.9590  5.111
## month        3.9729   0.6114  6.498
## group1:month 2.0387   0.7250  2.812
##
## Correlation of Fixed Effects:
##      (Intr) AGE  EDUCAT group1 month
## AGE          -0.881
## EDUCATION    -0.579  0.163
## group1       -0.151  0.048 -0.071
## month         0.054 -0.011  0.000 -0.223
## group1:mnth -0.036  0.003 -0.009  0.260 -0.843
## P Value for Full vs. Reduced Model
## [1] 0.005062576

```

**DHA**



```

## Study Name
## [1] "HC"
## Full Mixed Effects Model
## Linear mixed model fit by maximum likelihood ['lmerMod']
## Formula: ADAS ~ AGE + EDUCATION + group + month + group:month + (month |
##   UID)
## Data: mixed.data
##
##   AIC   BIC logLik deviance df.resid
## 8260.1 8311.6 -4120.0 8240.1   1273
##
## Scaled residuals:
##   Min     1Q   Median     3Q      Max
## -3.1929 -0.5029 -0.0233  0.4700  4.0560
##
## Random effects:
## Groups Name      Variance Std.Dev. Corr
## UID   (Intercept) 54.89   7.409
##      month      16.41   4.051  0.42
## Residual      13.12   3.622
## Number of obs: 1283, groups: UID, 361
##
## Fixed effects:
##           Estimate Std. Error t value
## (Intercept) 15.01354   4.88852   3.071
## AGE         0.16131   0.05513   2.926
## EDUCATION  -0.49051   0.14001  -3.503
## group1      4.01666   0.85470   4.699
## month       2.95427   0.43377   6.811
## group1:month 2.76470   0.59132   4.675
##
## Correlation of Fixed Effects:
##      (Intr) AGE  EDUCAT group1 month
## AGE      -0.912
## EDUCATION -0.480  0.101
## group1   -0.138  0.093 -0.086
## month    0.023 -0.009 -0.008 -0.066
## group1:mnth -0.016  0.005  0.010  0.089 -0.734
## P Value for Full vs. Reduced Model
## [1] 4.473328e-06

```

HC



```
## Study Name
## [1] "HU"
## Full Mixed Effects Model
## Linear mixed model fit by maximum likelihood ['lmerMod']
## Formula: ADAS ~ AGE + EDUCATION + group + month + group:month + (month |
##   UID)
## Data: mixed.data
##
##   AIC   BIC logLik deviance df.resid
## 1681.8 1716.9 -830.9 1661.8   236
##
## Scaled residuals:
##   Min     1Q  Median     3Q    Max
## -2.16585 -0.47352 -0.01075  0.48386  2.31685
##
## Random effects:
## Groups Name      Variance Std.Dev. Corr
## UID   (Intercept) 107.423 10.364
##      month        2.608  1.615  0.75
## Residual          15.910  3.989
```

```

## Number of obs: 246, groups: UID, 97
##
## Fixed effects:
##      Estimate Std. Error t value
## (Intercept) 52.9841  15.5889  3.399
## AGE        -0.2617   0.1536 -1.703
## EDUCATION  -0.5873   0.3212 -1.828
## group1      4.7030   7.8414  0.600
## month       2.6606   3.3151  0.803
## group1:month -1.0131   3.3770 -0.300
##
## Correlation of Fixed Effects:
##      (Intr) AGE  EDUCAT group1 month
## AGE        -0.804
## EDUCATION  -0.413  0.107
## group1     -0.532  0.015  0.097
## month       0.006  0.004  0.011 -0.024
## group1:mnth -0.006 -0.004 -0.010  0.024 -0.982
## P Value for Full vs. Reduced Model
## [1] 0.7669275

```



```

## Study Name
## [1] "LL"
## Full Mixed Effects Model
## Linear mixed model fit by maximum likelihood ['lmerMod']
## Formula: ADAS ~ AGE + EDUCATION + group + month + group:month + (month |
##   UID)
## Data: mixed.data
##
##   AIC   BIC logLik deviance df.resid
## 8060.9 8111.9 -4020.4 8040.9   1209
##
## Scaled residuals:
##   Min     1Q  Median     3Q      Max
## -2.45904 -0.48528 -0.00988  0.45778  2.97316
##
## Random effects:
## Groups Name      Variance Std.Dev. Corr
## UID   (Intercept) 82.58   9.087
##      month      18.82   4.339  0.34
## Residual      13.63   3.692
## Number of obs: 1219, groups: UID, 373
##
## Fixed effects:
##           Estimate Std. Error t value
## (Intercept) 20.488283  4.829999  4.242
## AGE          0.006948  0.054431  0.128
## EDUCATION    0.010258  0.159901  0.064
## group1       5.056426  1.026693  4.925
## month        3.977156  0.500995  7.939
## group1:month 2.422437  0.657554  3.684
##
## Correlation of Fixed Effects:
##      (Intr) AGE  EDUCAT group1 month
## AGE      -0.878
## EDUCATION -0.505  0.060
## group1   -0.144  0.123 -0.160
## month     0.014 -0.001 -0.006 -0.049
## group1:mnth -0.010  0.000  0.005  0.066 -0.762
## P Value for Full vs. Reduced Model
## [1] 0.000262101

```

LL



```
## Study Name
## [1] "VN"
## Full Mixed Effects Model
## Linear mixed model fit by maximum likelihood ['lmerMod']
## Formula: ADAS ~ AGE + EDUCATION + group + month + group:month + (month |
##   UID)
## Data: mixed.data
##
##   AIC   BIC logLik deviance df.resid
## 5633.5 5681.0 -2806.8 5613.5    840
##
## Scaled residuals:
##   Min     1Q  Median     3Q    Max
## -2.9715 -0.4960 -0.0157  0.4295  3.9849
##
## Random effects:
## Groups Name      Variance Std.Dev. Corr
## UID   (Intercept) 63.44   7.965
##      month      13.59   3.686  0.32
## Residual          16.11   4.014
```

```

## Number of obs: 850, groups: UID, 275
##
## Fixed effects:
##      Estimate Std. Error t value
## (Intercept) 35.33160  5.90774  5.981
## AGE        -0.09639  0.06730 -1.432
## EDUCATION  -0.09911  0.15953 -0.621
## group1     3.32177  1.25067  2.656
## month      5.06683  0.72732  6.966
## group1:month 1.43710  0.84547  1.700
##
## Correlation of Fixed Effects:
##      (Intr) AGE  EDUCAT group1 month
## AGE      -0.922
## EDUCATION -0.433  0.098
## group1   -0.234  0.149 -0.146
## month    0.002  0.002 -0.003 -0.010
## group1:mnth -0.002 -0.002  0.006  0.009 -0.860
## P Value for Full vs. Reduced Model
## [1] 0.0932488

```



```

##
## Mixed-Effects Model (k = 6; tau^2 estimator: REML)
##
## tau^2 (estimated amount of residual heterogeneity): 0.2143 (SE = 0.6541)
## tau (square root of estimated tau^2 value): 0.4629
## I^2 (residual heterogeneity / unaccounted variability): 21.80%
## H^2 (unaccounted variability / sampling variability): 1.28
## R^2 (amount of heterogeneity accounted for): 0.00%
##
## Test for Residual Heterogeneity:
## QE(df = 4) = 4.8477, p-val = 0.3033
##
## Test of Moderators (coefficient(s) 2):
## QM(df = 1) = 0.9030, p-val = 0.3420
##
## Model Results:
##
## estimate se zval pval ci.lb ci.ub
## intcpt 5.8868 4.1525 1.4177 0.1563 -2.2518 14.0255
## mods -0.3051 0.3211 -0.9503 0.3420 -0.9344 0.3242
##
## ---
## Signif. codes: 0 '***' 0.001 '**' 0.01 '*' 0.05 '.' 0.1 ' ' 1

```



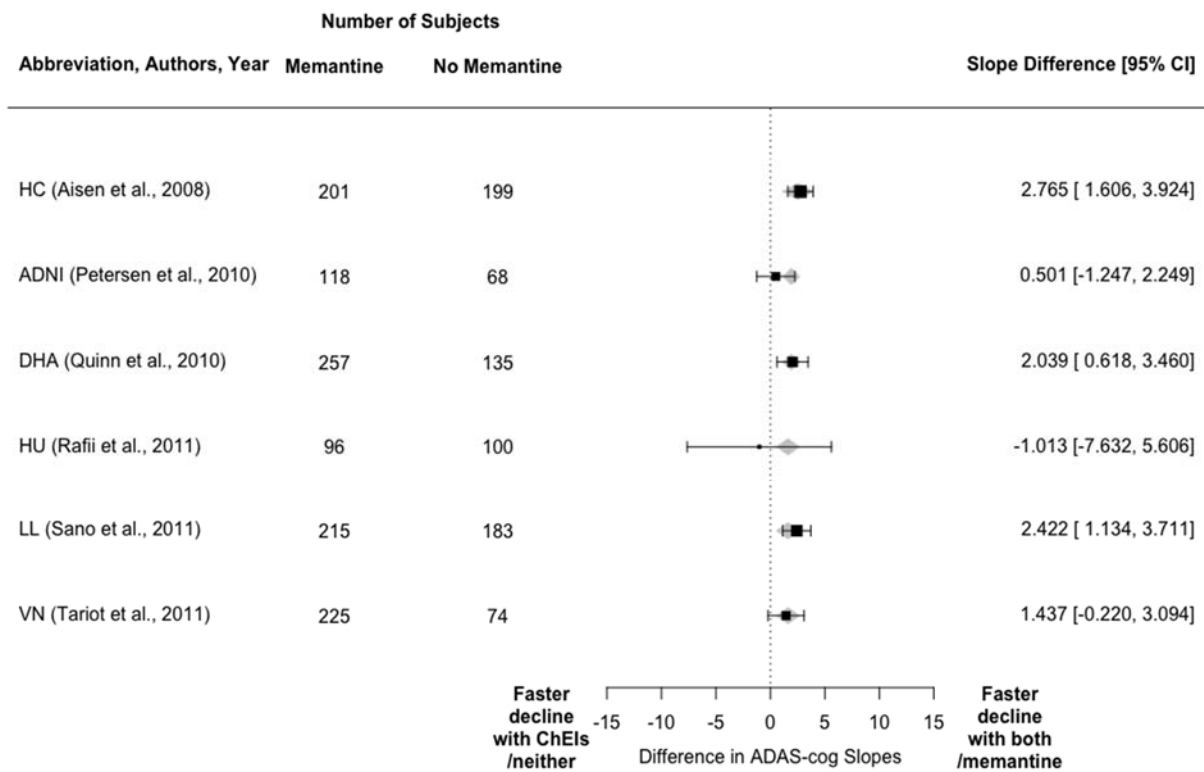



**Rates of decline for memantine (+/- ChEIs) vs. ChEIs only, with moderator of % taking meds**

```
## Study Name
## [1] "ADNI"
## Full Mixed Effects Model
## Linear mixed model fit by maximum likelihood ['lmerMod']
## Formula: ADAS ~ AGE + EDUCATION + group + month + group:month + (month |
##   UID)
## Data: mixed.data
##
##   AIC   BIC logLik deviance df.resid
## 3825.8 3869.9 -1902.9 3805.8   597
##
## Scaled residuals:
##   Min     1Q  Median     3Q    Max
## -2.26251 -0.45376 -0.02347  0.41798  2.59506
##
## Random effects:
## Groups Name      Variance Std.Dev. Corr
## UID   (Intercept) 30.34   5.508
##      month       20.24   4.498   0.48
## Residual          10.79   3.284
## Number of obs: 607, groups: UID, 173
##
## Fixed effects:
##           Estimate Std. Error t value
## (Intercept) 13.43112   5.21594   2.575
## AGE         0.06334   0.06045   1.048
## EDUCATION  -0.04356   0.15123  -0.288
## group1      1.50850   1.00789   1.497
## month       4.72455   0.73490   6.429
## group1:month 0.50066   0.89188   0.561
##
## Correlation of Fixed Effects:
##      (Intr) AGE  EDUCAT group1 month
## AGE      -0.900
## EDUCATION -0.426  0.019
## group1   -0.202  0.162 -0.155
## month    0.021  0.008 -0.002 -0.141
## group1:mnth -0.013 -0.009 -0.005  0.182 -0.824
## P Value for Full vs. Reduced Model
## [1] 0.5752262
```

### ADNI



```
## Study Name
## [1] "DHA"
## Full Mixed Effects Model
## Linear mixed model fit by maximum likelihood ['lmerMod']
## Formula: ADAS ~ AGE + EDUCATION + group + month + group:month + (month |
##   UID)
## Data: mixed.data
##
##   AIC   BIC logLik deviance df.resid
## 7545.2 7595.9 -3762.6 7525.2   1170
##
## Scaled residuals:
##   Min     1Q  Median     3Q    Max
## -2.61384 -0.47988  0.00245  0.47883  2.57241
##
## Random effects:
## Groups Name      Variance Std.Dev. Corr
## UID   (Intercept) 57.56   7.587
##      month       22.30   4.722  0.57
## Residual          10.91   3.302
```

```

## Number of obs: 1180, groups: UID, 353
##
## Fixed effects:
##      Estimate Std. Error t value
## (Intercept) 15.4286  4.7024  3.281
## AGE          0.1166  0.0496  2.350
## EDUCATION   -0.2601  0.1509 -1.723
## group1       4.9019  0.9590  5.111
## month        3.9729  0.6114  6.498
## group1:month 2.0387  0.7250  2.812
##
## Correlation of Fixed Effects:
##      (Intr) AGE  EDUCAT group1 month
## AGE          -0.881
## EDUCATION    -0.579  0.163
## group1       -0.151  0.048 -0.071
## month         0.054 -0.011  0.000 -0.223
## group1:mnth -0.036  0.003 -0.009  0.260 -0.843
## P Value for Full vs. Reduced Model
## [1] 0.005062576

```

**DHA**



```

## Study Name
## [1] "HC"
## Full Mixed Effects Model
## Linear mixed model fit by maximum likelihood ['lmerMod']
## Formula: ADAS ~ AGE + EDUCATION + group + month + group:month + (month |
##   UID)
## Data: mixed.data
##
##   AIC   BIC logLik deviance df.resid
## 8260.1 8311.6 -4120.0 8240.1   1273
##
## Scaled residuals:
##   Min     1Q   Median     3Q      Max
## -3.1929 -0.5029 -0.0233  0.4700  4.0560
##
## Random effects:
## Groups Name      Variance Std.Dev. Corr
## UID   (Intercept) 54.89   7.409
##      month      16.41   4.051  0.42
## Residual      13.12   3.622
## Number of obs: 1283, groups: UID, 361
##
## Fixed effects:
##           Estimate Std. Error t value
## (Intercept) 15.01354   4.88852   3.071
## AGE         0.16131   0.05513   2.926
## EDUCATION  -0.49051   0.14001  -3.503
## group1      4.01666   0.85470   4.699
## month       2.95427   0.43377   6.811
## group1:month 2.76470   0.59132   4.675
##
## Correlation of Fixed Effects:
##      (Intr) AGE  EDUCAT group1 month
## AGE      -0.912
## EDUCATION -0.480  0.101
## group1   -0.138  0.093 -0.086
## month    0.023 -0.009 -0.008 -0.066
## group1:mnth -0.016  0.005  0.010  0.089 -0.734
## P Value for Full vs. Reduced Model
## [1] 4.473328e-06

```

HC



```
## Study Name
## [1] "HU"
## Full Mixed Effects Model
## Linear mixed model fit by maximum likelihood ['lmerMod']
## Formula: ADAS ~ AGE + EDUCATION + group + month + group:month + (month |
##   UID)
## Data: mixed.data
##
##   AIC   BIC logLik deviance df.resid
## 1681.8 1716.9 -830.9 1661.8   236
##
## Scaled residuals:
##   Min     1Q  Median     3Q      Max
## -2.16585 -0.47352 -0.01075  0.48386  2.31685
##
## Random effects:
## Groups Name      Variance Std.Dev. Corr
## UID   (Intercept) 107.423 10.364
##      month        2.608  1.615  0.75
## Residual          15.910  3.989
```

```

## Number of obs: 246, groups: UID, 97
##
## Fixed effects:
##      Estimate Std. Error t value
## (Intercept) 52.9841  15.5889  3.399
## AGE        -0.2617   0.1536 -1.703
## EDUCATION  -0.5873   0.3212 -1.828
## group1      4.7030   7.8414  0.600
## month       2.6606   3.3151  0.803
## group1:month -1.0131   3.3770 -0.300
##
## Correlation of Fixed Effects:
##      (Intr) AGE  EDUCAT group1 month
## AGE          -0.804
## EDUCATION    -0.413  0.107
## group1       -0.532  0.015  0.097
## month        0.006  0.004  0.011 -0.024
## group1:mnth -0.006 -0.004 -0.010  0.024 -0.982
## P Value for Full vs. Reduced Model
## [1] 0.7669275

```





```

## Study Name
## [1] "LL"
## Full Mixed Effects Model
## Linear mixed model fit by maximum likelihood ['lmerMod']
## Formula: ADAS ~ AGE + EDUCATION + group + month + group:month + (month |
##   UID)
## Data: mixed.data
##
##   AIC   BIC logLik deviance df.resid
## 8060.9 8111.9 -4020.4 8040.9   1209
##
## Scaled residuals:
##   Min     1Q  Median     3Q      Max
## -2.45904 -0.48528 -0.00988  0.45778  2.97316
##
## Random effects:
## Groups Name      Variance Std.Dev. Corr
## UID   (Intercept) 82.58   9.087
##   month      18.82   4.339   0.34
## Residual      13.63   3.692
## Number of obs: 1219, groups: UID, 373
##
## Fixed effects:
##           Estimate Std. Error t value
## (Intercept) 20.488283  4.829999  4.242
## AGE          0.006948  0.054431  0.128
## EDUCATION    0.010258  0.159901  0.064
## group1       5.056426  1.026693  4.925
## month        3.977156  0.500995  7.939
## group1:month 2.422437  0.657554  3.684
##
## Correlation of Fixed Effects:
##      (Intr) AGE  EDUCAT group1 month
## AGE      -0.878
## EDUCATION -0.505  0.060
## group1   -0.144  0.123 -0.160
## month    0.014 -0.001 -0.006 -0.049
## group1:mnth -0.010  0.000  0.005  0.066 -0.762
## P Value for Full vs. Reduced Model
## [1] 0.000262101

```

LL



```
## Study Name
## [1] "VN"
## Full Mixed Effects Model
## Linear mixed model fit by maximum likelihood ['lmerMod']
## Formula: ADAS ~ AGE + EDUCATION + group + month + group:month + (month |
##   UID)
## Data: mixed.data
##
##   AIC   BIC logLik deviance df.resid
## 5633.5 5681.0 -2806.8 5613.5    840
##
## Scaled residuals:
##   Min     1Q  Median     3Q    Max
## -2.9715 -0.4960 -0.0157  0.4295  3.9849
##
## Random effects:
## Groups Name      Variance Std.Dev. Corr
## UID   (Intercept) 63.44   7.965
##      month      13.59   3.686  0.32
## Residual          16.11   4.014
```

```

## Number of obs: 850, groups: UID, 275
##
## Fixed effects:
##      Estimate Std. Error t value
## (Intercept) 35.33160  5.90774  5.981
## AGE        -0.09639  0.06730 -1.432
## EDUCATION  -0.09911  0.15953 -0.621
## group1      3.32177  1.25067  2.656
## month       5.06683  0.72732  6.966
## group1:month 1.43710  0.84547  1.700
##
## Correlation of Fixed Effects:
##      (Intr) AGE  EDUCAT group1 month
## AGE        -0.922
## EDUCATION  -0.433  0.098
## group1     -0.234  0.149 -0.146
## month       0.002  0.002 -0.003 -0.010
## group1:mnth -0.002 -0.002  0.006  0.009 -0.860
## P Value for Full vs. Reduced Model
## [1] 0.0932488

```



```

##
## Mixed-Effects Model (k = 6; tau^2 estimator: REML)
##
## tau^2 (estimated amount of residual heterogeneity): 0.0000 (SE = 0.4241)
## tau (square root of estimated tau^2 value): 0.0008
## I^2 (residual heterogeneity / unaccounted variability): 0.00%
## H^2 (unaccounted variability / sampling variability): 1.00
## R^2 (amount of heterogeneity accounted for): 100.00%
##
## Test for Residual Heterogeneity:
## QE(df = 4) = 3.5783, p-val = 0.4661
##
## Test of Moderators (coefficient(s) 2):
## QM(df = 1) = 2.5658, p-val = 0.1092
##
## Model Results:
##
## estimate se zval pval ci.lb ci.ub
## intrcpt 5.4700 2.1707 2.5199 0.0117 1.2155 9.7245 *
## mods -0.0585 0.0365 -1.6018 0.1092 -0.1300 0.0131
##
## ---
## Signif. codes: 0 '***' 0.001 '**' 0.01 '*' 0.05 '.' 0.1 ' ' 1

```

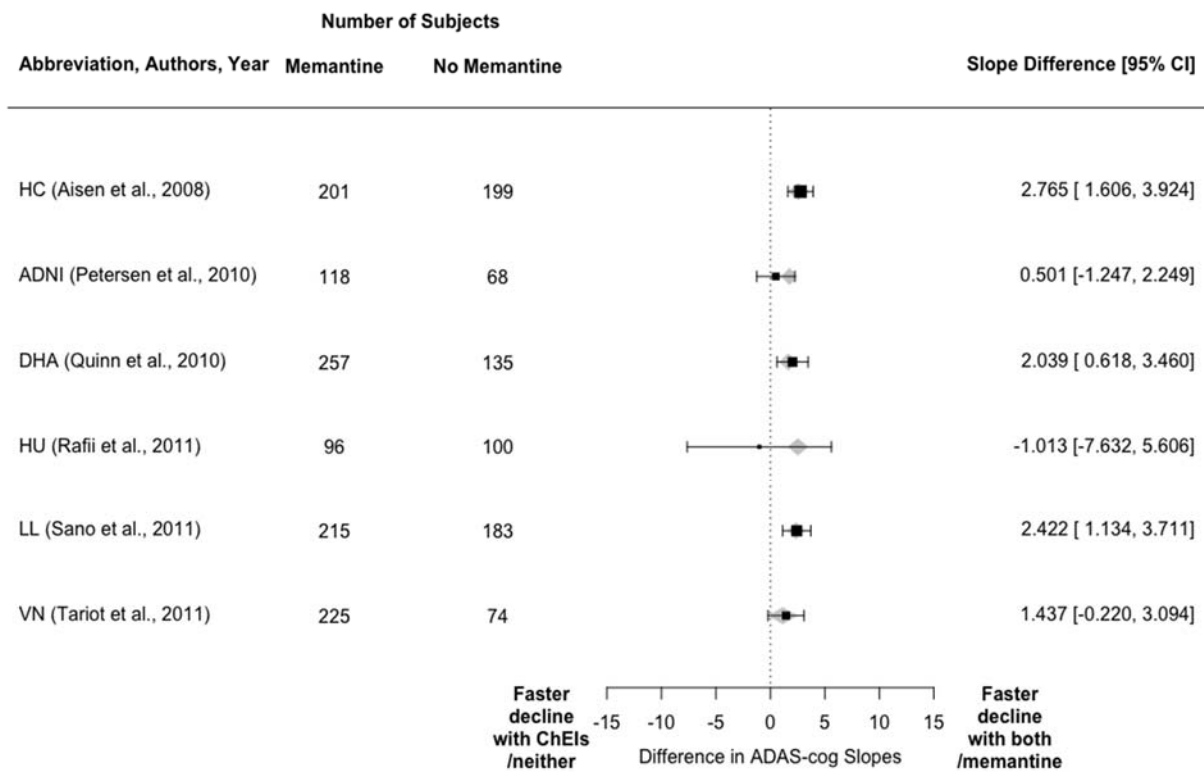

## Source Code

```
library(knitr)
opts_chunk$set(fig.path = 'figure/', message=FALSE, warning=FALSE, dev=c('png','post
script'), fig.width=11, fig.height=8.5)
library(knitcitations); cleanbib()
cite_options(citation_format = "pandoc", check.entries=FALSE)
library(bibtex)
# load libraries required for analysis
library(compareGroups)
library(car)
library(metafor)
library(lme4)
library(EMAtools)
library(calibrate)
library(Hmisc)

cohensd.ci <- function(d, n1, n2, ci = 0.95) {
  library(compute.es)
  t <- d * sqrt((n1 * n2)/(n1 + n2))
  capture.output(
    fit <- compute.es::tes(t = t, n.1 = n1, n.2 = n2, level = 100 * ci),
    file = "NUL"
  )
  c(lower.ci = fit$l.d, upper.ci = fit$u.d)
}

setwd("/Users/richardkennedy/Documents/ADCS")
adasna.strings=c('-4.0','-1.0'," '-1','-2','-3', '-4','-5','NA',")

study.names <- c("ADNI", "AP", "DHA", "EIN", "ES", "HC", "HU", "LL", "MCI", "ML
", "NL", "NS", "PI", "PIWEB", "PR", "SIN", "SL", "VN", "VP")
study.authors <- c("Petersen et al.", "Teri et al.", "Quinn et al.", "Ferris et al.", "Mulnard
et al.", "Aisen et al.", "Raffi et al.", "Sano et al.", "Petersen et al.", "Singer et al.", "Normal
Controls", "Aisen et al.", "Ferris et al.", "Walsh et al.", "Aisen et al.", "Sano et al.", "Sano
et al.", "Tariot et al.", "Tariot et al.")
study.refno <- c("2", "", "15", "", "12", "14", "16", "17", "", "", "", "13", "", "", "11", "", "
10", "18", "")
names(study.authors) <- study.names
names(study.refno) <- study.names
# by year of publication
#study.years <- c("2010", "2000", "2010", "1997", "2000", "2008", "2011", "2011", "200
5", "2003", "in progress", "2003", "2006", "2006", "2000", "1997a", "1997", "2011", "20
05")
# by year of enrollment
study.years <- c("2005", "1994", "2006", "1993", "1995", "2003", "2004", "2003", "1999
", "1997", "1999", "1999", "2002", "2002", "1995", "1993", "1993", "2003", "2000")
```

```

names(study.years) <- study.names
study.pubyears <- c(2010, 2000, 2010, 1997, 2000, 2008, 2011, 2011, 2005, 2003, 2016,
2003, 2006, 2006, 2000, 1997, 1997, 2011, 2005)
names(study.pubyears) <- study.names
study.relyears <- study.pubyears - min(study.pubyears)
names(study.relyears) <- study.names

codes <- c("sc", "bl", "m01", "m02", "m03", "m06", "m09", "m12", "m15", "m18", "m20",
", "m21", "m24", "m30", "m36", "m48", "sc", "w04", "w06", "w08", "w11", "w12", "w16",
", "w20", "w24", "w28", "w36", "w44", "w48", "w52", "w60", "w68", "w72")
new.codes <- c("sc", "bl", "m01", "m02", "m03", "m06", "m09", "m12", "m15", "m18", "m20",
", "m21", "m24", "m30", "m36", "m48", "sc", "m01", "m01", "m02", "m03", "m03",
", "m04", "m05", "m06", "m06", "m09", "m11", "m12", "m12", "m15", "m18", "m18")
months <- c(0, 0, 1, 2, 3, 6, 9, 12, 15, 18, 20, 21, 24, 30, 36, 48, 0, 1, 2, 2, 3, 3, 4, 5, 6, 7,
9, 11, 12, 12, 15, 17, 18)
names(months) <- codes
placebo.codes <- c("1", "2", "3", "4", "5", "6", "7", "8", "9", "Behavior", "Clinic", "Home",
", "Placebo", "Web")

drug.codes <- c("0.625mg", "1.25mg", "Active", "Alpha-Tocopherol", "DHA", "Donepezil",
", "Haloperidol", "HU200ug", "HU400ug", "ML 10", "ML 2.5SR", "Naproxen", "PR",
", "Rofecoxib", "Selegiline", "Selegiline_and_Alpha-Tocopherol", "Trazodone", "Valproate",
", "Vitamin B", "Vitamin E")

drug.studies <- c("SL", "AP", "PR", "ES", "ML", "MCI", "NS", "VP", "LL", "HC", "VN",
", "HU", "AX", "DHA")

adas.studies <- c("DHA", "ES", "HC", "HU", "LL", "MCI", "ML", "NL", "NS", "PR", "SL",
", "VN", "ADNI")

adas.ad.studies <- c("DHA", "ES", "HC", "HU", "LL", "ML", "NS", "PR", "SL", "VN", "ADNI")

chei.studies <- c("DHA", "ES", "HC", "HU", "LL", "ML", "NS", "PR", "SL", "VN", "ADNI")

memantine.studies <- c("DHA", "HC", "HU", "LL", "VN", "ADNI")

adasscores <- read.table(file="adcs-adasscores-data-2013-09-24.csv", sep=",", header=TRUE,
stringsAsFactors=FALSE, na.strings=adasna.strings)
demog <- read.table(file="adcs-demog-data-2012-06-12.csv", sep=",", header=TRUE, stringsAsFactors=TRUE,
na.strings=adasna.strings)
arm <- read.table(file="adcs-arm-data-2012-05-30.csv", sep=",", header=TRUE, stringsAsFactors=FALSE,
na.strings=adasna.strings)
cdr <- read.table(file="adcs-cdr-data-2012-06-11.csv", sep=",", header=TRUE, stringsAsFactors=FALSE,
na.strings=adasna.strings)

```

```

setwd("/Users/richardkennedy/Documents/Schneider/ChEI")
# medications
medhist <- read.csv("adcs-conmeds-data-revised-2012-11-21modified.csv", na.strings="-
1", stringsAsFactors=FALSE, allowEscapes=TRUE)
temp <- ifelse(medhist$CMMED=="", medhist$GNAME, medhist$CMMED)
temp <- toupper(temp)
temp <- replace(temp, temp=="ARICEFT", "DONEPEZIL")
temp <- replace(temp, temp=="ARICET", "DONEPEZIL")
temp <- replace(temp, temp=="ARICIEPT", "DONEPEZIL")
temp <- replace(temp, temp=="ARICIPT", "DONEPEZIL")
temp <- replace(temp, temp=="ARICPET", "DONEPEZIL")
temp <- replace(temp, temp=="ARICEPT", "DONEPEZIL")
temp <- replace(temp, temp=="ARICEPT (DONEPEZIL)", "DONEPEZIL")
temp <- replace(temp, temp=="ARICEPT 10", "DONEPEZIL")
temp <- replace(temp, temp=="ARICEPT 10MG", "DONEPEZIL")
temp <- replace(temp, temp=="ARICEPT 5MG", "DONEPEZIL")
temp <- replace(temp, temp=="DONEPEZIL", "DONEPEZIL")
temp <- replace(temp, temp=="DONEPEZIL (ARICEPT)", "DONEPEZIL")
temp <- replace(temp, temp=="DONEPEZIL HCL", "DONEPEZIL")
temp <- replace(temp, temp=="DONEPEZIL (DONEPEZIL)", "DONEPEZIL")
temp <- replace(temp, temp=="DONEPEZIL 10", "DONEPEZIL")
temp <- replace(temp, temp=="DONEPEZIL 10MG", "DONEPEZIL")
temp <- replace(temp, temp=="DONEPEZIL 5MG", "DONEPEZIL")
temp <- replace(temp, temp=="DONEPEZIL HCL", "DONEPEZIL")
temp <- replace(temp, temp=="DONEPEZIL", "DONEPEZIL")
temp <- replace(temp, temp=="DONEPEZIL (DONEPZIL)", "DONEPEZIL")
temp <- replace(temp, temp=="DONEPEZIL HCl", "DONEPEZIL")
temp <- replace(temp, temp=="DONEPEZIL HCl (DONEPZIL)", "DONEPEZIL")
temp <- replace(temp, temp=="DONEPEZIL HCL", "DONEPEZIL")
temp <- replace(temp, temp=="DONEPEZIL HCL (DONEPZIL)", "DONEPEZIL")
temp <- replace(temp, temp=="DONEPEZIL HYDROCHLORIDE", "DONEPEZIL")
temp <- replace(temp, temp=="DONEPEZL HCL", "DONEPEZIL")
temp <- replace(temp, temp=="DONEPIZIL", "DONEPEZIL")
temp <- replace(temp, temp=="DONEPIZIL HCL", "DONEPEZIL")
temp <- replace(temp, temp=="DONEPZIL", "DONEPEZIL")
temp <- replace(temp, temp=="DONEPZIL (DONEPEZIL)", "DONEPEZIL")
temp <- replace(temp, temp=="DONEPZIL 10", "DONEPEZIL")
temp <- replace(temp, temp=="DONEPZIL 10MG", "DONEPEZIL")
temp <- replace(temp, temp=="DONEPZIL 5MG", "DONEPEZIL")
temp <- replace(temp, temp=="DONEZEPIL", "DONEPEZIL")
temp <- replace(temp, temp=="DOREPZEIL HCL", "DONEPEZIL")
temp <- replace(temp, temp=="E2020", "TACRINE")
temp <- replace(temp, temp=="EXELON", "RIVASTIGMINE")
temp <- replace(temp, temp=="EXELON - TRANSDERMAL PATCH", "RIVASTIGMI
NE")

```



```

temp <- replace(temp, temp=="EXELON (RIVASTIGMINE)", "RIVASTIGMINE")
temp <- replace(temp, temp=="EXELON 10CM2", "RIVASTIGMINE")
temp <- replace(temp, temp=="EXELON 6MG", "RIVASTIGMINE")
temp <- replace(temp, temp=="EXELON PARCH", "RIVASTIGMINE")
temp <- replace(temp, temp=="EXELON PATCH", "RIVASTIGMINE")
temp <- replace(temp, temp=="GALANTAMINE", "GALANTAMINE")
temp <- replace(temp, temp=="GALANTAMINE ER", "GALANTAMINE")
temp <- replace(temp, temp=="GALANTAMINE HYDROBROMIDE", "GALANTAMINE")
temp <- replace(temp, temp=="GALANTAMINE", "GALANTAMINE")
temp <- replace(temp, temp=="GALANTAMINE (GALANTAMINEE)", "GALANTAMINE")
temp <- replace(temp, temp=="GALANTAMINE 8MG", "GALANTAMINE")
temp <- replace(temp, temp=="GALANTAMINE ER", "GALANTAMINE")
temp <- replace(temp, temp=="GALANTAMINE SR", "GALANTAMINE")
temp <- replace(temp, temp=="GALANTAMINEE", "GALANTAMINE")
temp <- replace(temp, temp=="GALANTAMINEE ER", "GALANTAMINE")
temp <- replace(temp, temp=="GALANTAMINEE GALANTAMINE", "GALANTAMINE")
temp <- replace(temp, temp=="GALANTAMINEE SR", "GALANTAMINE")
temp <- replace(temp, temp=="GALANTAMINEE/GALANTAMINE", "GALANTAMINE")
temp <- replace(temp, temp=="GALANTAMINEEL", "GALANTAMINE")
temp <- replace(temp, temp=="MEMANTINE", "MEMANTINE")
temp <- replace(temp, temp=="MEMANTINE", "MEMANTINE")
temp <- replace(temp, temp=="MEMANTINE (NAMENDA)", "MEMANTINE")
temp <- replace(temp, temp=="MEMANTINE HCL", "MEMANTINE")
temp <- replace(temp, temp=="MEMANTINE HCL (NAMENDA)", "MEMANTINE")
temp <- replace(temp, temp=="MEMANTINE HYDROCHLORIDE", "MEMANTINE")
temp <- replace(temp, temp=="MEMATINE", "MEMANTINE")
temp <- replace(temp, temp=="MEMENTINE", "MEMANTINE")
temp <- replace(temp, temp=="MEMONTINE", "MEMANTINE")
temp <- replace(temp, temp=="MENANTINE", "MEMANTINE")
temp <- replace(temp, temp=="MENMANTINE", "MEMANTINE")
temp <- replace(temp, temp=="METRIFONATE", "METRIFONATE")
temp <- replace(temp, temp=="NAMEDA", "MEMANTINE")
temp <- replace(temp, temp=="NAMENDA", "MEMANTINE")
temp <- replace(temp, temp=="NAMENDA (MEMANTINE)", "MEMANTINE")
temp <- replace(temp, temp=="NAMENDA 10", "MEMANTINE")
temp <- replace(temp, temp=="NAMENDA HCL", "MEMANTINE")
temp <- replace(temp, temp=="NAMENDA STARTER KIT", "MEMANTINE")
temp <- replace(temp, temp=="NAMERDA", "MEMANTINE")
temp <- replace(temp, temp=="NEMANDA", "MEMANTINE")
temp <- replace(temp, temp=="NEMENDA", "MEMANTINE")
temp <- replace(temp, temp=="NOMENDA", "MEMANTINE")

```

```

temp <- replace(temp, temp=="PRICEPT", "DONEPEZIL")
temp <- replace(temp, temp=="RAZADINE", "GALANTAMINE")
temp <- replace(temp, temp=="RAZADYN", "GALANTAMINE")
temp <- replace(temp, temp=="RAZADYN ER", "GALANTAMINE")
temp <- replace(temp, temp=="RAZADYNE", "GALANTAMINE")
temp <- replace(temp, temp=="RAZADYNE ER", "GALANTAMINE")
temp <- replace(temp, temp=="RAZADYNE REMINYL", "GALANTAMINE")
temp <- replace(temp, temp=="RAZADYNE SR", "GALANTAMINE")
temp <- replace(temp, temp=="RAZADYNE/REMINYL", "GALANTAMINE")
temp <- replace(temp, temp=="RAZADYNEL", "GALANTAMINE")
temp <- replace(temp, temp=="RAZDYNE", "GALANTAMINE")
temp <- replace(temp, temp=="RAZDYNE SR", "GALANTAMINE")
temp <- replace(temp, temp=="RAZYDYNE", "GALANTAMINE")
temp <- replace(temp, temp=="RAZYDYNE ER", "GALANTAMINE")
temp <- replace(temp, temp=="REMENYL", "GALANTAMINE")
temp <- replace(temp, temp=="REMERYL", "GALANTAMINE")
temp <- replace(temp, temp=="REMINOL", "GALANTAMINE")
temp <- replace(temp, temp=="REMINYL", "GALANTAMINE")
temp <- replace(temp, temp=="REMINYL (RAZADYNE)", "GALANTAMINE")
temp <- replace(temp, temp=="REMINYL 8MG", "GALANTAMINE")
temp <- replace(temp, temp=="REMINYL ER", "GALANTAMINE")
temp <- replace(temp, temp=="RENEDIL", "GALANTAMINE")
temp <- replace(temp, temp=="REVISTAGMINE", "RIVASTIGMINE")
temp <- replace(temp, temp=="REZADYNE", "GALANTAMINE")
temp <- replace(temp, temp=="RIVASTIGINE", "RIVASTIGMINE")
temp <- replace(temp, temp=="RIVASTIGMINE", "RIVASTIGMINE")
temp <- replace(temp, temp=="RIVASTIGMINE", "RIVASTIGMINE")
temp <- replace(temp, temp=="RIVASTIGMINE HYDROGEN TARTRATE", "RIVAS
TIGMINE")
temp <- replace(temp, temp=="ROZADYNE", "GALANTAMINE")
memantine <- ifelse(temp=="MEMANTINE", 1, 0)
memantine <- tapply(memantine, medhist$UID, max)
#idx <- unique(medhist$UID)
memantine <- memantine[medhist$UID]
#memantine <- rep(memantine, times=table(medhist$UID))
medhist$memantine <- memantine
chei <- ifelse(temp=="DONEPEZIL" | temp=="GALANTAMINE" | temp=="RIVASTI
GMINE" | temp=="METRIFONATE" | temp=="TACRINE", 1, 0)
chei <- tapply(chei, medhist$UID, max)
#idx <- sort(unique(medhist$UID))
chei <- chei[medhist$UID]
#chei <- rep(chei, times=table(medhist$UID))
medhist$chei <- chei

donepezil <- ifelse(temp=="DONEPEZIL", 1, 0)
donepezil <- tapply(donepezil, medhist$UID, max)

```

```

donepezil <- donepezil[medhist$UID]
medhist$donepezil <- donepezil

galantamine <- ifelse(temp=="GALANTAMINE", 1, 0)
galantamine <- tapply(galantamine, medhist$UID, max)
galantamine <- galantamine[medhist$UID]
medhist$galantamine <- galantamine

rivastigmine <- ifelse(temp=="RIVASTIGMINE", 1, 0)
rivastigmine <- tapply(rivastigmine, medhist$UID, max)
rivastigmine <- rivastigmine[medhist$UID]
medhist$rivastigmine <- rivastigmine

metrifonate <- ifelse(temp=="METRIFONATE", 1, 0)
metrifonate <- tapply(metrifonate, medhist$UID, max)
metrifonate <- metrifonate[medhist$UID]
medhist$metrifonate <- metrifonate

tacrine <- ifelse(temp=="TACRINE", 1, 0)
tacrine <- tapply(tacrine, medhist$UID, max)
tacrine <- tacrine[medhist$UID]
medhist$tacrine <- tacrine

medhist$group4 <- ifelse(medhist$memantine==1, ifelse(medhist$chei==1, "Both", "Memantine"), ifelse(medhist$chei==1, "ChEI", "Neither"))
medhist$group <- NA
idx <- medhist$group4=="Neither"
idx[is.na(idx)] <- FALSE
medhist$group[idx] <- 0
idx <- medhist$group4=="Both" | medhist$group4=="Memantine" | medhist$group4=="ChEI"
idx[is.na(idx)] <- FALSE
medhist$group[idx] <- 1

all.data <- merge(adasscores, arm, by=c("UID", "METAID", "STUDY", "CENTNO", "RID"), all.x=TRUE, all.y=TRUE, suffixes=c("", ".arm"))
all.data <- merge(all.data, demog, by=c("UID", "METAID", "STUDY", "CENTNO", "RID"), all.x=TRUE, all.y=TRUE, suffixes=c("", ".demog"))

data.cols <- c("UID", "memantine", "chei", "donepezil", "galantamine", "rivastigmine", "metrifonate", "tacrine", "group4", "group")
temp <- medhist[,data.cols]
idx <- !duplicated(temp$UID)
temp <- temp[idx,]
all.data <- merge(all.data, temp, by="UID", all.x=TRUE, all.y=FALSE)

```

```

all.data$TX <- NA
idx <- all.data$ARM %in% placebo.codes
all.data$TX[idx] <- "Placebo"
idx <- all.data$ARM %in% drug.codes
all.data$TX[idx] <- "Drug"

all.data$SEVERITY <- NA

idx <- all.data$ARM=="1" | all.data$ARM=="4" | all.data$ARM=="7" | all.data$STUD
Y=="NL"
all.data$SEVERITY[idx] <- "NL"
idx <- cdr$STUDY=="EIN" & cdr$CDGLOBAL==0 & cdr$VISCODE=="sc"
temp <- unique(cdr[idx,"UID"])
idx <- all.data$UID %in% temp
all.data$SEVERITY[idx] <- "NL"
idx <- cdr$STUDY=="SIN" & cdr$CDGLOBAL==0 & cdr$VISCODE=="sc"
temp <- unique(cdr[idx,"UID"])
idx <- all.data$UID %in% temp
all.data$SEVERITY[idx] <- "NL"
idx <- cdr$STUDY=="PI" & cdr$CDGLOBAL==0 & cdr$VISCODE=="sc"
temp <- unique(cdr[idx,"UID"])
idx <- all.data$UID %in% temp
all.data$SEVERITY[idx] <- "NL"
idx <- cdr$STUDY=="PIWEB" & cdr$CDGLOBAL==0 & cdr$VISCODE=="sc"
temp <- unique(cdr[idx,"UID"])
idx <- all.data$UID %in% temp
all.data$SEVERITY[idx] <- "NL"
idx <- all.data$ARM=="2" | all.data$ARM=="5" | all.data$ARM=="8" | all.data$STUD
Y=="MCI" | all.data$STUDY=="SIN"
all.data$SEVERITY[idx] <- "MCI"
idx <- cdr$STUDY=="PI" & cdr$CDGLOBAL==0.5 & cdr$VISCODE=="sc"
temp <- unique(cdr[idx,"UID"])
idx <- all.data$UID %in% temp
all.data$SEVERITY[idx] <- "MCI"
idx <- cdr$STUDY=="PIWEB" & cdr$CDGLOBAL==0.5 & cdr$VISCODE=="sc"
temp <- unique(cdr[idx,"UID"])
idx <- all.data$UID %in% temp
all.data$SEVERITY[idx] <- "MCI"
idx <- all.data$ARM=="3" | all.data$ARM=="6" | all.data$ARM=="9" | all.data$STUD
Y=="SL" | all.data$STUDY=="AP" | all.data$STUDY=="PR" | all.data$STUDY=="ES"
| all.data$STUDY=="ML" | all.data$STUDY=="NS" | all.data$STUDY=="VP" | all.data
$STUDY=="LL" | all.data$STUDY=="HC" | all.data$STUDY=="VN" | all.data$STUD
Y=="HU" | all.data$STUDY=="AX" | all.data$STUDY=="DHA"
all.data$SEVERITY[idx] <- "AD"
idx <- cdr$STUDY=="EIN" & cdr$CDGLOBAL >= 1 & cdr$VISCODE=="sc"
temp <- unique(cdr[idx,"UID"])

```

```

idx <- all.data$UID %in% temp
all.data$SEVERITY[idx] <- "AD"
idx <- cdr$STUDY=="SIN" & cdr$CDGLOBAL >= 1 & cdr$VISCODE=="sc"
temp <- unique(cdr[idx,"UID"])
idx <- all.data$UID %in% temp
all.data$SEVERITY[idx] <- "AD"

all.data$group1 <- paste(all.data$STUDY, all.data$SEVERITY, sep="-")
all.data$group1 <- as.factor(all.data$group1)
all.data$group2 <- paste(all.data$STUDY, all.data$SEVERITY, all.data$TX, sep="-")
all.data$group2 <- as.factor(all.data$group2)

all.data$MARITAL <- replace(all.data$MARITAL, all.data$MARITAL != 1, 2)
all.data$RACE <- replace(all.data$RACE, all.data$RACE != 5, 2)
all.data$RACE <- replace(all.data$RACE, all.data$RACE == 5, 1)
all.data$ETHNIC <- replace(all.data$ETHNIC, all.data$ETHNIC != 1, 2)

all.data$MONTH <- months[as.character(all.data[, "VISCODE"])]
all.data$MONTH <- as.factor(all.data$MONTH)
#all.data$STUDY <- as.factor(all.data$STUDY)
all.data$EDCAT <- cut(all.data$EDUCATION, c(0, 12, 16, 25), right=FALSE, labels=c(
"Less than High School", "High School graduate", "College graduate"))
all.data$ETHNIC <- factor(all.data$ETHNIC, labels=c("Hispanic", "Not Hispanic"))
all.data$MARITAL <- factor(all.data$MARITAL, labels=c("Married", "Not Married"))
all.data$RACE <- factor(all.data$RACE, labels=c("White", "Nonwhite"))
all.data$SEX <- factor(all.data$SEX, labels=c("Male", "Female"))
all.data$TX <- factor(all.data$TX, levels=c("Placebo", "Drug"))

idx <- is.na(all.data$SEVERITY)
idx[is.na(idx)] <- FALSE
all.data <- all.data[!idx,]

data.cols <- c("UID", "METAID", "STUDY", "CENTNO", "RID", "SITEID", "TOTAL1
1", "VISCODE", "ARM", "AGE", "BIRTHDATE", "EDCAT", "EDUCATION", "ETHN
IC", "EXAMDATE", "MARITAL", "RACE", "SEX", "TX", "SEVERITY", "group", "gr
oup1", "group2", "group4", "donepezil", "galantamine", "rivastigmine", "metrifonate", "ta
crine")
all.data <- all.data[,data.cols]
data.cols <- c("UID", "METAID", "STUDY", "CENTNO", "RID", "SITEID", "ADAS", "
VISCODE", "ARM", "AGE", "BIRTHDATE", "EDCAT", "EDUCATION", "ETHNIC",
"EXAMDATE", "MARITAL", "RACE", "SEX", "TX", "SEVERITY", "group", "group1
", "group2", "group4", "donepezil", "galantamine", "rivastigmine", "metrifonate", "tacrine
")
colnames(all.data) <- data.cols
temp <- all.data$VISCODE
for (i in 1:length(codes)) {

```

```

idx <- temp==codes[i]
temp[idx] <- new.codes[i]
}
all.data$VISCODE <- temp
#study.months <- c("sc", "bl", "m06", "m12", "m18", "m24", "w28", "w52")
study.months <- c("sc", "bl", "m01", "m02", "m03", "m06", "m09", "m11", "m12", "m15",
", "m17", "m18", "m20", "m21", "m24", "m30", "m36", "m48")
#idx <- all.data[, "VISCODE"] %in% study.months
#all.data <- all.data[idx,]
#all.data$VISCODE <- as.factor(all.data$VISCODE)
#print(length(unique(all.data$UID)))

all.data.long <- all.data
temp <- reshape(all.data, v.names="ADAS", timevar="VISCODE", idvar="UID", direction="wide", sep="_")
idx <- is.na(temp$ADAS_sc)
idx[is.na(idx)] <- FALSE
temp$ADAS_sc[idx] <- temp$ADAS_bl[idx]
idx <- is.na(temp$ADAS_bl)
idx[is.na(idx)] <- FALSE
temp$ADAS_bl[idx] <- temp$ADAS_sc[idx]

idx <- c("UID", "METAID", "STUDY", "CENTNO", "RID", "SITEID", "ARM", "AGE",
", "BIRTHDATE", "EDCAT", "EDUCATION", "ETHNIC", "EXAMDATE", "MARITAL", "RACE", "SEX", "TX", "SEVERITY", "group", "group1", "group2", "group4", "donepezil", "galantamine", "rivastigmine", "metrifonate", "tacrine", "ADAS_bl", "ADAS_m06", "ADAS_m12", "ADAS_m18", "ADAS_m24")
temp <- temp[,idx]
all.data <- temp
all.data[, "EDCAT"] <- cut(all.data[, "EDUCATION"], c(0, 12, 16, 25), right=FALSE, labels=c("Less than HS", "HS graduate", "College graduate"))

idx <- all.data$SEVERITY=="AD"
all.ad <- all.data[idx,]
idx <- all.data$SEVERITY=="MCI"
all.mci <- all.data[idx,]
idx <- all.data$SEVERITY=="NL"
all.nl <- all.data[idx,]
idx <- all.data$SEVERITY=="AD"
all.ad <- all.data[idx,]
idx <- !duplicated(all.ad$UID)
all.ad <- all.ad[idx,]
idx <- !is.na(all.ad$STUDY)
all.ad <- all.ad[idx,]
idx <- !is.na(all.ad$ADAS_bl)
all.ad <- all.ad[idx,]

```



```

data.cols <- c("UID", "STUDY", "AGE", "EDUCATION", "ADAS_bl", "ADAS_m06",
"ADAS_m12", "ADAS_m18", "ADAS_m24", "group", "group4")
temp <- reshape(all.ad[,data.cols], idvar = "UID", varying = c("ADAS_bl", "ADAS_m0
6", "ADAS_m12", "ADAS_m18", "ADAS_m24"), direction = "long", sep = "_")
temp$month <- recode(temp$time, "'bl'=0;'m06'=6;'m12'=12;'m18'=18;'m24'=24")

idx <- !is.na(temp$group)
temp <- temp[idx,]

idx <- order(temp$UID, temp$month)
temp <- temp[idx,]

idx <- !is.na(temp$ADAS)
temp <- temp[idx,]

sample.mixed <- temp
results <- NULL
study.ids <- NULL
for (i in unique(sample.mixed$STUDY)) {
  study.name <- i
  writeLines("Study Name")
  print(study.name)
  idx <- sample.mixed$STUDY==study.name
  mixed.data <- sample.mixed[idx,]

  mixed.data$month <- as.numeric(mixed.data$month)
  mixed.data$group <- as.factor(mixed.data$group)
  mixed.data$month <- mixed.data$month / 12
  idx <- order(mixed.data$UID, mixed.data$month)
  mixed.data <- mixed.data[idx,]
  mixed.full <- try(lmer(ADAS ~ AGE + EDUCATION + group + month + group:month
+ (month|UID), REML=FALSE, data=mixed.data))
  mixed.reduced <- try(lmer(ADAS ~ AGE + EDUCATION + group + month + (month|
UID), REML=FALSE, data=mixed.data))

  if ((class(mixed.full) == "try-error") | (class(mixed.reduced) == "try-error")) {
    result <- NA
  } else {
    study.ids <- c(study.ids, as.character(model.frame(mixed.full)$UID))
    mixed.p.val <- anova(mixed.full, mixed.reduced)$"Pr(>Chisq)"[2]
    mixed.int <- fixef(mixed.full)["group1"]
    mixed.slope <- fixef(mixed.full)["group1:month"]

    writeLines("Full Mixed Effects Model")
    print(summary(mixed.full))
    writeLines("P Value for Full vs. Reduced Model")
  }
}

```

```

print(mixed.p.val)
result <- summary(mixed.full)$coefficients["group1:month",1:2]
sample.times <- c(0, 6, 12, 18, 24) /12
med.values <- fixef(mixed.full)["(Intercept)"] + fixef(mixed.full)["group1"] + sample.t
imes * fixef(mixed.full)["month"] + sample.times * fixef(mixed.full)["group1:month"]
nomed.values <- fixef(mixed.full)["(Intercept)"] + sample.times * fixef(mixed.full)["m
onth"]
plot(sample.times, nomed.values, main=study.name, xlab="Time in Years", ylab="Fitt
ed ADAS-cog score", col="black", lty=1, type="l", xaxt="n", ylim=c(0,70))
lines(sample.times, med.values, col="black", lty=2, type="l", xaxt="n")
axis(1, at = sample.times)
}
results <- rbind(results, result)
}
rownames(results) <- unique(sample.mixed$STUDY)
study.ids <- unique(study.ids)
idx <- all.ad$UID %in% study.ids
N <- table(all.ad$STUDY[idx], all.ad$group[idx])
idx <- N[1] != 0
N <- N[idx,]
results <- as.data.frame(results)
results$medN <- N[,2]
results$nomedN <- N[,1]
results$author <- study.authors[rownames(results)]
results$year <- study.pubyears[rownames(results)]
results$refno <- study.refno[rownames(results)]
idx <- order(results$year, results$author)
results <- results[idx,]
meta <- rma(yi=results[,"Estimate"], sei=results[,"Std. Error"], slab=paste(rownames(re
sults), " (", results$author, ", ", results$year, ") [", results$refno, "]", sep=""))
print(meta)
results$severity <- "AD"
all.results <- results
rate.ad <- meta
#pdf("AAICRateForestAD080818.pdf", width=11, height=8.5)
forest(meta, ilab=cbind(results$medN, results$nomedN), ilab.xpos = c(-40, -25), digits=
c(3,0), cex=1.0, xlab="Difference in ADAS-cog Slopes", cex.lab=1, at=c(-15, -10,-5, 0, 5
, 10, 15), xlim=c(-70, 40), mlab="RE Model for AD") #, main="Comparison of Memanti
ne + ChEIs vs. Neither")
op <- par(cex = 1.0, font = 2)
text(-70, 11.5, "Abbreviation, Authors, Year", pos = 4, cex=1.0)
text(40.1, 11.5, "Slope Difference [95% CI]", pos = 2, cex=1.0)
text(c(-40, -25), 11.5, c("AD Meds", "No AD Meds"))
text(-33, 12, "Number of Subjects")
par(op, xpd=TRUE)
text(-21, -2.8, "Faster\ndecline\nwith\nneither")

```





```

s, nmax=TRUE)

temp <- compareGroups(group4 ~ AGE + EDCAT + RACE + ETHNIC + SEX + MAR
ITAL + TX + ADAS_bl + ADAS_m06 + ADAS_m12, data=all.ad, subset=STUDY=="E
S" & UID %in% study.ids)
tab <- createTable(temp, type = 2, hide=c(NA, NA, 2, 2, 1, 2, 2, NA, NA, NA, NA, NA)
, show.n=TRUE)
export2md(tab, caption = "Baseline Characteristics for ES", header.labels=label.names,
nmax=TRUE)

temp <- compareGroups(group4 ~ AGE + EDCAT + RACE + ETHNIC + SEX + MAR
ITAL + TX + ADAS_bl + ADAS_m06 + ADAS_m12 + ADAS_m18, data=all.ad, subset
=STUDY=="HC" & UID %in% study.ids)
tab <- createTable(temp, type = 2, hide=c(NA, NA, 2, 2, 1, 2, 2, NA, NA, NA, NA, NA)
, show.n=TRUE)
export2md(tab, caption = "Baseline Characteristics for HC", header.labels=label.names,
nmax=TRUE)

temp <- compareGroups(group4 ~ AGE + EDCAT + RACE + ETHNIC + SEX + MAR
ITAL + TX + ADAS_bl + ADAS_m06 + ADAS_m12 + ADAS_m18, data=all.ad, subset
=STUDY=="HU" & UID %in% study.ids)
tab <- createTable(temp, type = 2, hide=c(NA, NA, 2, 2, 1, 2, 2, NA, NA, NA, NA, NA)
, show.n=TRUE)
export2md(tab, caption = "Baseline Characteristics for Study HU", header.labels=label.n
ames, nmax=TRUE)

temp <- compareGroups(group4 ~ AGE + EDCAT + RACE + ETHNIC + SEX + MAR
ITAL + TX + ADAS_bl + ADAS_m06 + ADAS_m12 + ADAS_m18, data=all.ad, subset
=STUDY=="LL" & UID %in% study.ids)
tab <- createTable(temp, type = 2, hide=c(NA, NA, 2, 2, 1, 2, 2, NA, NA, NA, NA, NA)
, show.n=TRUE)
export2md(tab, caption = "Baseline Characteristics for LL", header.labels=label.names,
nmax=TRUE)

temp <- compareGroups(group4 ~ AGE + EDCAT + RACE + ETHNIC + SEX + MAR
ITAL + TX + ADAS_bl + ADAS_m06 + ADAS_m12, data=all.ad, subset=STUDY=="N
S" & UID %in% study.ids)
tab <- createTable(temp, type = 2, hide=c(NA, NA, 2, 2, 1, 2, 2, NA, NA, NA, NA, NA)
, show.n=TRUE)
export2md(tab, caption = "Baseline Characteristics for NS", header.labels=label.names,
nmax=TRUE)

temp <- compareGroups(group4 ~ AGE + EDCAT + RACE + ETHNIC + SEX + MAR
ITAL + TX + ADAS_bl + ADAS_m06 + ADAS_m12 + ADAS_m18, data=all.ad, subset
=STUDY=="PR" & UID %in% study.ids)
tab <- createTable(temp, type = 2, hide=c(NA, NA, 2, 2, 1, 2, 2, NA, NA, NA, NA, NA)

```

```

, show.n=TRUE)
export2md(tab, caption = "Baseline Characteristics for PR", header.labels=label.names,
nmax=TRUE)

temp <- compareGroups(group4 ~ AGE + EDCAT + RACE + ETHNIC + SEX + MAR
ITAL + TX + ADAS_bl + ADAS_m06 + ADAS_m12 + ADAS_m18 + ADAS_m24, dat
a=all.ad, subset=STUDY=="SL" & UID %in% study.ids)
tab <- createTable(temp, type = 2, hide=c(NA, NA, 2, 2, 1, 2, 2, NA, NA, NA, NA, NA)
, show.n=TRUE)
export2md(tab, caption = "Baseline Characteristics for SL", header.labels=label.names,
nmax=TRUE)

temp <- compareGroups(group4 ~ AGE + EDCAT + RACE + ETHNIC + SEX + MAR
ITAL + TX + ADAS_bl + ADAS_m06 + ADAS_m12 + ADAS_m18 + ADAS_m24, dat
a=all.ad, subset=STUDY=="VN" & UID %in% study.ids)
tab <- createTable(temp, type = 2, hide=c(NA, NA, 2, 2, 1, 2, 2, NA, NA, NA, NA, NA)
, show.n=TRUE)
export2md(tab, caption = "Baseline Characteristics for VN", header.labels=label.names,
nmax=TRUE)

temp <- compareGroups(group4 ~ AGE + EDCAT + RACE + ETHNIC + SEX + MAR
ITAL + TX + ADAS_bl + ADAS_m06 + ADAS_m12 + ADAS_m24, data=all.ad, subset
=STUDY=="ADNI" & UID %in% study.ids)
tab <- createTable(temp, type = 2, hide=c(NA, NA, 2, 2, 1, 2, 2, NA, NA, NA, NA, NA)
, show.n=TRUE)
export2md(tab, caption = "Baseline Characteristics for ADNI", header.labels=label.names,
nmax=TRUE)
idx <- all.ad$UID %in% study.ids
chei.pct <- tapply(ifelse(all.ad$group4[idx]=="ChEI" | all.ad$group4[idx]=="Both", 1, 0
), all.ad$STUDY[idx], mean, na.rm=TRUE)*100
memantine.pct <- tapply(ifelse(all.ad$group4[idx]=="Memantine" | all.ad$group4[idx]=
=="Both", 1, 0), all.ad$STUDY[idx], mean, na.rm=TRUE)*100

#pdf("ChEIYear080818.pdf", width=11, height=8.5)
plot(study.years[names(chei.pct)], chei.pct, type="p", pch=16, col="blue", xlim=c(1992,
2007), ylim=c(0,100), xlab="Study Year", ylab="Percent of Participants Taking ChEIs")
#, main="Percent Taking ChEI by Publication Year")
textxy(2005, 90.4580152671756, labs="ADNI", cex=1)
textxy(2006, 84.2412451361868, labs="DHA", cex=1)
textxy(1995, 23.6641221374046, labs="ES", cex=1)
textxy(2003, 92.4939467312349-3, labs="HC", cex=1)
textxy(2004, 4.8780487804878, labs="HU", cex=1)
textxy(2003, 93.9903846153846+1, labs="LL", cex=1)
textxy(1999, 83.8068181818182, labs="NS", cex=1)
textxy(1995, 13.9705882352941, labs="PR", cex=1)
textxy(1993, 0.595238095238095+0.1, labs="SL", cex=1)

```

```

textxy(2003, 93.0362116991644-1, labs="VN", cex=1)
text(1993, 80, "Tacrine\nApproved\n1993")
arrows(1993, 75, 1993, 70, length=0.1)
text(1996, 80, "Donepezil\nApproved\n1996")
arrows(1996, 75, 1996, 70, length=0.1)
text(2000, 99, "Rivastigmine\nApproved\n2000")
arrows(2000, 94, 2000, 89, length=0.1)
text(2001, 90, "Galantamine\nApproved\n2001")
arrows(2001, 85, 2001, 80, length=0.1)
#dev.off()
idx <- all.ad$UID %in% study.ids
chei.count <- sum(all.ad$group4[idx]=="ChEI" | all.ad$group4[idx]=="Both")

print(chei.count)

donepezil.total <- sum(all.ad$donepezil[idx], na.rm=TRUE)
galantamine.total <- sum(all.ad$galantamine[idx], na.rm=TRUE)
rivastigmine.total <- sum(all.ad$rivastigmine[idx], na.rm=TRUE)
metrifonate.total <- sum(all.ad$metrifonate[idx], na.rm=TRUE)
tacrine.total <- sum(all.ad$tacrine[idx], na.rm=TRUE)

each.chei.total <- matrix(c(donepezil.total, galantamine.total, rivastigmine.total, metrifonate.total, tacrine.total), ncol=1)
rownames(each.chei.total)=c("donepezil", "galantamine", "rivastigmine", "metrifonate", "tacrine")
print(each.chei.total)

each.chei.pct <- each.chei.total / chei.count * 100
rownames(each.chei.pct)=c("donepezil", "galantamine", "rivastigmine", "metrifonate", "tacrine")
print(each.chei.pct)

each.chei.count <- all.ad$donepezil[idx] + all.ad$galantamine[idx] + all.ad$rivastigmine[idx] + all.ad$metrifonate[idx] + all.ad$tacrine[idx]
each.chei.count <- each.chei.count[each.chei.count != 0]
print(table(each.chei.count))
print(table(each.chei.count) / sum(table(each.chei.count)))

#pdf("EachChEI080818.pdf", width=11, height=8.5)
barplot(t(each.chei.pct), col="darkgreen", ylim=c(0,100), ylab="Percent of Subjects Taking ChEIs", names.arg=c("Donepezil", "Galantamine", "Rivastigmine", "Metrifonate", "Tacrine")) #, main="Rates for Individual ChEIs")
#dev.off()
#pdf("MemantineYear080818.pdf", width=11, height=8.5)
plot(study.years[names(memantine.pct)], memantine.pct, type="p", pch=16, col="red", xlim=c(1993, 2007), ylim=c(0,100), xlab="Study Year", ylab="Percent of Participants Tak

```

```

ing Memantine") #, main="Percent Taking Memantine by Publication Year")
textxy(2005, 57.6335877862595, labs="ADNI", cex=1)
textxy(2006, 64.591439688716, labs="DHA", cex=1)
textxy(1995, 0-0.1, labs="ES", cex=1)
textxy(2003, 50.6053268765133, labs="HC", cex=1)
textxy(2004, 50.2439024390244, labs="HU", cex=1)
textxy(2003, 54.3269230769231, labs="LL", cex=1)
textxy(1999, 0.284090909090909, labs="NS", cex=1)
textxy(1995, 0, labs="PR", cex=1)
textxy(1993, 0-0.1, labs="SL", cex=1)
textxy(2003, 76.3231197771588, labs="VN", cex=1)
text(2003, 1, "Memantine\nApproved\n2003")
arrows(2003, 6, 2003, 11, length=0.1)
#dev.off()
idx <- all.ad$UID %in% study.ids
all.count <- table(all.ad$group4[idx])
print(all.count)
all.pct <- all.count / sum(all.count)*100
print(all.pct)

#pdf("ChEIMemantineYear080818.pdf", width=11, height=8.5)
plot(study.years[names(chai.pct)], chai.pct, type="p", pch=16, col="blue", xlim=c(1993,
2007), ylim=c(0,100), xlab="Study Year", ylab="Percent of Participants Taking ChEIs/M
emantine") #, main="Percent Taking ChEI by Publication Year")
textxy(2005, 90.4580152671756, labs="ADNI", cex=1)
textxy(2006, 84.2412451361868, labs="DHA", cex=1)
textxy(1995, 23.6641221374046, labs="ES", cex=1)
textxy(2003, 92.4939467312349-3, labs="HC", cex=1)
textxy(2004, 4.8780487804878, labs="HU", cex=1)
textxy(2003, 93.9903846153846+1, labs="LL", cex=1)
textxy(1999, 83.8068181818182, labs="NS", cex=1)
textxy(1995, 13.9705882352941, labs="PR", cex=1)
textxy(1993, 0.595238095238095+0.1, labs="SL", cex=1)
textxy(2003, 93.0362116991644-1, labs="VN", cex=1)
points(study.years[names(memantine.pct)], memantine.pct, type="p", pch=16, col="red"
) #, main="Percent Taking Memantine by Publication Year")
textxy(2005, 57.6335877862595, labs="ADNI", cex=1)
textxy(2006, 64.591439688716, labs="DHA", cex=1)
textxy(1995, 0-0.1, labs="ES", cex=1)
textxy(2003, 50.6053268765133, labs="HC", cex=1)
textxy(2004, 50.2439024390244, labs="HU", cex=1)
textxy(2003, 54.3269230769231, labs="LL", cex=1)
textxy(1999, 0.284090909090909, labs="NS", cex=1)
textxy(1995, 0, labs="PR", cex=1)
textxy(1993, 0-0.1, labs="SL", cex=1)
textxy(2003, 76.3231197771588, labs="VN", cex=1)

```

```

text(1993, 80, "Tacrine\nApproved\n1993")
arrows(1993, 75, 1993, 70, length=0.1)
text(1996, 80, "Donepezil\nApproved\n1996")
arrows(1996, 75, 1996, 70, length=0.1)
text(2000, 99, "Rivastigmine\nApproved\n2000")
arrows(2000, 94, 2000, 89, length=0.1)
text(2001, 90, "Galantamine\nApproved\n2001")
arrows(2001, 85, 2001, 80, length=0.1)
text(2003, 1, "Memantine\nApproved\n2003")
arrows(2003, 6, 2003, 11, length=0.1)
legend("topleft", legend=c("ChEIs", "Memantine"), fill=c("blue", "red"))
#dev.off()
temp <- reshape(all.ad[,data.cols], idvar = "UID", varying = c("ADAS_bl", "ADAS_m0
6", "ADAS_m12", "ADAS_m18", "ADAS_m24"), direction = "long", sep="_")
temp$month <- recode(temp$time, "'bl'=0;'m06'=6;'m12'=12;'m18'=18;'m24'=24")

idx <- !is.na(temp$group)
temp <- temp[idx,]

idx <- order(temp$UID, temp$month)
temp <- temp[idx,]

idx <- !is.na(temp$ADAS)
temp <- temp[idx,]

sample.mixed <- temp
results <- NULL
study.ids <- NULL
for (i in c("DHA", "ES", "HC", "HU", "LL", "NS", "PR", "SL", "VN")) {
  study.name <- i
  idx <- sample.mixed$STUDY==study.name
  mixed.data <- sample.mixed[idx,]

  mixed.data$month <- as.numeric(mixed.data$month)
  mixed.data$group <- as.factor(mixed.data$group)
  mixed.data$month <- mixed.data$month / 12
  idx <- order(mixed.data$UID, mixed.data$month)
  mixed.data <- mixed.data[idx,]
  mixed.full <- try(lmer(ADAS ~ AGE + EDUCATION + group + month + group:month
+ (month|UID), REML=FALSE, data=mixed.data))
  mixed.reduced <- try(lmer(ADAS ~ AGE + EDUCATION + group + month + (month|
UID), REML=FALSE, data=mixed.data))

  if ((class(mixed.full) == "try-error") | (class(mixed.reduced) == "try-error")) {
    result <- NA
  } else {

```



```

study.ids <- c(study.ids, as.character(model.frame(mixed.full)$UID))
mixed.p.val <- anova(mixed.full, mixed.reduced)$"Pr(>Chisq)"[2]
mixed.int <- fixef(mixed.full)["group1"]
mixed.slope <- fixef(mixed.full)["group1:month"]

# print(summary(mixed.full))
# print(mixed.p.val)
result <- summary(mixed.full)$coefficients["group1:month",1:2]
sample.times <- c(0, 6, 12, 18, 24) / 12
med.values <- fixef(mixed.full)[ "(Intercept)" ] + fixef(mixed.full)[ "group1" ] + sample.times * fixef(mixed.full)[ "month" ] + sample.times * fixef(mixed.full)[ "group1:month" ]
nomed.values <- fixef(mixed.full)[ "(Intercept)" ] + sample.times * fixef(mixed.full)[ "month" ]
# plot(sample.times, nomed.values, main=study.name, xlab="Time in Years", ylab="Fitted ADAS-cog score", col="black", lty=1, type="l", xaxt="n", ylim=c(0,70))
# lines(sample.times, med.values, col="black", lty=2, type="l", xaxt="n")
# axis(1, at = sample.times)
}
results <- rbind(results, result)
}
rownames(results) <- c("DHA", "ES", "HC", "HU", "LL", "NS", "PR", "SL", "VN")
study.ids <- unique(study.ids)
idx <- all.ad$UID %in% study.ids
N <- table(all.ad$STUDY[idx], all.ad$group[idx])
idx <- N[,1] != 0
N <- N[idx,]
results <- as.data.frame(results)
results$medN <- N[,2]
results$nomedN <- N[,1]
results$author <- study.authors[rownames(results)]
results$year <- study.pubyears[rownames(results)]
idx <- order(results$year, results$author)
results <- results[idx,]
meta <- rma(yi=results[, "Estimate"], sei=results[, "Std. Error"], slab=paste(rownames(results), " (", results$author, ", ", results$year, ")", sep=""))
results$severity <- "AD"
all.results <- results
rate.ad <- meta
#pdf("AAICRateForestNoADNI080818.pdf", width=11, height=8.5)
forest(meta, ilab=cbind(results$medN, results$nomedN), ilab.xpos = c(-40, -25), digits=c(3,0), cex=1.0, xlab="Difference in ADAS-cog Slopes", cex.lab=1, at=c(-15, -10, -5, 0, 5, 10, 15), xlim=c(-70, 40), mlab="RE Model for AD") #, main="Comparison of Memantine + ChEIs vs. Neither")
op <- par(cex = 1.0, font = 2)
text(-70, 11.5, "Abbreviation, Authors, Year", pos = 4, cex=1.0)
text(40.1, 11.5, "Slope Difference [95% CI]", pos = 2, cex=1.0)

```





```

if ((class(mixed.full) == "try-error") | (class(mixed.reduced) == "try-error")) {
  result <- NA
} else {
  study.ids <- c(study.ids, as.character(model.frame(mixed.full)$UID))
  mixed.p.val <- anova(mixed.full, mixed.reduced)$"Pr(>Chisq)"[2]
  mixed.int <- fixef(mixed.full)["group1"]
  mixed.slope <- fixef(mixed.full)["group1:month"]

  dscore <- lme.dscore(mixed.full, data=mixed.data, type="lme4")
  writeLines("Effect Sizes")
  print(dscore)
  d <- dscore["group1:month", "d"]
  idx <- !duplicated(mixed.data$UID)
  N <- table(mixed.data$group[idx])
  ci <- cohensd.ci(d=d, n1=N[1], n2=N[2])
  se <- (ci[2] - ci[1]) / (2 * 1.96)
  result <- data.frame(d, se)
}
results <- rbind(results, result)
}
rownames(results) <- unique(sample.mixed$STUDY)
N <- table(all.ad$STUDY, all.ad$group)
idx <- N[,1] != 0
N <- N[idx,]
results <- as.data.frame(results)
results$medN <- N[,2]
results$nomedN <- N[,1]
results$author <- study.authors[rownames(results)]
results$year <- study.pubyears[rownames(results)]
idx <- order(results$author, results$year)
results <- results[idx,]
meta <- rma(yi=results[, "d"], sei=results[, "se"], slab=paste(rownames(results), " (", results$author, ", ", results$year, ")", sep=""))
print(meta)
all.results <- results
#pdf("AAICRateForestES080818.pdf", width=11, height=8.5)
forest(meta, ilab=cbind(results$medN, results$nomedN), ilab.xpos = c(-40, -25), digits=c(3,1), cex=1.0, xlab="Difference in ADAS-cog Slopes", cex.lab=1, at=c(-2, -1,-0.5, 0, 0.5, 1, 2), xlim=c(-15, 6), mlab="RE Model for AD") #, main="Comparison of Memantine + ChEIs vs. Neither")
op <- par(cex = 1.0, font = 2)
text(-70, 11.5, "Abbreviation, Authors, Year", pos = 4, cex=1.0)
text(40.1, 11.5, "Slope Difference [95% CI]", pos = 2, cex=1.0)
text(c(-40, -25), 11.5, c("AD Meds", "No AD Meds"))
text(-33, 12, "Number of Subjects")
par(op, xpd=TRUE)

```



```

idx <- sample.mixed$STUDY==study.name
mixed.data <- sample.mixed[idx,]

mixed.data$month <- as.numeric(mixed.data$month)
mixed.data$group <- as.factor(mixed.data$group)
mixed.data$month <- mixed.data$month / 12
idx <- order(mixed.data$UID, mixed.data$month)
mixed.data <- mixed.data[idx,]
mixed.full <- try(lmer(ADAS ~ AGE + EDUCATION + group + month + group:month
+ (month|UID), REML=FALSE, data=mixed.data))
mixed.reduced <- try(lmer(ADAS ~ AGE + EDUCATION + group + month + (month|
UID), REML=FALSE, data=mixed.data))

if ((class(mixed.full) == "try-error") | (class(mixed.reduced) == "try-error")) {
  result <- NA
} else {
  mixed.p.val <- anova(mixed.full, mixed.reduced)$"Pr(>Chisq)"[2]
  mixed.int <- fixef(mixed.full)["group1"]
  mixed.slope <- fixef(mixed.full)["group1:month"]

  writeLines("Full Mixed Effects Model")
  print(summary(mixed.full))
  writeLines("P Value for Full vs. Reduced Model")
  print(mixed.p.val)
  result <- summary(mixed.full)$coefficients["group1:month",1:2]
  sample.times <- c(0, 6, 12, 18, 24) /12
  med.values <- fixef(mixed.full)["(Intercept)"] + fixef(mixed.full)["group1"] + sample.t
imes * fixef(mixed.full)["month"] + sample.times * fixef(mixed.full)["group1:month"]
  nomed.values <- fixef(mixed.full)["(Intercept)"] + sample.times * fixef(mixed.full)["m
onth"]
  plot(sample.times, nomed.values, main=study.name, xlab="Time in Years", ylab="Fitt
ed ADAS-cog score", col="black", lty=1, type="l", xaxt="n", ylim=c(0,70))
  lines(sample.times, med.values, col="black", lty=2, type="l", xaxt="n")
  axis(1, at = sample.times)
}
results <- rbind(results, result)
}
rownames(results) <- unique(sample.mixed$STUDY)
N <- table(all.ad$STUDY, all.ad$group4)
idx <- N[,"ChEI"] != 0
N <- N[idx,]
results <- as.data.frame(results)
results$medN <- N[,"ChEI"]
results$nomedN <- N[,"Neither"]
results$author <- study.authors[rownames(results)]
results$year <- study.pubyears[rownames(results)]

```

```

idx <- order(results$year, results$author)
results <- results[idx,]
meta <- rma(yi=results[, "Estimate"], sei=results[, "Std. Error"])
print(meta)
results$severity <- "AD"
all.results <- results
rate.ad <- meta
#pdf("AAICRateForestChEI080818.pdf", width=11, height=8.5)
forest(meta, slab=paste(rownames(results), " (", results$author, ", ", results$year, ")", sep=""), ilab=cbind(results$medN, results$nomedN), ilab.xpos = c(-40, -25), digits=c(3,0), cex=1.0, xlab="Difference in ADAS-cog Slopes", cex.lab=1, at=c(-15, -10, -5, 0, 5, 10, 15), xlim=c(-70, 40), mlab="RE Model for AD") #, main="Comparison of ChEIs vs. Neither")
op <- par(cex = 1.0, font = 2)
text(-70, 11.5, "Abbreviation, Authors, Year", pos = 4, cex=1.0)
text(40.1, 11.5, "Slope Difference [95% CI]", pos = 2, cex=1.0)
text(c(-40, -25), 11.5, c("ChEIs", "No ChEIs"))
text(-33, 12, "Number of Subjects")
par(op, xpd=TRUE)
text(-21, -2.8, "Faster\ndecline\nwith\nneither")
text(22, -2.8, "Faster\ndecline\nwith\nChEIs")
#dev.off()
data.cols <- c("UID", "STUDY", "AGE", "EDUCATION", "ADAS_bl", "ADAS_m06", "ADAS_m12", "ADAS_m18", "ADAS_m24", "group", "group4")
idx <- all.data$SEVERITY=="AD"
all.ad <- all.data[idx,data.cols]
idx <- !duplicated(all.ad$UID)
all.ad <- all.ad[idx,]
idx <- !is.na(all.ad$STUDY)
all.ad <- all.ad[idx,]
idx <- !is.na(all.ad$ADAS_bl)
all.ad <- all.ad[idx,]
idx <- all.ad$STUDY %in% chei.studies
all.ad <- all.ad[idx,]
temp <- reshape(all.ad, idvar = "UID", varying = c("ADAS_bl", "ADAS_m06", "ADAS_m12", "ADAS_m18", "ADAS_m24"), direction = "long", sep = "_")
temp$month <- recode(temp$time, "'bl'=0;'m06'=6;'m12'=12;'m18'=18;'m24'=24")

temp$group <- ifelse(temp$group4=="ChEI", 1, ifelse(temp$group4=="Neither", 0, NA))
# ifelse($memantine==1, ifelse(medhist$chei==1, "Both", "Memantine"), ifelse(medhist$chei==1, "ChEI", "Neither"))

idx <- !is.na(temp$group)
temp <- temp[idx,]

```

```

idx <- order(temp$UID, temp$month)
temp <- temp[idx,]

idx <- !is.na(temp$ADAS)
temp <- temp[idx,]

sample.mixed <- temp
results <- NULL
for (i in unique(sample.mixed$STUDY)) {
  study.name <- i
  writeLines("Study Name")
  print(study.name)
  idx <- sample.mixed$STUDY==study.name
  mixed.data <- sample.mixed[idx,]

  mixed.data$month <- as.numeric(mixed.data$month)
  mixed.data$group <- as.factor(mixed.data$group)
  mixed.data$month <- mixed.data$month / 12
  idx <- order(mixed.data$UID, mixed.data$month)
  mixed.data <- mixed.data[idx,]
  mixed.full <- try(lmer(ADAS ~ AGE + EDUCATION + group + month + group:month
+ (month|UID), REML=FALSE, data=mixed.data))
  mixed.reduced <- try(lmer(ADAS ~ AGE + EDUCATION + group + month + (month|
UID), REML=FALSE, data=mixed.data))

  if ((class(mixed.full) == "try-error") | (class(mixed.reduced) == "try-error")) {
    result <- NA
  } else {
    mixed.p.val <- anova(mixed.full, mixed.reduced)$"Pr(>Chisq)"[2]
    mixed.int <- fixef(mixed.full)["group1"]
    mixed.slope <- fixef(mixed.full)["group1:month"]

    writeLines("Full Mixed Effects Model")
    print(summary(mixed.full))
    writeLines("P Value for Full vs. Reduced Model")
    print(mixed.p.val)
    result <- summary(mixed.full)$coefficients["group1:month",1:2]
    sample.times <- c(0, 6, 12, 18, 24) /12
    med.values <- fixef(mixed.full)[ "(Intercept)" ] + fixef(mixed.full)[ "group1" ] + sample.t
imes * fixef(mixed.full)[ "month" ] + sample.times * fixef(mixed.full)[ "group1:month" ]
    nomed.values <- fixef(mixed.full)[ "(Intercept)" ] + sample.times * fixef(mixed.full)[ "m
onth" ]
    plot(sample.times, nomed.values, main=study.name, xlab="Time in Years", ylab="Fitt
ed ADAS-cog score", col="black", lty=1, type="l", xaxt="n", ylim=c(0,70))
    lines(sample.times, med.values, col="black", lty=2, type="l", xaxt="n")
    axis(1, at = sample.times)

```

```

}
  results <- rbind(results, result)
}
rownames(results) <- unique(sample.mixed$STUDY)
N <- table(all.ad$STUDY, all.ad$group4)
idx <- N[,"ChEI"] != 0
N <- N[idx,]
results <- as.data.frame(results)
results$medN <- N[,"ChEI"]
results$nomedN <- N[,"Neither"]
results$author <- study.authors[rownames(results)]
results$year <- study.pubyears[rownames(results)]

idx <- order(results$year, results$author)
results <- results[idx,]
meta <- rma(yi=results[, "Estimate"], sei=results[, "Std. Error"], mods=study.relyears[rownames(results)])
print(meta)
results$severity <- "AD"
all.results <- results
rate.ad <- meta
#pdf("AAICRateForestChEIModerator080818.pdf", width=11, height=8.5)
forest(meta, slab=paste(rownames(results), " (", results$author, ", ", results$year, ")"), sep=""), ilab=cbind(results$medN, results$nomedN), ilab.xpos = c(-40, -25), digits=c(3,0), cex=1.0, xlab="Difference in ADAS-cog Slopes", cex.lab=1, at=c(-15, -10, -5, 0, 5, 10, 15), xlim=c(-70, 40), mlab="RE Model for AD") #, main="Comparison of ChEIs vs. Neither")
op <- par(cex = 1.0, font = 2)
text(-70, 11.5, "Abbreviation, Authors, Year", pos = 4, cex=1.0)
text(40.1, 11.5, "Slope Difference [95% CI]", pos = 2, cex=1.0)
text(c(-40, -25), 11.5, c("ChEIs", "No ChEIs"))
text(-33, 12, "Number of Subjects")
par(op, xpd=TRUE)
text(-21, -0.6, "Faster\ndecline\nwith\nneither")
text(22, -0.6, "Faster\ndecline\nwith\nChEIs")
#dev.off()
data.cols <- c("UID", "STUDY", "AGE", "EDUCATION", "ADAS_bl", "ADAS_m06", "ADAS_m12", "ADAS_m18", "ADAS_m24", "group", "group4")
idx <- all.data$SEVERITY=="AD"
all.ad <- all.data[idx,data.cols]
idx <- !duplicated(all.ad$UID)
all.ad <- all.ad[idx,]
idx <- !is.na(all.ad$STUDY)
all.ad <- all.ad[idx,]
idx <- !is.na(all.ad$ADAS_bl)
all.ad <- all.ad[idx,]

```

```

idx <- all.ad$STUDY %in% chei.studies
all.ad <- all.ad[idx,]
temp <- reshape(all.ad, idvar = "UID", varying = c("ADAS_bl", "ADAS_m06", "ADAS_m12", "ADAS_m18", "ADAS_m24"), direction = "long", sep = "_")
temp$month <- recode(temp$time, "'bl'=0;'m06'=6;'m12'=12;'m18'=18;'m24'=24")

temp$group <- ifelse(temp$group4=="ChEI", 1, ifelse(temp$group4=="Neither", 0, NA))
)
# ifelse($memantine==1, ifelse(medhist$chei==1,"Both", "Memantine"), ifelse(medhist$chei==1, "ChEI", "Neither"))

idx <- !is.na(temp$group)
temp <- temp[idx,]

idx <- order(temp$UID, temp$month)
temp <- temp[idx,]

idx <- !is.na(temp$ADAS)
temp <- temp[idx,]

sample.mixed <- temp
results <- NULL
for (i in unique(sample.mixed$STUDY)) {
  study.name <- i
  writeLines("Study Name")
  print(study.name)
  idx <- sample.mixed$STUDY==study.name
  mixed.data <- sample.mixed[idx,]

  mixed.data$month <- as.numeric(mixed.data$month)
  mixed.data$group <- as.factor(mixed.data$group)
  mixed.data$month <- mixed.data$month / 12
  idx <- order(mixed.data$UID, mixed.data$month)
  mixed.data <- mixed.data[idx,]
  mixed.full <- try(lmer(ADAS ~ AGE + EDUCATION + group + month + group:month + (month|UID), REML=FALSE, data=mixed.data))
  mixed.reduced <- try(lmer(ADAS ~ AGE + EDUCATION + group + month + (month|UID), REML=FALSE, data=mixed.data))

  if ((class(mixed.full) == "try-error") | (class(mixed.reduced) == "try-error")) {
    result <- NA
  } else {
    mixed.p.val <- anova(mixed.full, mixed.reduced)$"Pr(>Chisq)"[2]
    mixed.int <- fixef(mixed.full)["group1"]
    mixed.slope <- fixef(mixed.full)["group1:month"]
  }
}

```



```

writeLines("Full Mixed Effects Model")
print(summary(mixed.full))
writeLines("P Value for Full vs. Reduced Model")
print(mixed.p.val)
result <- summary(mixed.full)$coefficients["group1:month",1:2]
sample.times <- c(0, 6, 12, 18, 24) /12
med.values <- fixef(mixed.full)[ "(Intercept)" ] + fixef(mixed.full)[ "group1" ] + sample.t
imes * fixef(mixed.full)[ "month" ] + sample.times * fixef(mixed.full)[ "group1:month" ]
nomed.values <- fixef(mixed.full)[ "(Intercept)" ] + sample.times * fixef(mixed.full)[ "m
onth" ]
plot(sample.times, nomed.values, main=study.name, xlab="Time in Years", ylab="Fitt
ed ADAS-cog score", col="black", lty=1, type="l", xaxt="n", ylim=c(0,70))
lines(sample.times, med.values, col="black", lty=2, type="l", xaxt="n")
axis(1, at = sample.times)
}
results <- rbind(results, result)
}
rownames(results) <- unique(sample.mixed$STUDY)
N <- table(all.ad$STUDY, all.ad$group4)
idx <- N[,"ChEI" ] != 0
N <- N[idx,]
results <- as.data.frame(results)
results$medN <- N[,"ChEI" ]
results$nomedN <- N[,"Neither" ]
results$author <- study.authors[rownames(results)]
results$year <- study.pubyears[rownames(results)]

idx <- order(results$year, results$author)
results <- results[idx,]
meta <- rma(yi=results[, "Estimate" ], sei=results[, "Std. Error" ], mods=chei.pct[rownames
s(results)])
print(meta)
results$severity <- "AD"
all.results <- results
rate.ad <- meta
#pdf("AAICRateForestChEIPct080818.pdf", width=11, height=8.5)
forest(meta, slab=paste(rownames(results), " (", results$author, ", ", results$year, ")", se
p=""), ilab=cbind(results$medN, results$nomedN), ilab.xpos = c(-40, -25), digits=c(3,0),
cex=1.0, xlab="Difference in ADAS-cog Slopes", cex.lab=1, at=c(-15, -10, -5, 0, 5, 10, 1
5), xlim=c(-70, 40), mlab="RE Model for AD") #, main="Comparison of ChEIs vs. Neith
er")
op <- par(cex = 1.0, font = 2)
text(-70, 11.5, "Abbreviation, Authors, Year", pos = 4, cex=1.0)
text(40.1, 11.5, "Slope Difference [95% CI]", pos = 2, cex=1.0)
text(c(-40, -25), 11.5, c("ChEIs", "No ChEIs"))
text(-33, 12, "Number of Subjects")

```



```

par(op, xpd=TRUE)
text(-21, -0.6, "Faster\ndecline\nwith\nneither")
text(22, -0.6, "Faster\ndecline\nwith\nChEIs")
#dev.off()
data.cols <- c("UID", "STUDY", "AGE", "EDUCATION", "ADAS_bl", "ADAS_m06",
"ADAS_m12", "ADAS_m18", "ADAS_m24", "group", "group4")
idx <- all.data$SEVERITY=="AD"
all.ad <- all.data[idx,data.cols]
idx <- !duplicated(all.ad$UID)
all.ad <- all.ad[idx,]
idx <- !is.na(all.ad$STUDY)
all.ad <- all.ad[idx,]
idx <- !is.na(all.ad$ADAS_bl)
all.ad <- all.ad[idx,]
idx <- all.ad$STUDY %in% memantine.studies
all.ad <- all.ad[idx,]
temp <- reshape(all.ad, idvar = "UID", varying = c("ADAS_bl", "ADAS_m06", "ADAS
_m12", "ADAS_m18", "ADAS_m24"), direction = "long", sep = "_")
temp$month <- recode(temp$time, "'bl'=0;'m06'=6;'m12'=12;'m18'=18;'m24'=24")

temp$group <- ifelse(temp$group4=="Memantine" | temp$group4=="Both", 1, ifelse(te
mp$group4=="ChEI", 0, NA))

idx <- !is.na(temp$group)
temp <- temp[idx,]

idx <- order(temp$UID, temp$month)
temp <- temp[idx,]

idx <- !is.na(temp$ADAS)
temp <- temp[idx,]

sample.mixed <- temp
results <- NULL
for (i in unique(sample.mixed$STUDY)) {
  study.name <- i
  writeLines("Study Name")
  print(study.name)
  idx <- sample.mixed$STUDY==study.name
  mixed.data <- sample.mixed[idx,]

  mixed.data$month <- as.numeric(mixed.data$month)
  mixed.data$group <- as.factor(mixed.data$group)
  mixed.data$month <- mixed.data$month / 12
  idx <- order(mixed.data$UID, mixed.data$month)
  mixed.data <- mixed.data[idx,]
}

```

```

mixed.full <- try(lmer(ADAS ~ AGE + EDUCATION + group + month + group:month
+ (month|UID), REML=FALSE, data=mixed.data))
mixed.reduced <- try(lmer(ADAS ~ AGE + EDUCATION + group + month + (month|
UID), REML=FALSE, data=mixed.data))

if ((class(mixed.full) == "try-error") | (class(mixed.reduced) == "try-error")) {
  result <- NA
} else {
  mixed.p.val <- anova(mixed.full, mixed.reduced)$"Pr(>Chisq)"[2]
  mixed.int <- fixef(mixed.full)["group1"]
  mixed.slope <- fixef(mixed.full)["group1:month"]

  writeLines("Full Mixed Effects Model")
  print(summary(mixed.full))
  writeLines("P Value for Full vs. Reduced Model")
  print(mixed.p.val)
  result <- summary(mixed.full)$coefficients["group1:month",1:2]
  sample.times <- c(0, 6, 12, 18, 24) /12
  med.values <- fixef(mixed.full)["(Intercept)"] + fixef(mixed.full)["group1"] + sample.t
imes * fixef(mixed.full)["month"] + sample.times * fixef(mixed.full)["group1:month"]
  nomed.values <- fixef(mixed.full)["(Intercept)"] + sample.times * fixef(mixed.full)["m
onth"]
  plot(sample.times, nomed.values, main=study.name, xlab="Time in Years", ylab="Fitt
ed ADAS-cog score", col="black", lty=1, type="l", xaxt="n", ylim=c(0,70))
  lines(sample.times, med.values, col="black", lty=2, type="l", xaxt="n")
  axis(1, at = sample.times)
}
results <- rbind(results, result)
}
rownames(results) <- unique(sample.mixed$STUDY)
N <- table(all.ad$STUDY, all.ad$group4)
idx <- N[,1] != 0
N <- N[idx,]
results <- as.data.frame(results)
results$medN <- N[, "Memantine"] + N[, "Both"]
results$nomedN <- N[, "Neither"] + N[, "ChEI"]
results$author <- study.authors[rownames(results)]
results$year <- study.pubyears[rownames(results)]

idx <- order(results$year, results$author)
results <- results[idx,]
meta <- rma(yi=results[, "Estimate"], sei=results[, "Std. Error"])
print(meta)
results$severity <- "AD"
all.results <- results
rate.ad <- meta

```

```

#pdf("AAICRateForestMemantine080818.pdf", width=11, height=8.5)
forest(meta, slab=paste(rownames(results), " (", results$author, ", ", results$year, ")"), se
p=""), ilab=cbind(results$medN, results$nomedN), ilab.xpos = c(-40, -25), digits=c(3,0),
cex=1.0, xlab="Difference in ADAS-cog Slopes", cex.lab=1, at=c(-15, -10,-5, 0, 5, 10, 1
5), xlim=c(-70, 40), mlab="RE Model for AD") #, main="Comparison of Memantine + B
oth vs. ChEIs + Neither")
op <- par(cex = 1.0, font = 2)
text(-70, 7.5, "Abbreviation, Authors, Year", pos = 4, cex=1.0)
text(40.1, 7.5, "Slope Difference [95% CI]", pos = 2, cex=1.0)
text(c(-40, -25), 7.5, c("Memantine", "No Memantine"))
text(-33, 8, "Number of Subjects")
par(op, xpd=TRUE)
text(-21, -2.4, "Faster\ndecline\nwith ChEIs\n/neither")
text(22, -2.4, "Faster\ndecline\nwith both\n/memantine")
#dev.off()
# Rates for memantine vs. ChEIs, with moderator of study year
data.cols <- c("UID", "STUDY", "AGE", "EDUCATION", "ADAS_bl", "ADAS_m06",
"ADAS_m12", "ADAS_m18", "ADAS_m24", "group", "group4")
idx <- all.data$SEVERITY=="AD"
all.ad <- all.data[idx,data.cols]
idx <- !duplicated(all.ad$UID)
all.ad <- all.ad[idx,]
idx <- !is.na(all.ad$STUDY)
all.ad <- all.ad[idx,]
idx <- !is.na(all.ad$ADAS_bl)
all.ad <- all.ad[idx,]
idx <- all.ad$STUDY %in% memantine.studies
all.ad <- all.ad[idx,]
temp <- reshape(all.ad, idvar = "UID", varying = c("ADAS_bl", "ADAS_m06", "ADAS
_m12", "ADAS_m18", "ADAS_m24"), direction = "long", sep="_")
temp$month <- recode(temp$time, "'bl'=0;'m06'=6;'m12'=12;'m18'=18;'m24'=24")

temp$group <- ifelse(temp$group4=="Memantine" | temp$group4=="Both", 1, ifelse(te
mp$group4=="ChEI", 0, NA))

idx <- !is.na(temp$group)
temp <- temp[idx,]

idx <- order(temp$UID, temp$month)
temp <- temp[idx,]

idx <- !is.na(temp$ADAS)
temp <- temp[idx,]

sample.mixed <- temp
results <- NULL

```

```

for (i in unique(sample.mixed$STUDY)) {
  study.name <- i
  writeLines("Study Name")
  print(study.name)
  idx <- sample.mixed$STUDY==study.name
  mixed.data <- sample.mixed[idx,]

  mixed.data$month <- as.numeric(mixed.data$month)
  mixed.data$group <- as.factor(mixed.data$group)
  mixed.data$month <- mixed.data$month / 12
  idx <- order(mixed.data$UID, mixed.data$month)
  mixed.data <- mixed.data[idx,]
  mixed.full <- try(lmer(ADAS ~ AGE + EDUCATION + group + month + group:month
+ (month|UID), REML=FALSE, data=mixed.data))
  mixed.reduced <- try(lmer(ADAS ~ AGE + EDUCATION + group + month + (month|
UID), REML=FALSE, data=mixed.data))

  if ((class(mixed.full) == "try-error") | (class(mixed.reduced) == "try-error")) {
    result <- NA
  } else {
    mixed.p.val <- anova(mixed.full, mixed.reduced)$"Pr(>Chisq)"[2]
    mixed.int <- fixef(mixed.full)["group1"]
    mixed.slope <- fixef(mixed.full)["group1:month"]

    writeLines("Full Mixed Effects Model")
    print(summary(mixed.full))
    writeLines("P Value for Full vs. Reduced Model")
    print(mixed.p.val)
    result <- summary(mixed.full)$coefficients["group1:month",1:2]
    sample.times <- c(0, 6, 12, 18, 24) /12
    med.values <- fixef(mixed.full)[ "(Intercept)" ] + fixef(mixed.full)[ "group1" ] + sample.t
imes * fixef(mixed.full)[ "month" ] + sample.times * fixef(mixed.full)[ "group1:month" ]
    nomed.values <- fixef(mixed.full)[ "(Intercept)" ] + sample.times * fixef(mixed.full)[ "m
onth" ]
    plot(sample.times, nomed.values, main=study.name, xlab="Time in Years", ylab="Fitt
ed ADAS-cog score", col="black", lty=1, type="l", xaxt="n", ylim=c(0,70))
    lines(sample.times, med.values, col="black", lty=2, type="l", xaxt="n")
    axis(1, at = sample.times)
  }
  results <- rbind(results, result)
}
rownames(results) <- unique(sample.mixed$STUDY)
N <- table(all.ad$STUDY, all.ad$group4)
idx <- N[,1] != 0
N <- N[idx,]
results <- as.data.frame(results)

```

```

results$medN <- N[, "Memantine"] + N[, "Both"]
results$nomedN <- N[, "Neither"] + N[, "ChEI"]
results$author <- study.authors[rownames(results)]
results$year <- study.pubyears[rownames(results)]

idx <- order(results$year, results$author)
results <- results[idx,]
meta <- rma(yi=results[, "Estimate"], sei=results[, "Std. Error"], mods=study.relyears[rownames(results)])
print(meta)
results$severity <- "AD"
all.results <- results
rate.ad <- meta
#pdf("AAICRateForestMemantineModerator080818.pdf", width=11, height=8.5)
forest(meta, slab=paste(rownames(results), " (", results$author, ", ", results$year, ")"), sep="", ilab=cbind(results$medN, results$nomedN), ilab.xpos = c(-40, -25), digits=c(3,0), cex=1.0, xlab="Difference in ADAS-cog Slopes", cex.lab=1, at=c(-15, -10, -5, 0, 5, 10, 15), xlim=c(-70, 40), mlab="RE Model for AD") #, main="Comparison of Memantine + Both vs. ChEIs + Neither")
op <- par(cex = 1.0, font = 2)
text(-70, 7.5, "Abbreviation, Authors, Year", pos = 4, cex=1.0)
text(40.1, 7.5, "Slope Difference [95% CI]", pos = 2, cex=1.0)
text(c(-40, -25), 7.5, c("Memantine", "No Memantine"))
text(-33, 8, "Number of Subjects")
par(op, xpd=TRUE)
text(-21, -0.3, "Faster\ndecline\nwith ChEIs\n/neither")
text(22, -0.3, "Faster\ndecline\nwith both\n/memantine")
#dev.off()
data.cols <- c("UID", "STUDY", "AGE", "EDUCATION", "ADAS_bl", "ADAS_m06", "ADAS_m12", "ADAS_m18", "ADAS_m24", "group", "group4")
idx <- all.data$SEVERITY=="AD"
all.ad <- all.data[idx,data.cols]
idx <- !duplicated(all.ad$UID)
all.ad <- all.ad[idx,]
idx <- !is.na(all.ad$STUDY)
all.ad <- all.ad[idx,]
idx <- !is.na(all.ad$ADAS_bl)
all.ad <- all.ad[idx,]
idx <- all.ad$STUDY %in% memantine.studies
all.ad <- all.ad[idx,]
temp <- reshape(all.ad, idvar = "UID", varying = c("ADAS_bl", "ADAS_m06", "ADAS_m12", "ADAS_m18", "ADAS_m24"), direction = "long", sep = "_")
temp$month <- recode(temp$time, "'bl'=0;'m06'=6;'m12'=12;'m18'=18;'m24'=24")

temp$group <- ifelse(temp$group4=="Memantine" | temp$group4=="Both", 1, ifelse(temp$group4=="ChEI", 0, NA))

```

```

idx <- !is.na(temp$group)
temp <- temp[idx,]

idx <- order(temp$UID, temp$month)
temp <- temp[idx,]

idx <- !is.na(temp$ADAS)
temp <- temp[idx,]

sample.mixed <- temp
results <- NULL
for (i in unique(sample.mixed$STUDY)) {
  study.name <- i
  writeLines("Study Name")
  print(study.name)
  idx <- sample.mixed$STUDY==study.name
  mixed.data <- sample.mixed[idx,]

  mixed.data$month <- as.numeric(mixed.data$month)
  mixed.data$group <- as.factor(mixed.data$group)
  mixed.data$month <- mixed.data$month / 12
  idx <- order(mixed.data$UID, mixed.data$month)
  mixed.data <- mixed.data[idx,]
  mixed.full <- try(lmer(ADAS ~ AGE + EDUCATION + group + month + group:month
+ (month|UID), REML=FALSE, data=mixed.data))
  mixed.reduced <- try(lmer(ADAS ~ AGE + EDUCATION + group + month + (month|
UID), REML=FALSE, data=mixed.data))

  if ((class(mixed.full) == "try-error") | (class(mixed.reduced) == "try-error")) {
    result <- NA
  } else {
    mixed.p.val <- anova(mixed.full, mixed.reduced)$"Pr(>Chisq)"[2]
    mixed.int <- fixef(mixed.full)["group1"]
    mixed.slope <- fixef(mixed.full)["group1:month"]

    writeLines("Full Mixed Effects Model")
    print(summary(mixed.full))
    writeLines("P Value for Full vs. Reduced Model")
    print(mixed.p.val)
    result <- summary(mixed.full)$coefficients["group1:month",1:2]
    sample.times <- c(0, 6, 12, 18, 24) /12
    med.values <- fixef(mixed.full)[ "(Intercept)" ] + fixef(mixed.full)[ "group1" ] + sample.t
imes * fixef(mixed.full)[ "month" ] + sample.times * fixef(mixed.full)[ "group1:month" ]
    nomed.values <- fixef(mixed.full)[ "(Intercept)" ] + sample.times * fixef(mixed.full)[ "m
onth" ]

```

```

    plot(sample.times, nomed.values, main=study.name, xlab="Time in Years", ylab="Fitted ADAS-cog score", col="black", lty=1, type="l", xaxt="n", ylim=c(0,70))
    lines(sample.times, med.values, col="black", lty=2, type="l", xaxt="n")
    axis(1, at = sample.times)
  }
  results <- rbind(results, result)
}
rownames(results) <- unique(sample.mixed$STUDY)
N <- table(all.ad$STUDY, all.ad$group4)
idx <- N[,1] != 0
N <- N[idx,]
results <- as.data.frame(results)
results$medN <- N[, "Memantine"] + N[, "Both"]
results$nomedN <- N[, "Neither"] + N[, "ChEI"]
results$author <- study.authors[rownames(results)]
results$year <- study.pubyears[rownames(results)]

idx <- order(results$year, results$author)
results <- results[idx,]
meta <- rma(yi=results[, "Estimate"], sei=results[, "Std. Error"], mods=memantine.pct[rownames(results)])
print(meta)
results$severity <- "AD"
all.results <- results
rate.ad <- meta
#pdf("AAICRateForestMemantineModerator080818.pdf", width=11, height=8.5)
forest(meta, slab=paste(rownames(results), " (", results$author, ", ", results$year, ")", sep=""), ilab=cbind(results$medN, results$nomedN), ilab.xpos = c(-40, -25), digits=c(3,0), cex=1.0, xlab="Difference in ADAS-cog Slopes", cex.lab=1, at=c(-15, -10, -5, 0, 5, 10, 15), xlim=c(-70, 40), mlab="RE Model for AD") #, main="Comparison of Memantine + Both vs. ChEIs + Neither")
op <- par(cex = 1.0, font = 2)
text(-70, 7.5, "Abbreviation, Authors, Year", pos = 4, cex=1.0)
text(40.1, 7.5, "Slope Difference [95% CI]", pos = 2, cex=1.0)
text(c(-40, -25), 7.5, c("Memantine", "No Memantine"))
text(-33, 8, "Number of Subjects")
par(op, xpd=TRUE)
text(-21, -0.3, "Faster decline\nwith ChEIs\n/neither")
text(22, -0.3, "Faster decline\nwith both\n/memantine")
#dev.off()
render_markdown()
sessionInfo()

```

## Computing Environment

```
## R version 3.5.0 (2018-04-23)
## Platform: x86_64-apple-darwin15.6.0 (64-bit)
## Running under: macOS High Sierra 10.13.6
##
## Matrix products: default
## BLAS: /Library/Frameworks/R.framework/Versions/3.5/Resources/lib/libRblas.0.dylib
## LAPACK: /Library/Frameworks/R.framework/Versions/3.5/Resources/lib/libRlapack.dylib
##
## locale:
## [1] en_US.UTF-8/en_US.UTF-8/en_US.UTF-8/C/en_US.UTF-8/en_US.UTF-8
##
## attached base packages:
## [1] parallel stats graphics grDevices utils datasets methods
## [8] base
##
## other attached packages:
## [1] compute.es_0.2-4 calibrate_1.7.2 MASS_7.3-50
## [4] EMAtools_0.1.3 lme4_1.1-17 metafor_2.0-0
## [7] Matrix_1.2-14 car_3.0-0 carData_3.0-1
## [10] compareGroups_3.4.0 SNPassoc_1.9-2 mvtnorm_1.0-7
## [13] haplo.stats_1.7.9 xtable_1.8-2 gdata_2.18.0
## [16] Hmisc_4.1-1 ggplot2_2.2.1 Formula_1.2-3
## [19] survival_2.42-3 lattice_0.20-35 bibtex_0.4.2
## [22] knitr_1.0.8 knitr_1.20
##
## loaded via a namespace (and not attached):
## [1] TH.data_1.0-8 minqa_1.2.4 colorspace_1.3-2
## [4] modeltools_0.2-22 rio_0.5.10 ggridges_0.5.0
## [7] sjlabelled_1.0.12 rprojroot_1.3-2 snakecase_0.9.1
## [10] estimability_1.3 htmlTable_1.12 base64enc_0.1-3
## [13] rstudioapi_0.7 mice_3.0.0 glmmTMB_0.2.2.0
## [16] MatrixModels_0.4-1 lubridate_1.7.4 coin_1.2-2
## [19] RefManageR_1.2.0 xml2_1.2.0 codetools_0.2-15
## [22] splines_3.5.0 sjmisc_2.7.4 bayesplot_1.6.0
## [25] jsonlite_1.5 nloptr_1.0.4 broom_0.5.0
## [28] cluster_2.0.7-1 compiler_3.5.0 httr_1.3.1
## [31] emmeans_1.2.3 sjstats_0.16.0 backports_1.1.2
## [34] assertthat_0.2.0 lazyeval_0.2.1 acepack_1.4.1
## [37] htmltools_0.3.6 quantreg_5.36 tools_3.5.0
## [40] lmerTest_3.0-1 bindrcpp_0.2.2 coda_0.19-1
## [43] gtable_0.2.0 glue_1.2.0 dplyr_0.7.5
## [46] Rcpp_0.12.17 cellranger_1.1.0 nlme_3.1-137
## [49] lmtest_0.9-36 stringr_1.3.1 openxlsx_4.1.0
```



```
## [52] gtools_3.5.0      stringdist_0.9.5.1 polspline_1.1.12
## [55] pan_1.4           zoo_1.8-1         scales_0.5.0
## [58] hms_0.4.2        sandwich_2.4-0    SparseM_1.77
## [61] pwr_1.2-2         TMB_1.7.14        RColorBrewer_1.1-2
## [64] HardyWeinberg_1.5.9 yaml_2.1.19      curl_3.2
## [67] gridExtra_2.3     epitools_0.5-10   rms_5.1-2
## [70] rpart_4.1-13      latticeExtra_0.6-28 stringi_1.2.2
## [73] highr_0.6         checkmate_1.8.5   zip_1.0.0
## [76] truncnorm_1.0-8    rlang_0.2.0       pkgconfig_2.0.1
## [79] Rsolnp_1.16       DataCombine_0.2.21 evaluate_0.10.1
## [82] prediction_0.3.6   purrr_0.2.5       bindr_0.1.1
## [85] htmlwidgets_1.2   tidycselect_0.2.4 plyr_1.8.4
## [88] magrittr_1.5      R6_2.2.2          mitml_0.3-5
## [91] multcomp_1.4-8    pillar_1.2.3      haven_1.1.2
## [94] foreign_0.8-70    abind_1.4-5       nnet_7.3-12
## [97] tibble_1.4.2      modelr_0.1.2      crayon_1.3.4
## [100] jomo_2.6-2        rmarkdown_1.9     grid_3.5.0
## [103] readxl_1.1.0      data.table_1.11.4 forcats_0.3.0
## [106] digest_0.6.15     numDeriv_2016.8-1 tidyr_0.8.1
## [109] stats4_3.5.0      munsell_0.4.3
```
